# Supplementary material for: Hacia un Estado social mínimo
Source: Royal Society of Chemistry journal article supplement (doi:10.1039/c8ob01795f), 2012-01-01
Supplement: c8ob01795f1.pdf [file c8ob01795f1.pdf]

**A Combined Synthetic and Computational Study of Novel Binaphthyl and Biphenyl  $\alpha$ - and  $\beta$ -Amino Acids and Esters: Organocatalysis of Asymmetric Diels Alder Reactions**

Philip C. Bulman Page,<sup>a\*</sup> Francesca Kinsey,<sup>a</sup> Yohan Chan,<sup>a</sup> Ian Strutt,<sup>a</sup> Alexandra M. Z. Slawin,<sup>b</sup> Garth Jones<sup>a\*</sup>

*a School of Chemistry, University of East Anglia, Norwich Research Park, Norwich, NR4 7TJ, UK.*

*b School of Chemistry, University of St Andrews, Purdie Building, North Haugh, St Andrews, Scotland KY16 9AJ, UK.*

**Supporting information**

|         |                                         |
|---------|-----------------------------------------|
| S2      | General Experimental Detail             |
| S3-60   | NMR Spectra                             |
| S61-97  | HPLC Traces                             |
| S98-122 | Computational Supplementary Information |

## General Experimental Detail

Melting points were recorded using a Büchi B-545 Melting Point apparatus. Optical rotations were obtained using a Bellingham and Stanley Ltd ADP440 polarimeter and the solvents used for these measurements were of HPLC-grade quality. IR spectra were recorded on a Perkin-Elmer 100 FT-IR spectrophotometer and samples were used as thin film DCM solutions on KBr plates. NMR spectra were recorded on a Bruker 500 MHz Spectrometer. Chemical shifts were recorded in parts per million (ppm), *J* values are given in Hertz (Hz) and are referenced against tetramethylsilane or the residual deuterated solvents peak. High-resolution mass spectra were obtained from the EPSRC Mass Spectrometry Unit at the University of Swansea. Enantiomeric excesses were determined by chiral high performance liquid chromatography using a Hitachi Elite LaChrom HPLC system using an L-2200 autosampler, L-2130 pump and L-2400 UV detector. All HPLC samples were run against racemate as a standard and using a hexane-isopropanol mixture. Conditions varied and are provided in detail below. Unless otherwise stated, all starting materials were sourced from commercial suppliers and were used without any purification. Reactions which required the use of anhydrous solvents were, in the case of THF and Et<sub>2</sub>O, dried and distilled over sodium and benzophenone. Toluene, DCM and CH<sub>3</sub>CN were distilled over CaH<sub>2</sub> and DMF was distilled over MgSO<sub>4</sub>. Needles and glassware were oven-dried and allowed to cool under a positive pressure of nitrogen gas prior to use. Light petroleum ether was distilled at 40-60 °C to remove impurities. Dicyclopentadiene was cracked on the day of use to distil cyclopentadiene.

**(S)-(+)-[1,1']-Binaphthalene-2,2'-diol bis-trifluoromethanesulfonate**

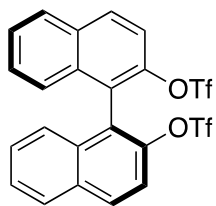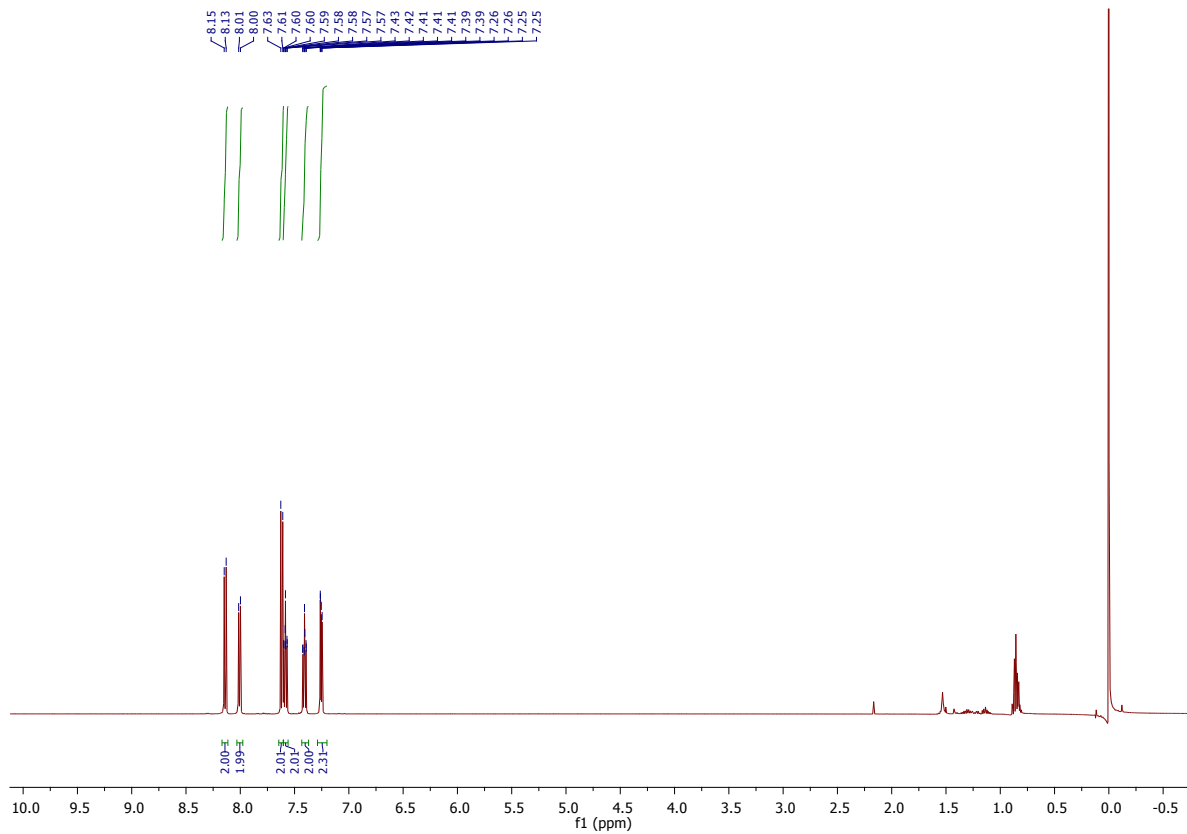

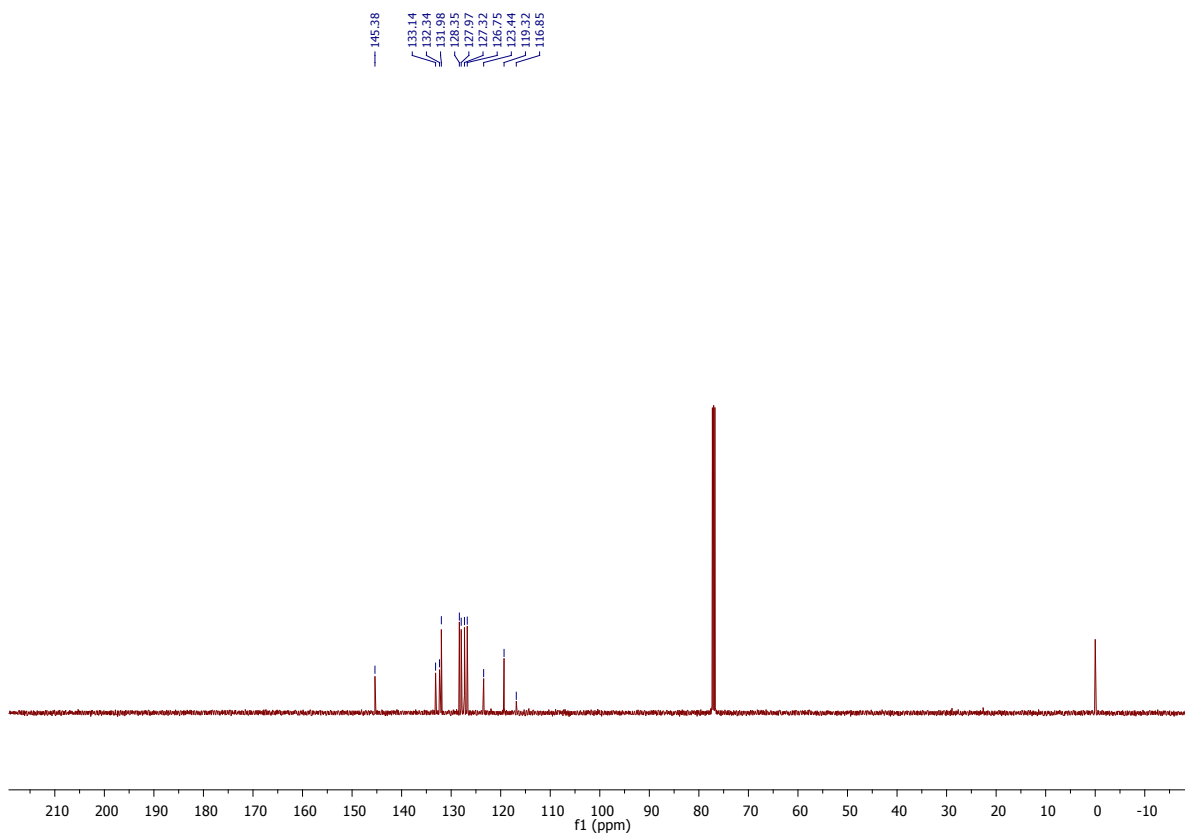

**(S)-(+)-2,2'-Dimethyl-[1,1']binaphthalene**

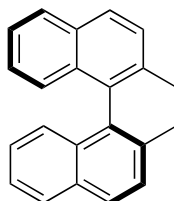

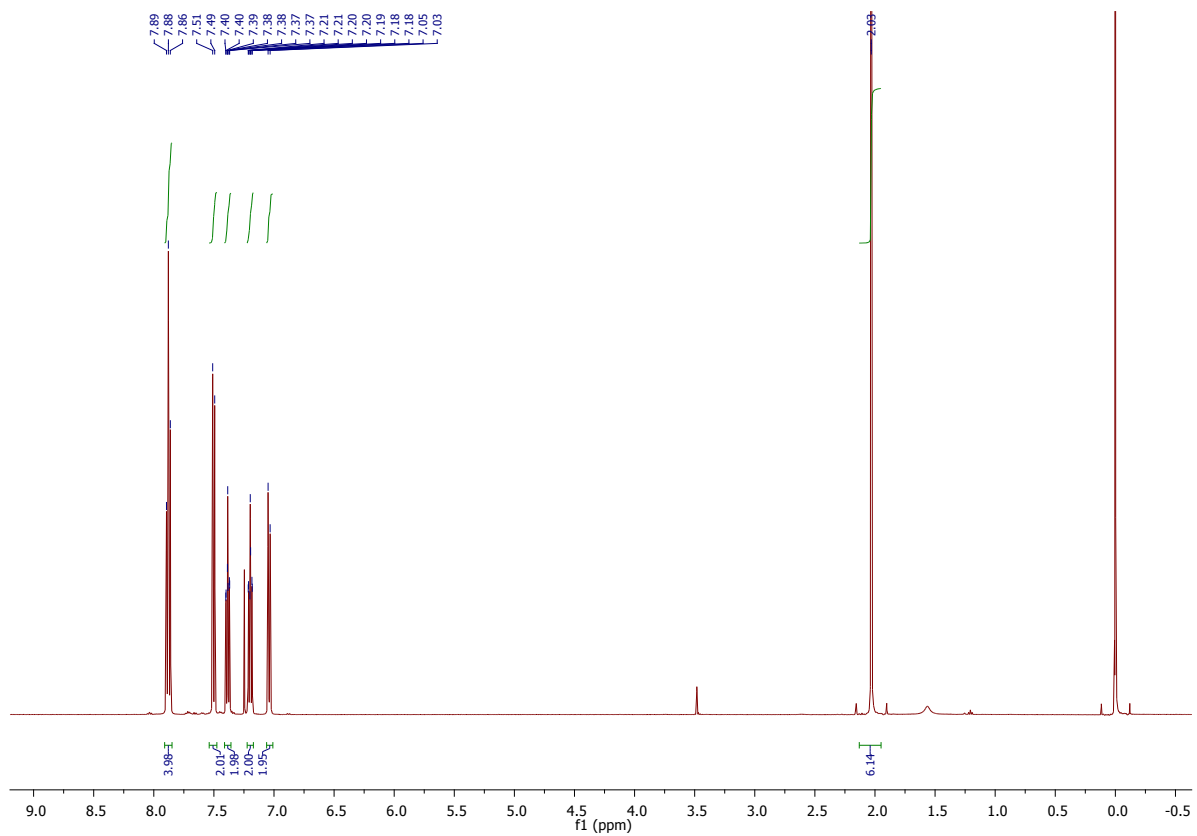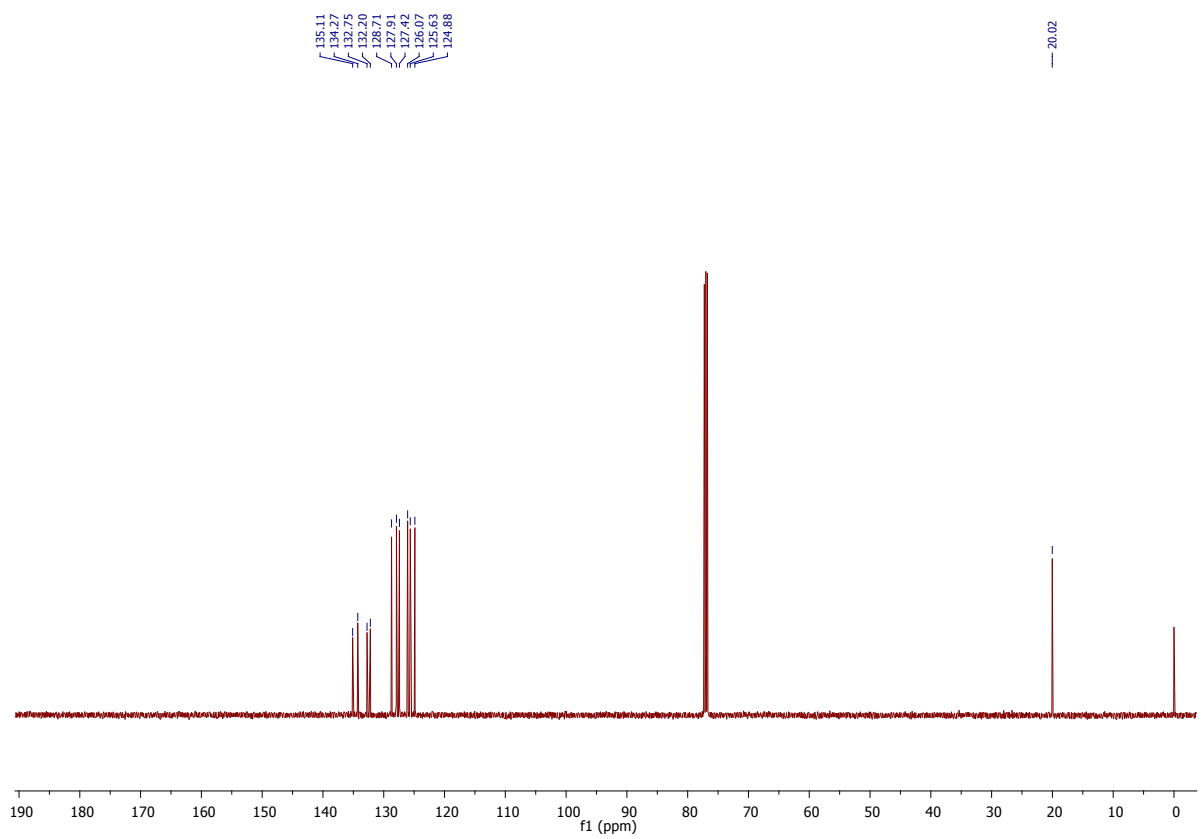

**(S)-2,2'-Bis-bromomethyl-[1,1']binaphthalene (-)-7**

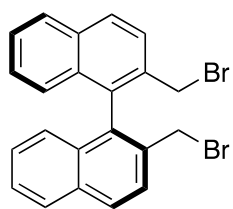

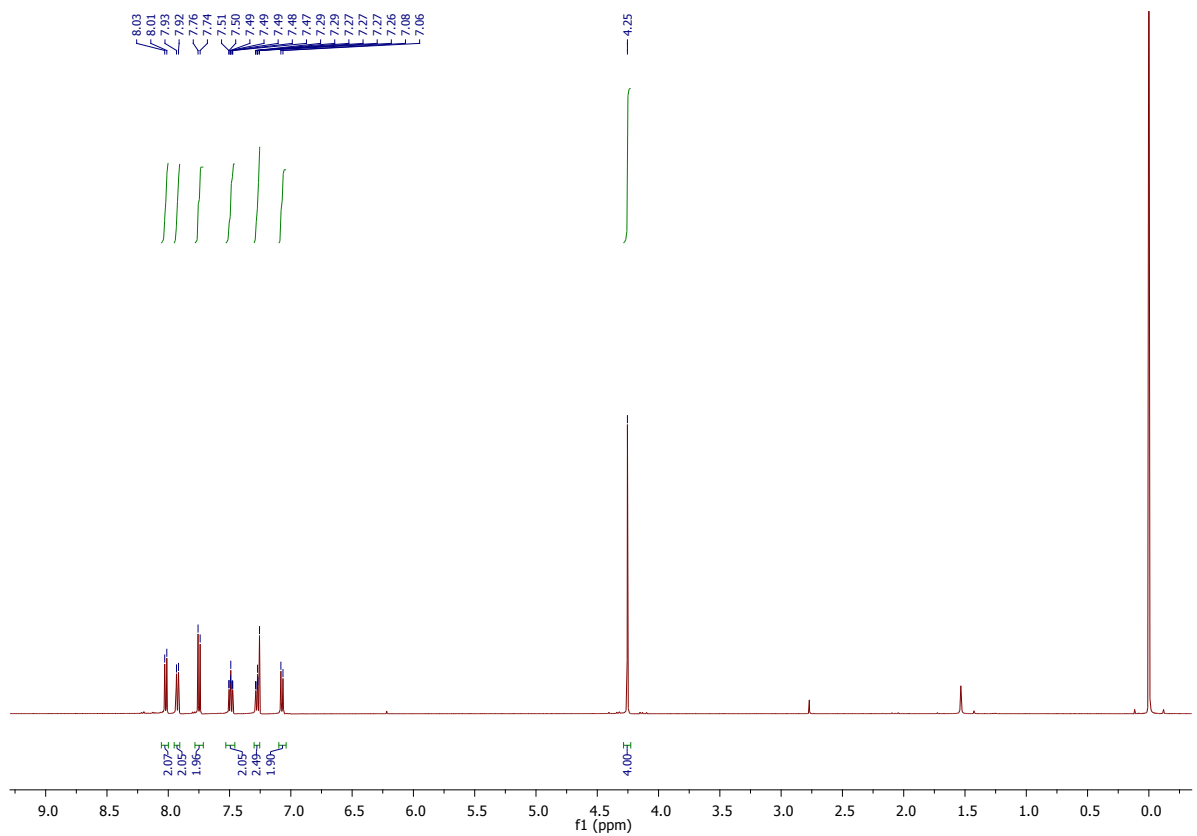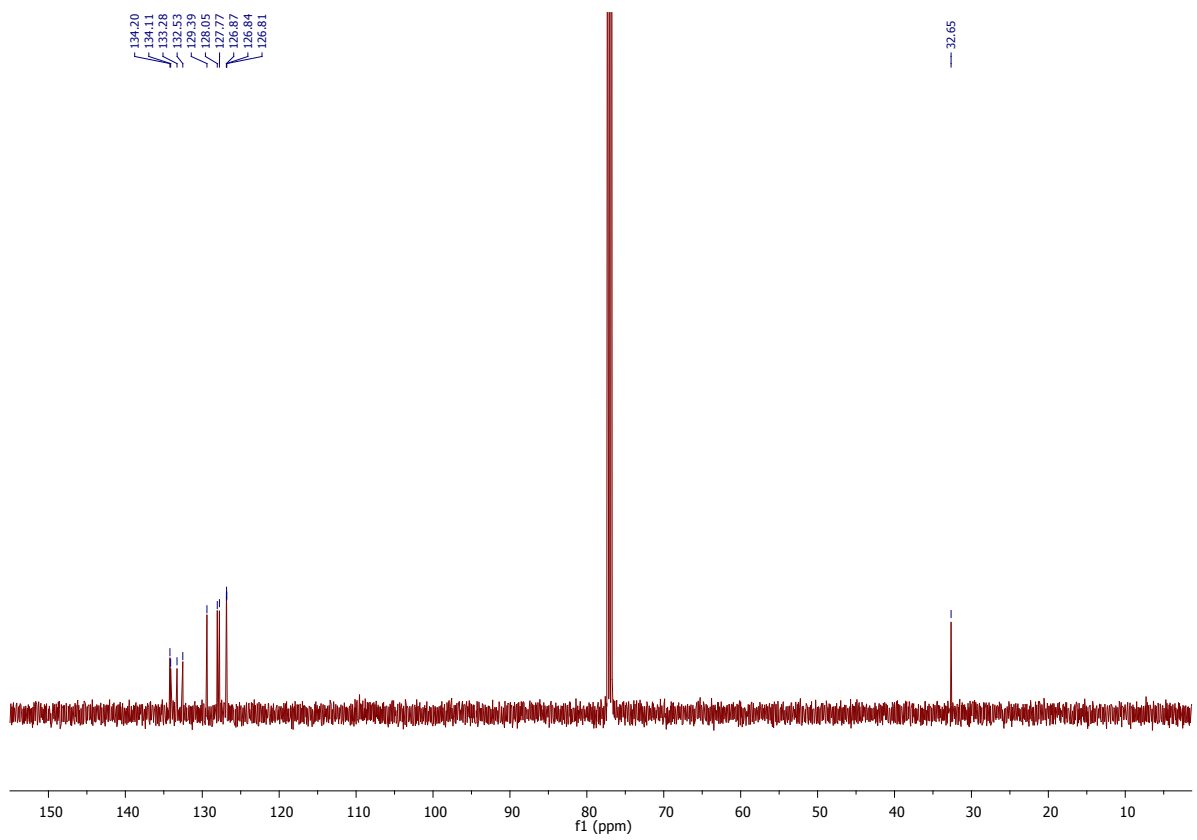

**(S)-3,5-Dihydrodinaphtho[2,1-c:1',2'-e]oxepine (+)-9**

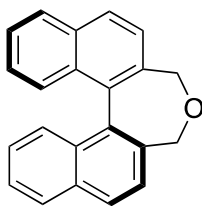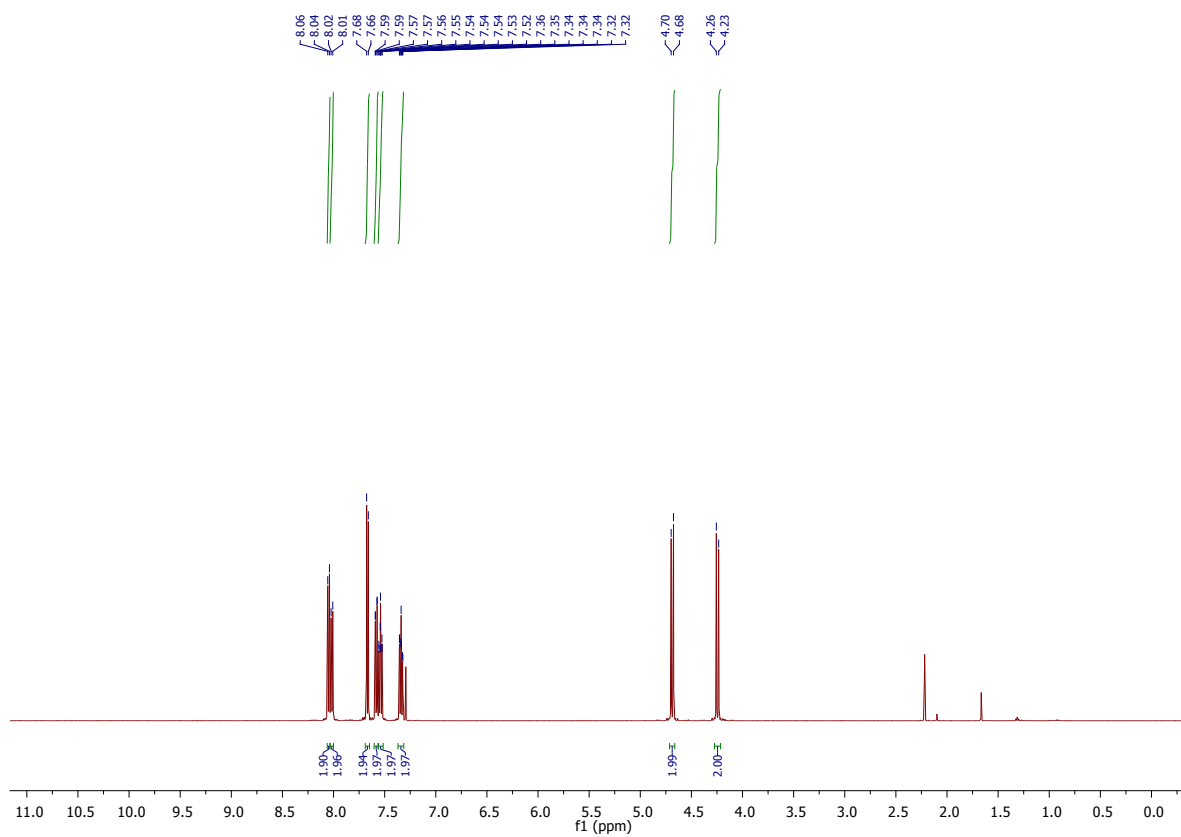



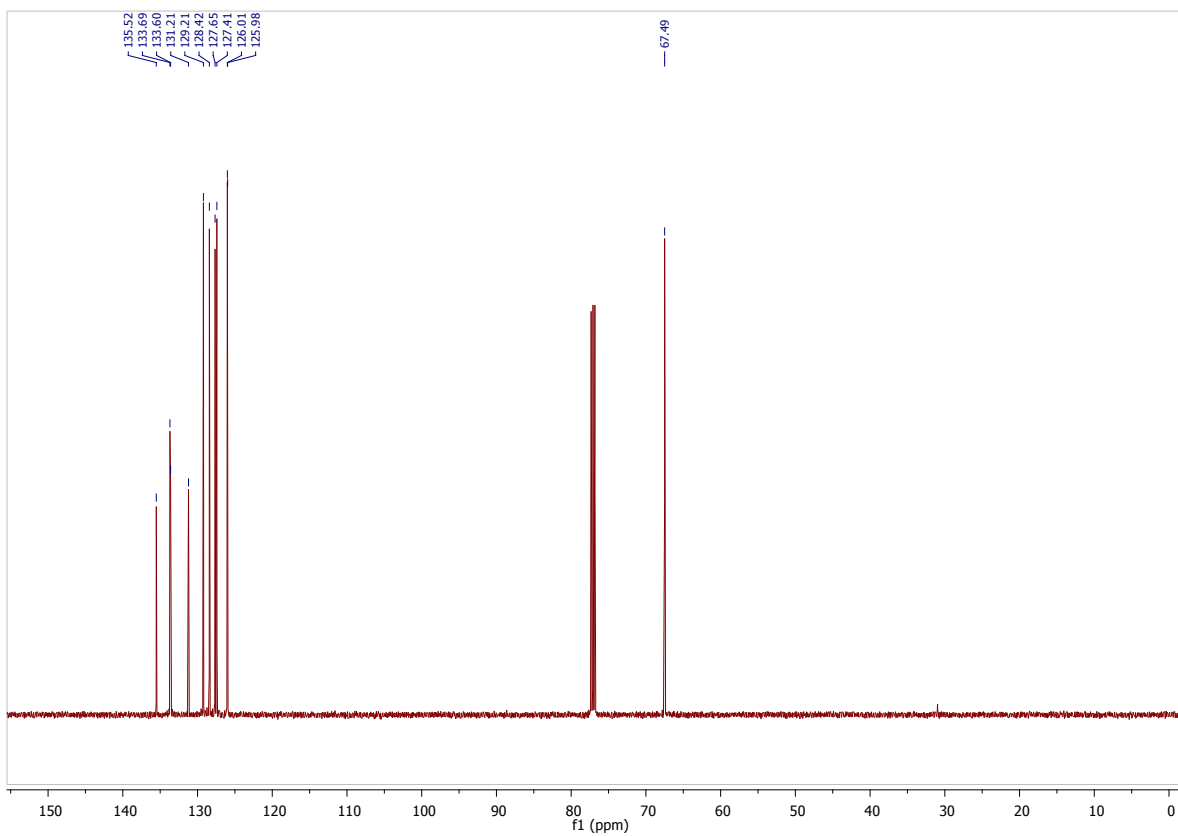

**(S)-2'-Bromomethyl-[1,1']binaphthalene-2-carboxaldehyde (-)-10**

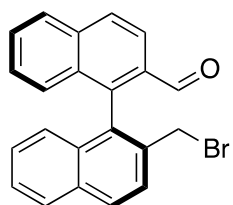

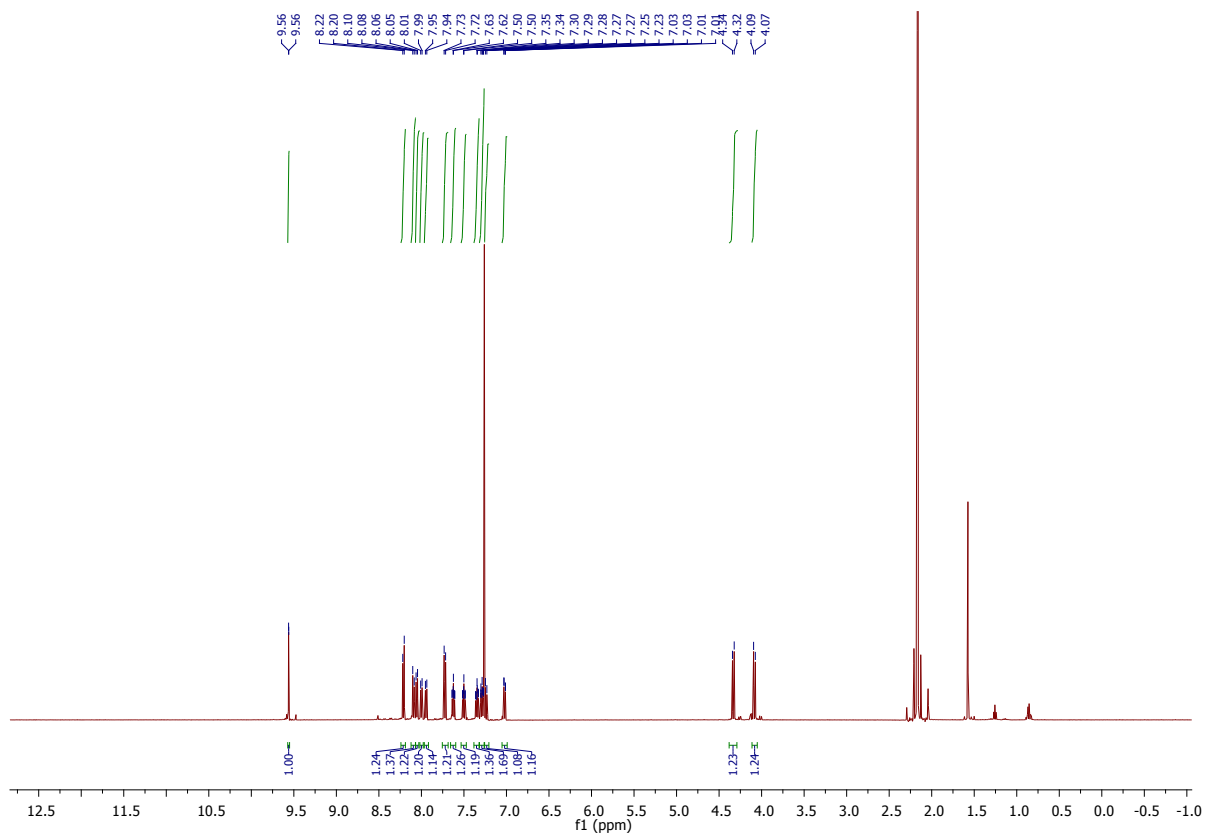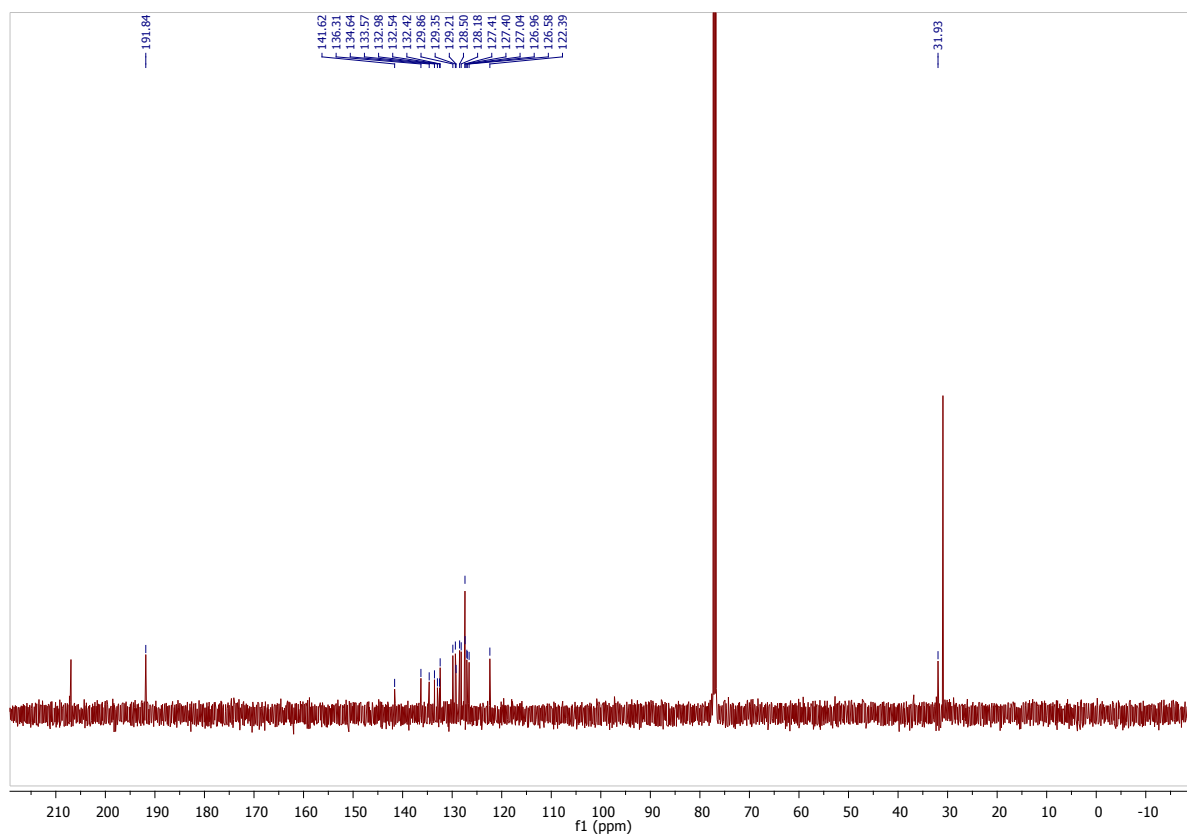

**(S)-Allyl-4,5-dihydro-3H-4-aza-cyclohepta[2,1-a;3,4-a']dinaphthalene (+)-6**

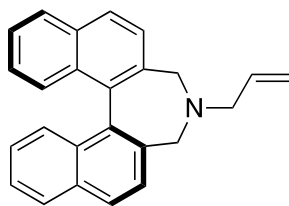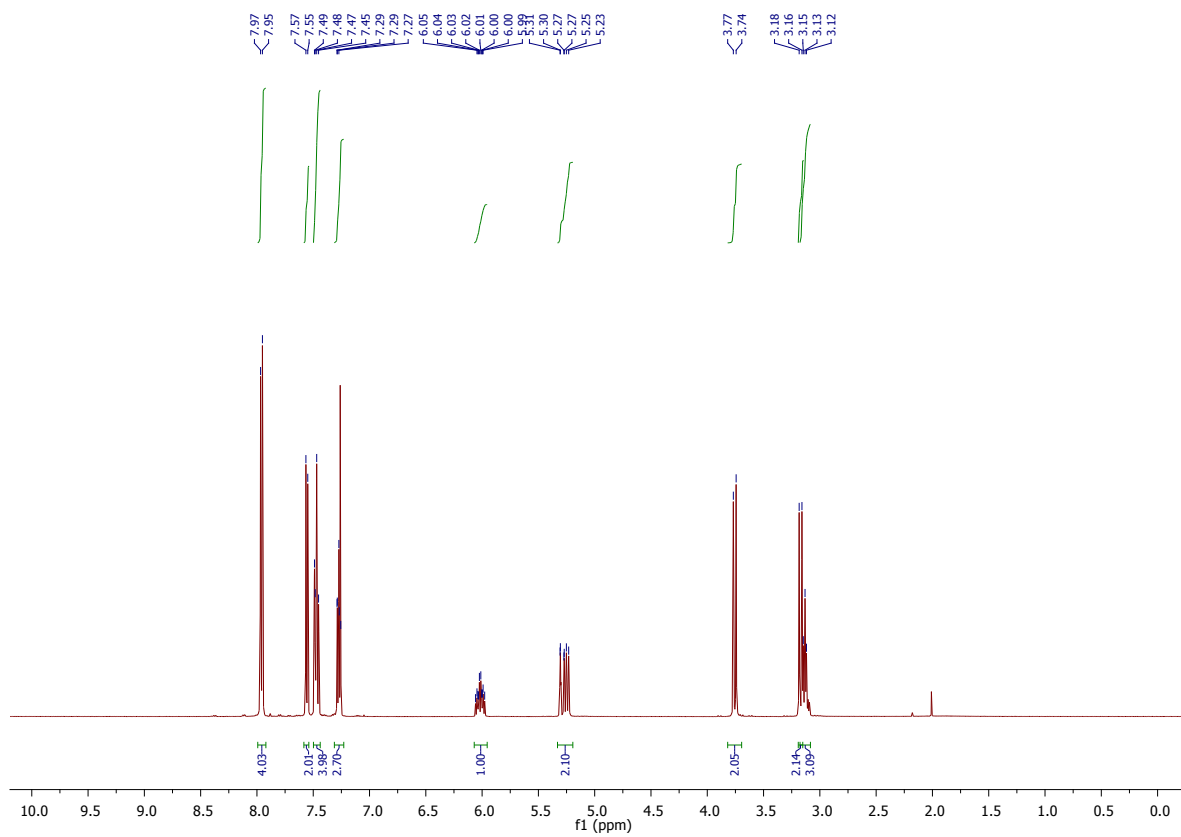

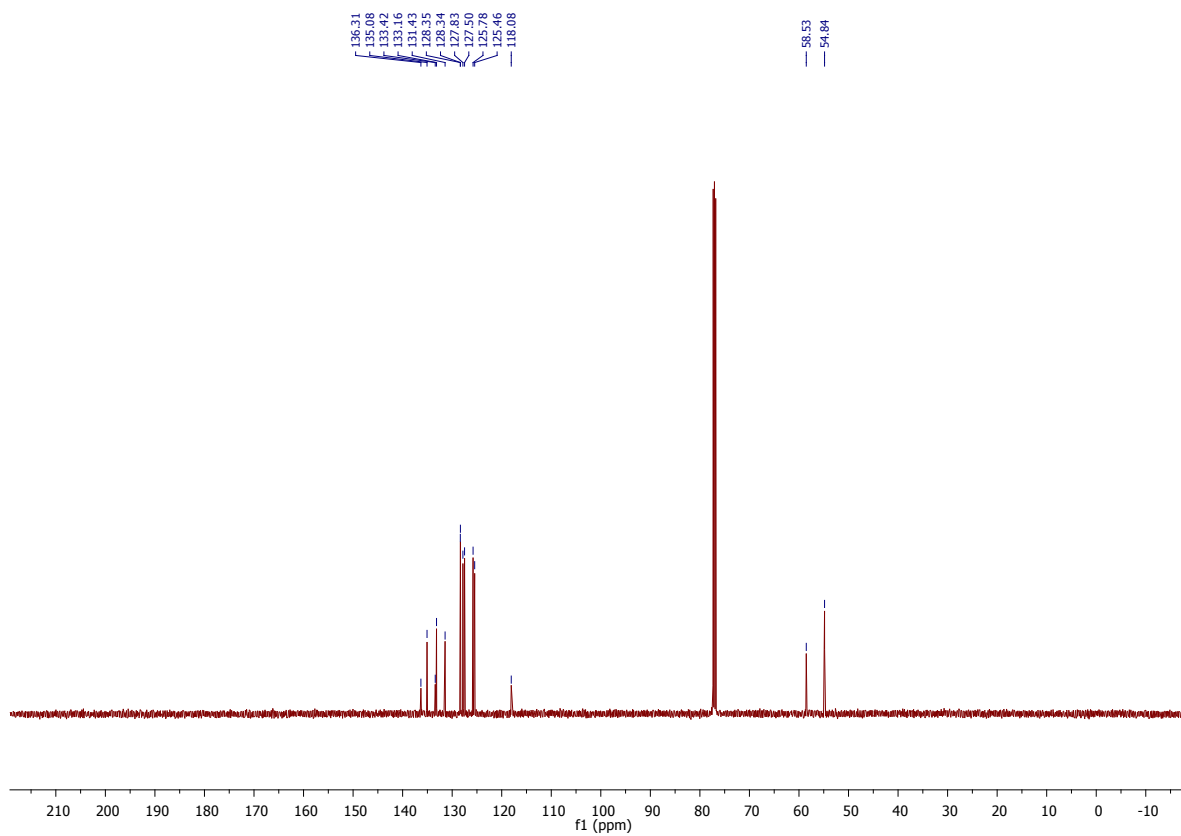

**(S)-4-Allyl-3H-dinaphtho[2,1-c:1',2'-e]azepin-4-ium tetraphenylborate (+)-8**

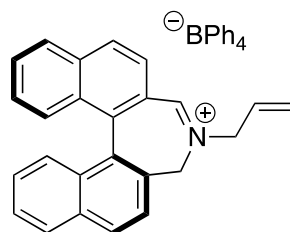

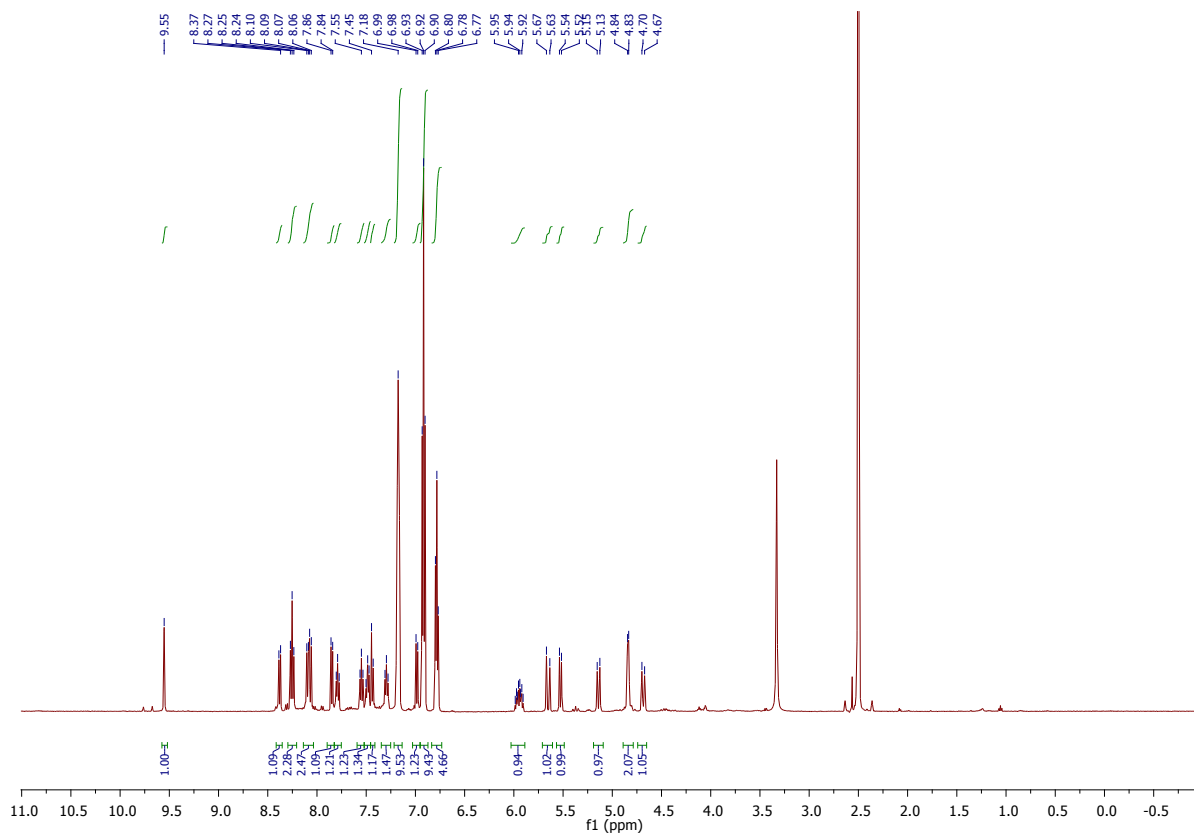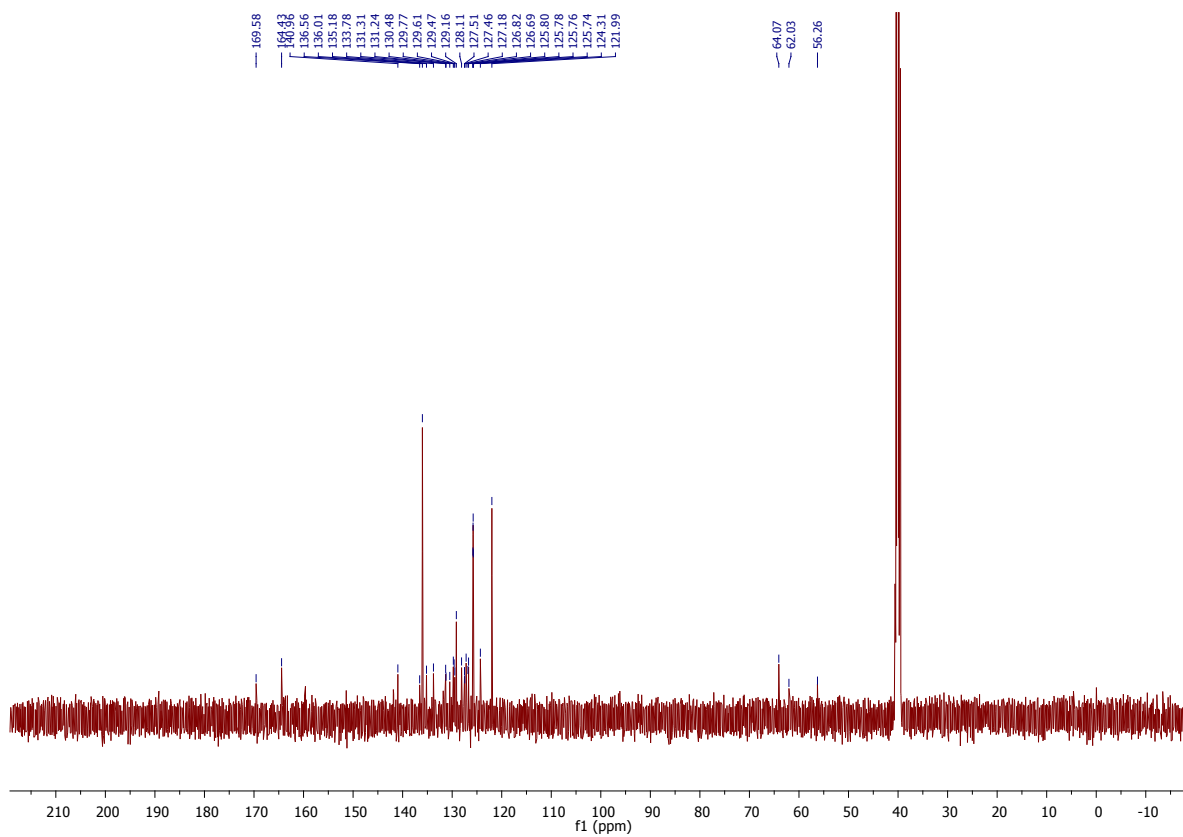

**(+)-(3S,11cS)-4-Allyl-3-methyl-4,5-dihydro-3H-dinaphtho[2,1-c:1',2'-e]azepine**

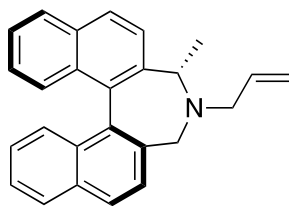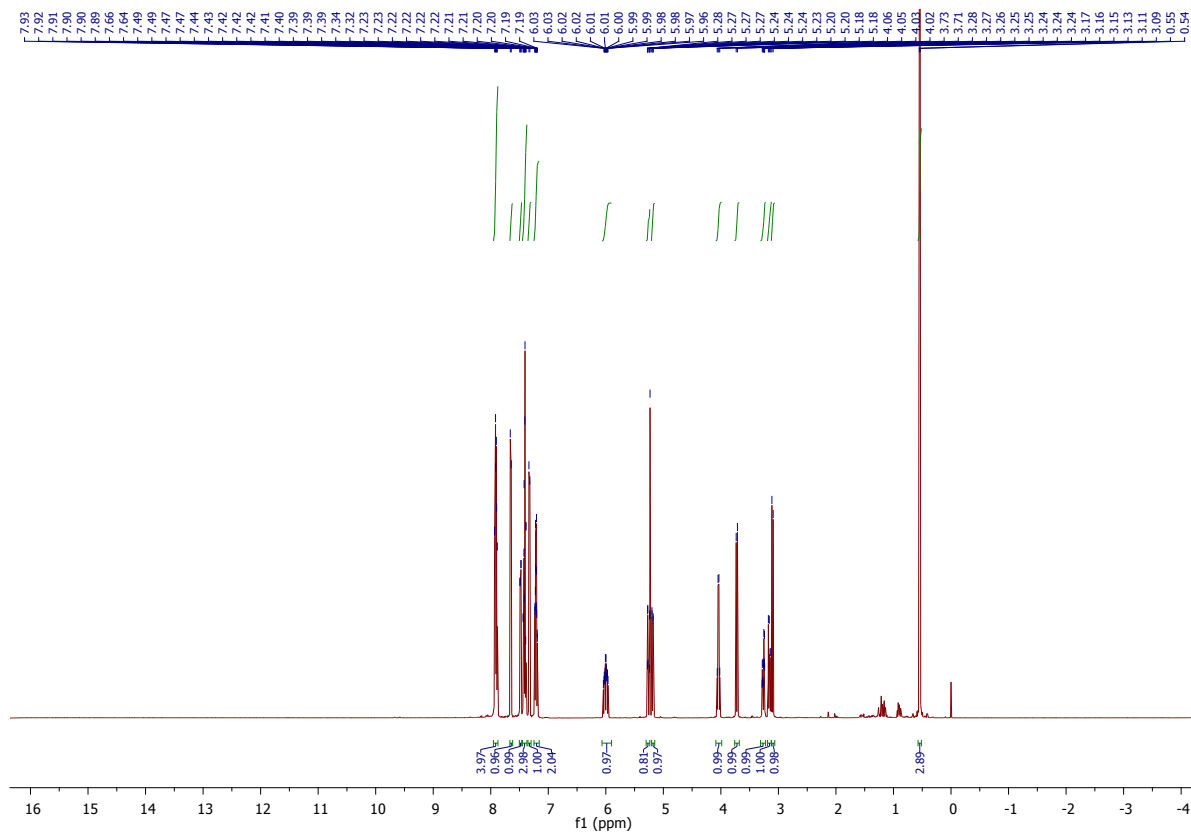

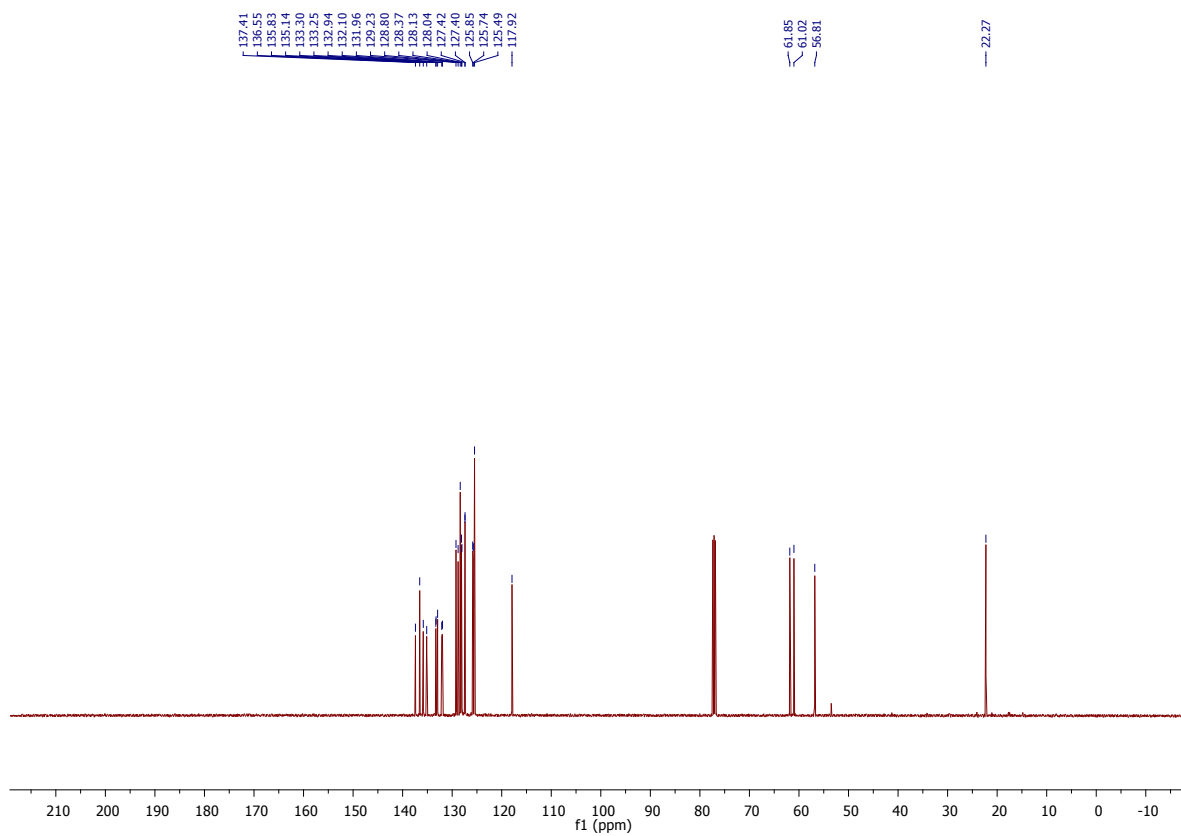

**(+)-(3S,11cS)-3-Methyl-4,5-dihydro-3H-dinaphtho[2,1-c:1',2'-e]azepine**

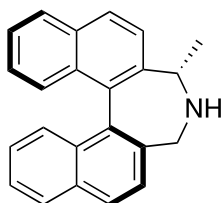

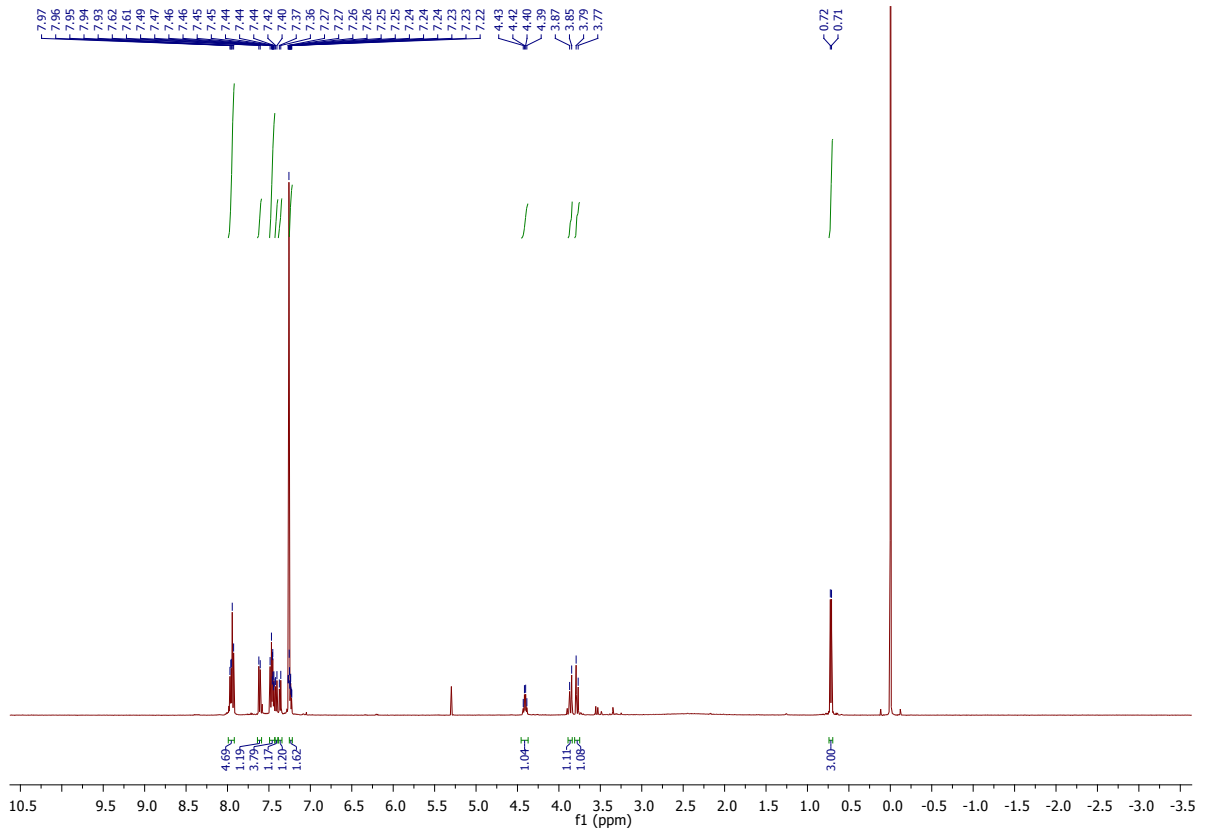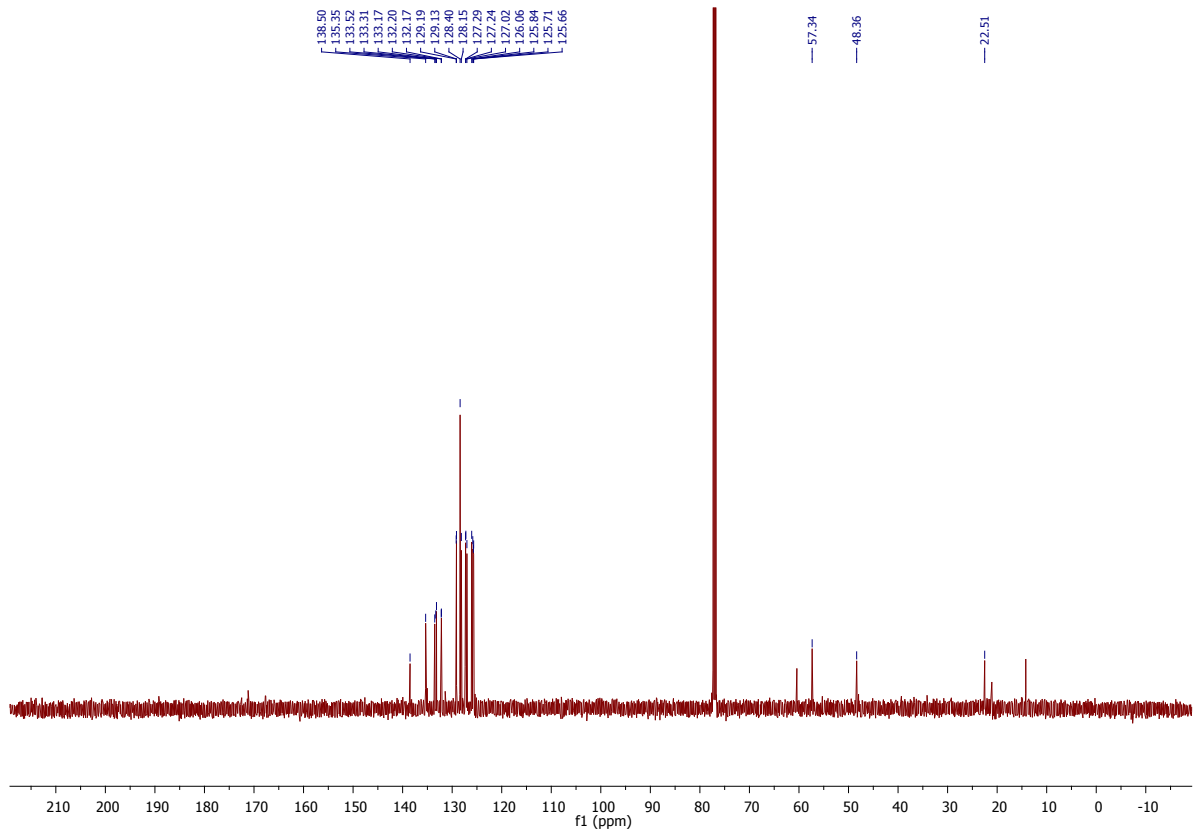



***tert*-Butyl 2-((3*S*,11*S*)-4-allyl-4,5-dihydro-3*H*-dinaphtho[2,1-*c*:1',2'-*e*] azepin-3-yl) acetate (+)-28**

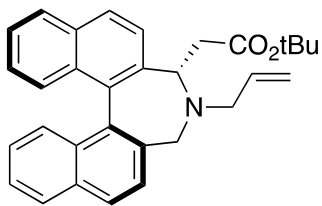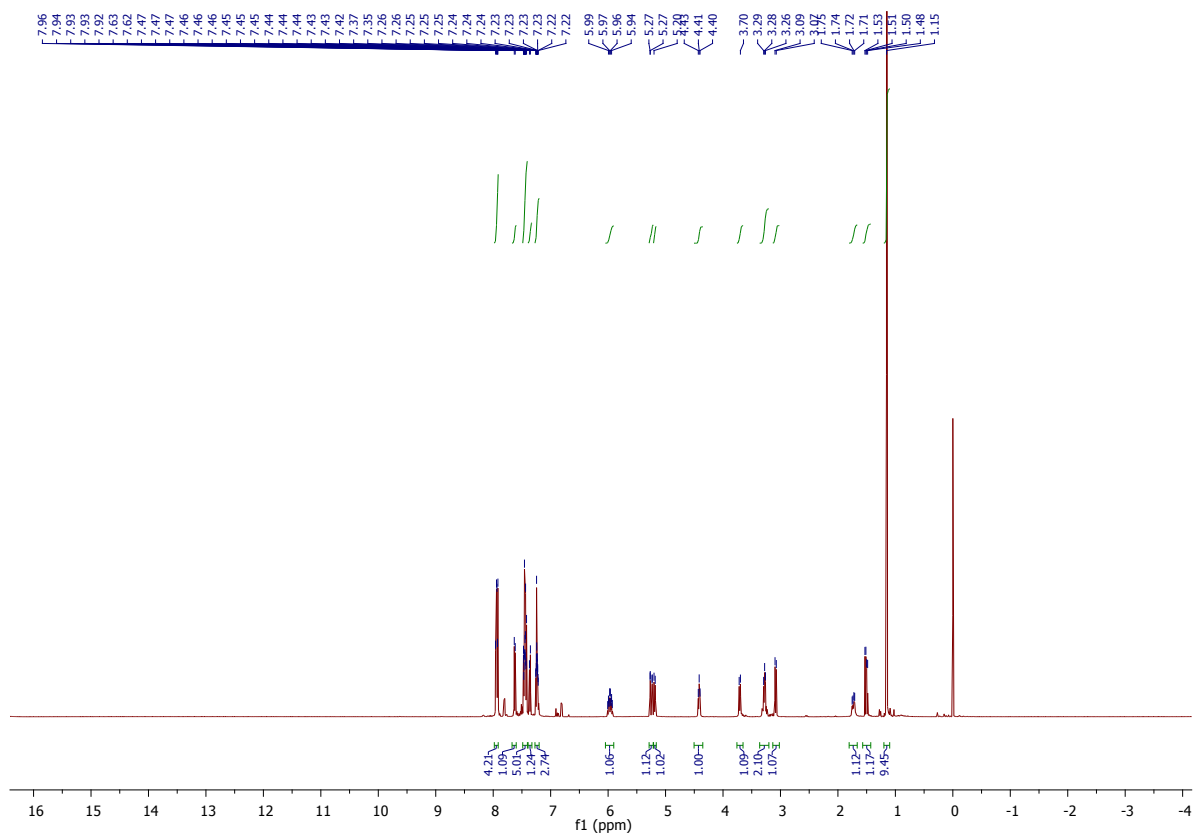

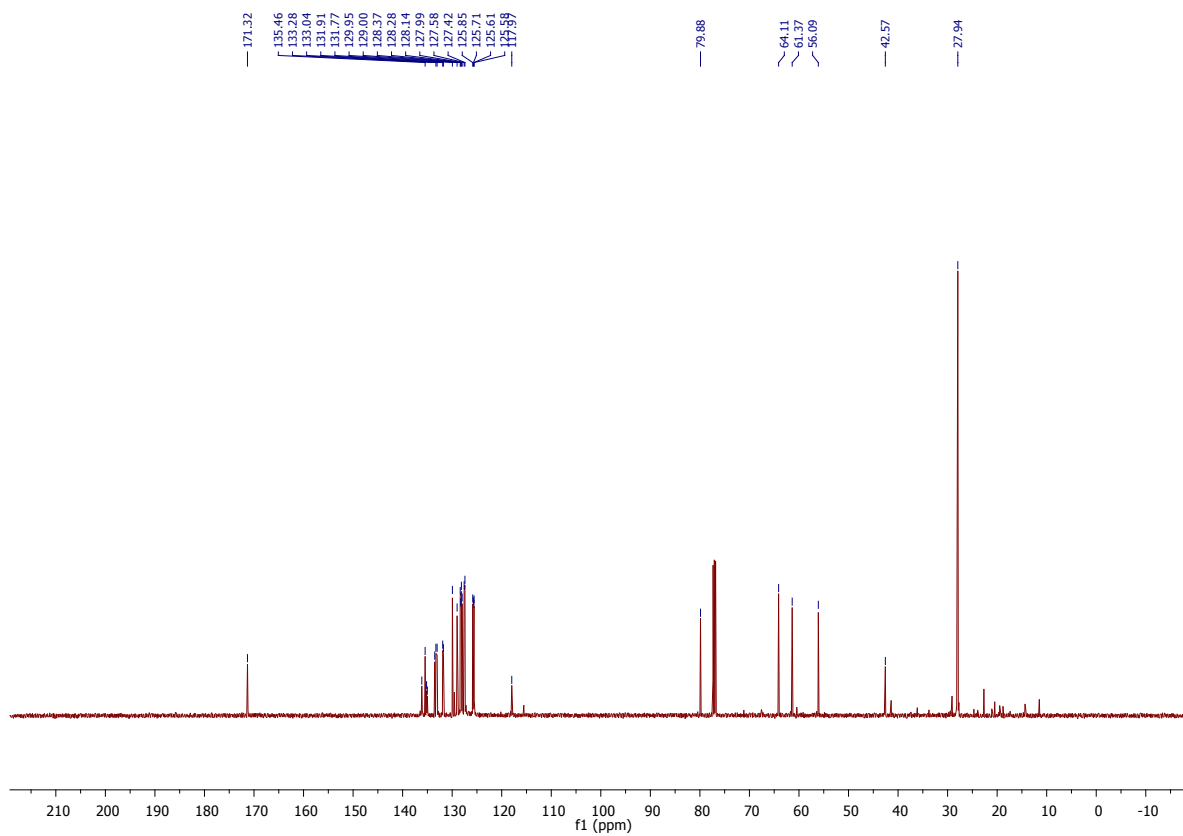

***tert*-Butyl 2-((3*S*,11*cS*)-4,5-dihydro-3*H*-dinaphtho[2,1-*c*:1',2'-*e*]azepin-3-yl) acetate (+)-  
30**

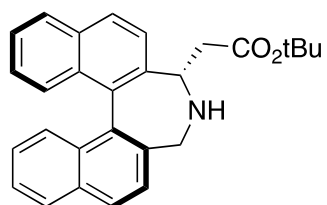

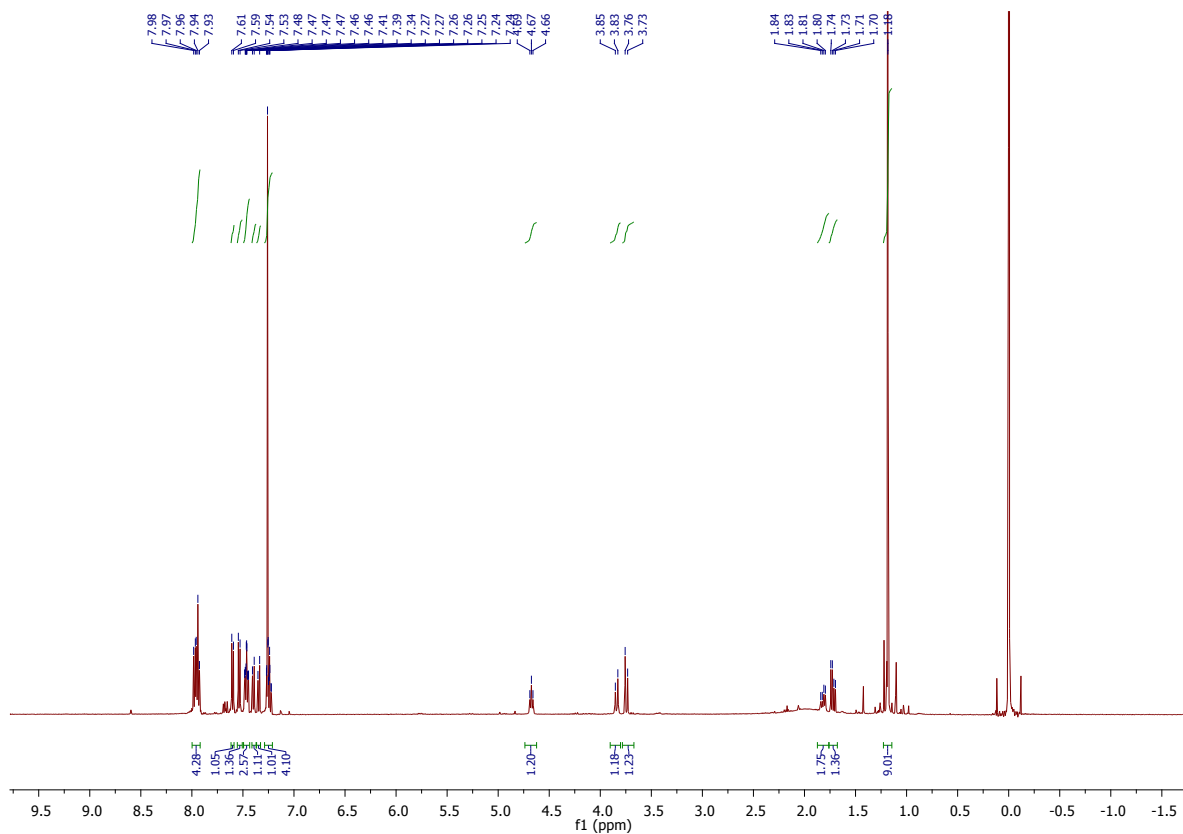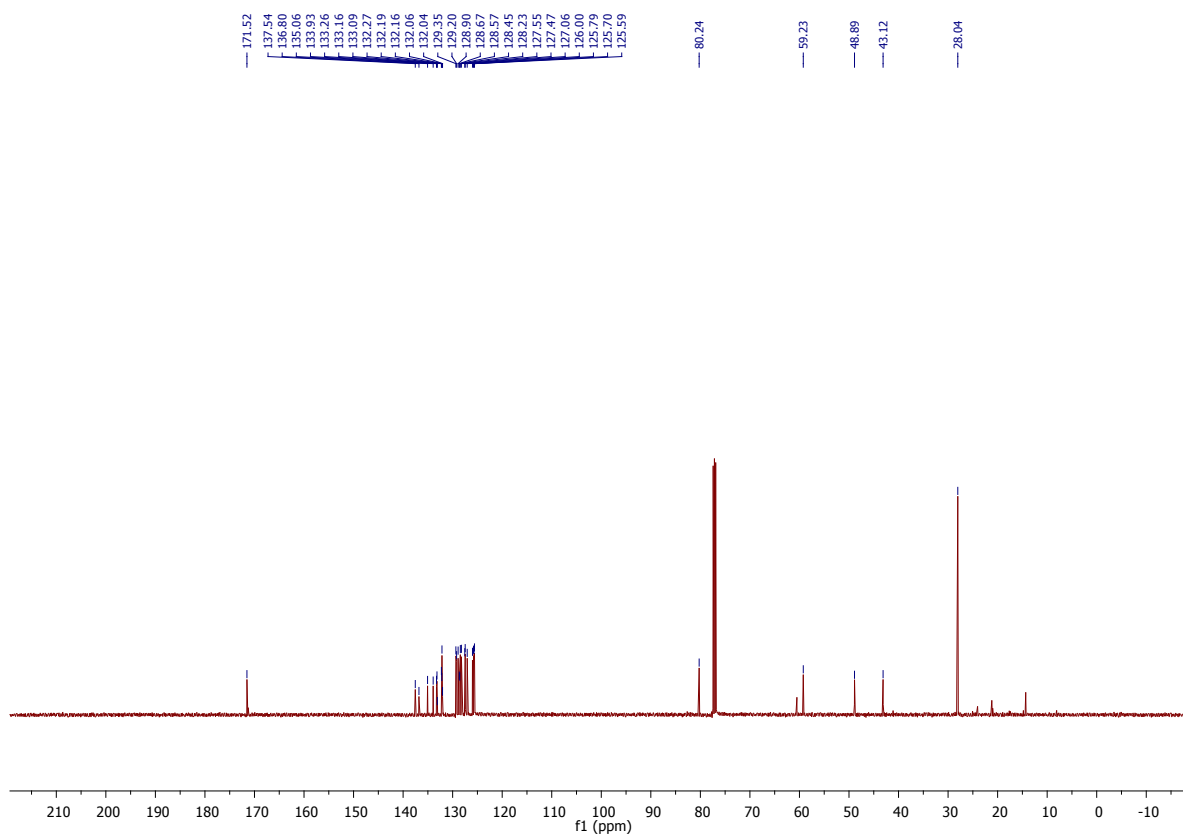

2-((3S,11cS)-4,5-dihydro-3H-dinaphtho[2,1-c:1',2'-e]azepin-3-yl)acetic acid (+)-32

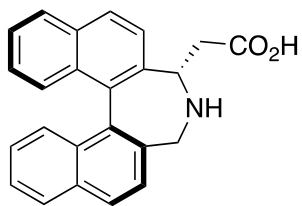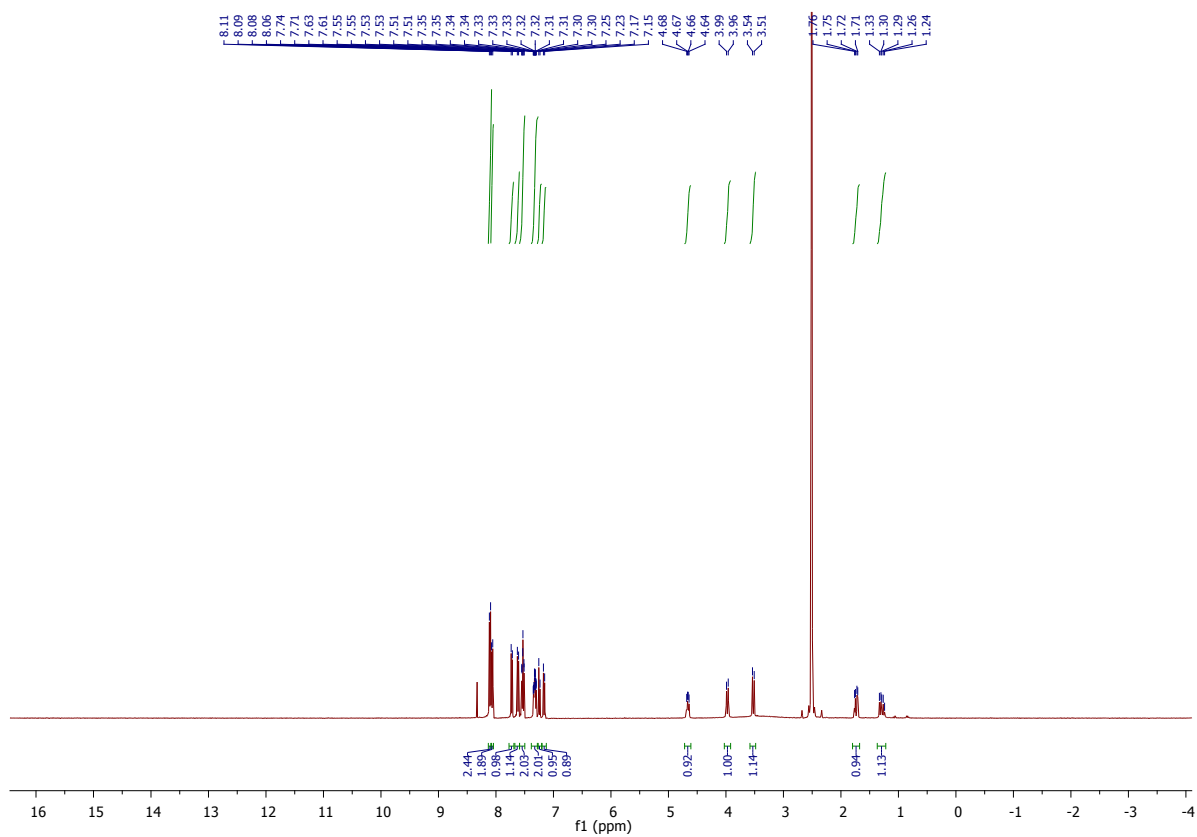

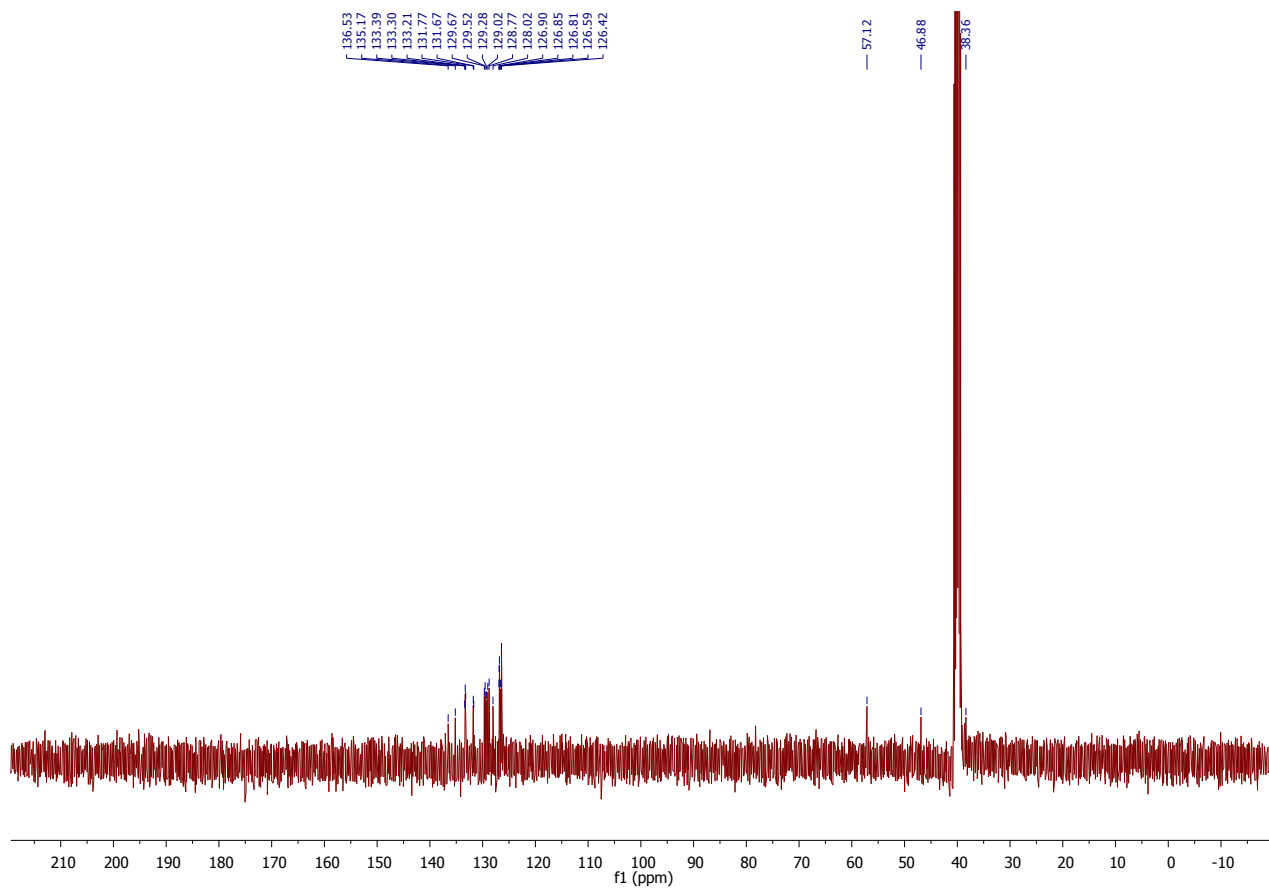

**2-((3S,11cS)-4,5-Dihydro-3H-dinaphtho[2,1-c:1',2'-e]azepin-3-yl)acetic acid (+)-32.HCl**

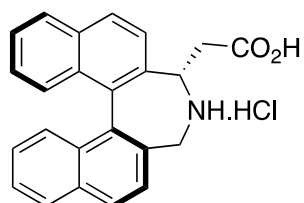

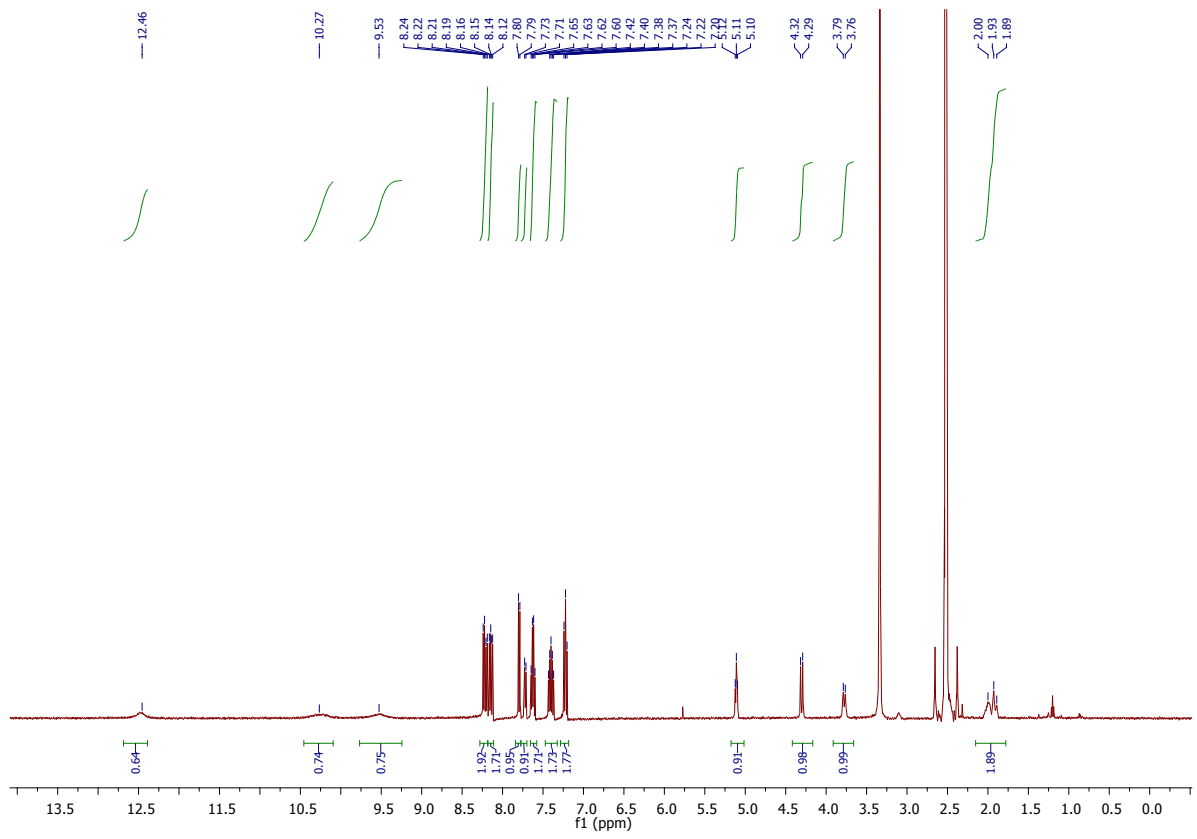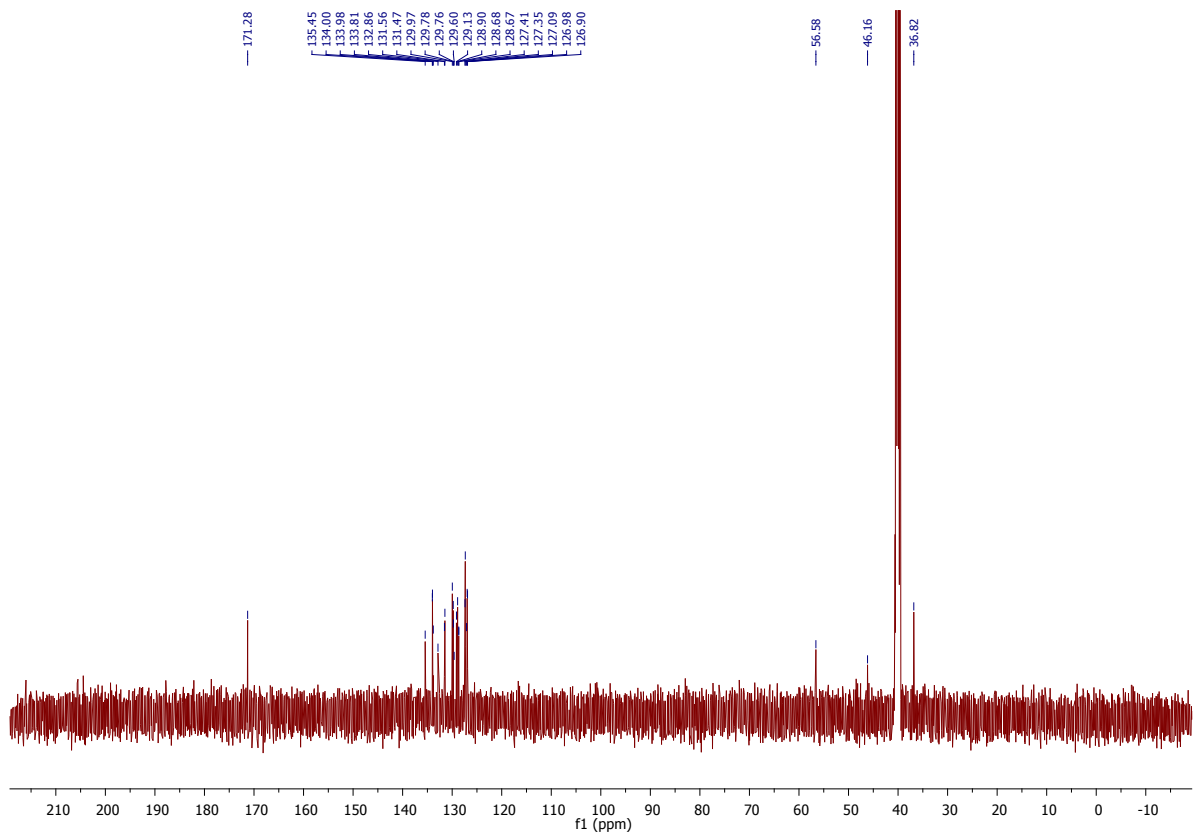

***tert*-Butyl 2-((3*R*,11*c*S)-4-allyl-4,5-dihydro-3*H*-dinaphtho[2,1-*c*:1',2'-*e*]azepin-3-yl)-2-methylpropanoate (+)-29**

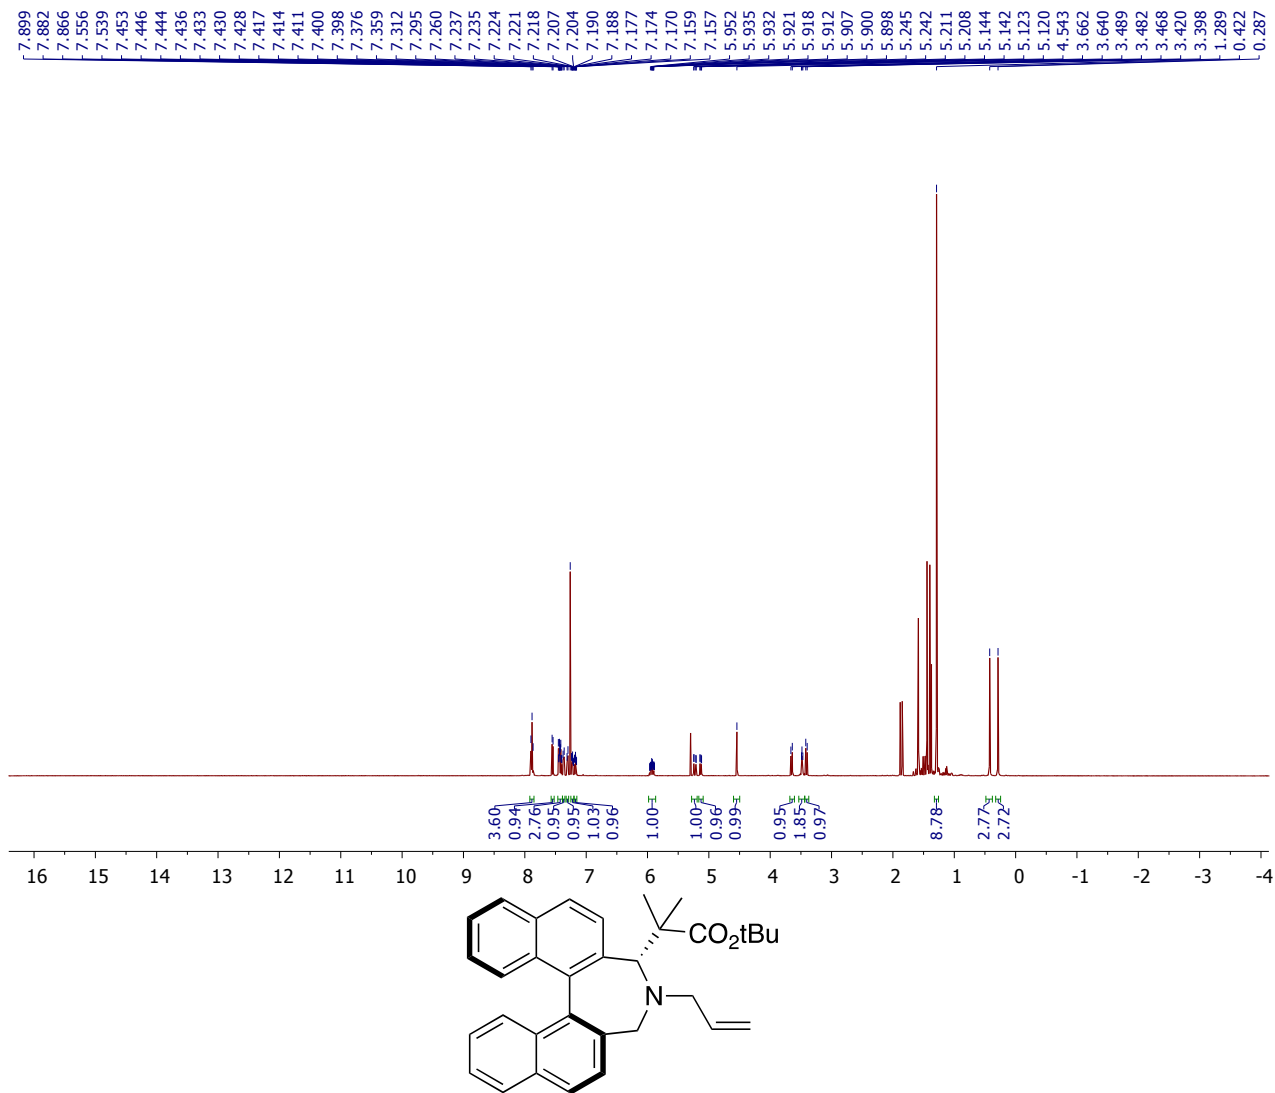

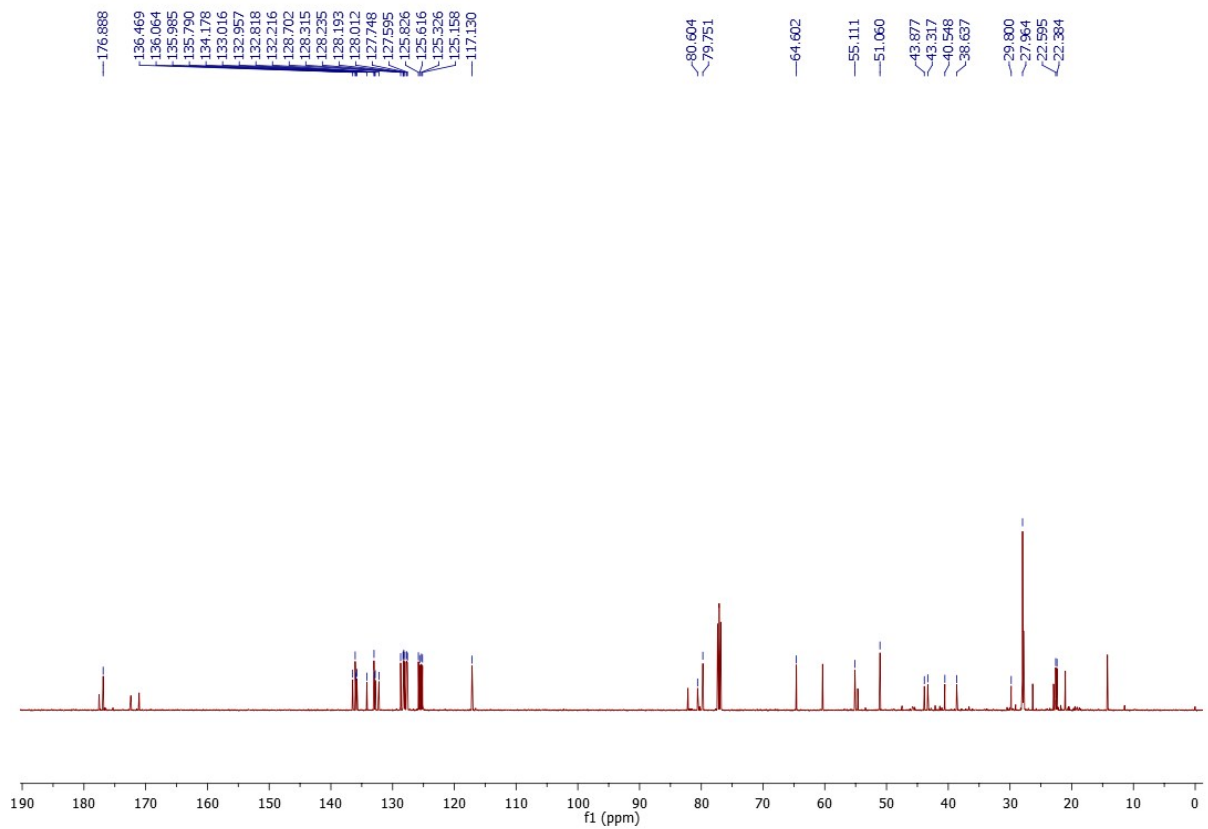

**tert-Butyl 2-((3R,11S)-4,5-dihydro-3H-dinaphtho[2,1-c:1',2'-e]azepin-3-yl)-2-methylpropanoate (+)-31**

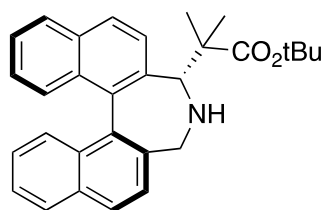



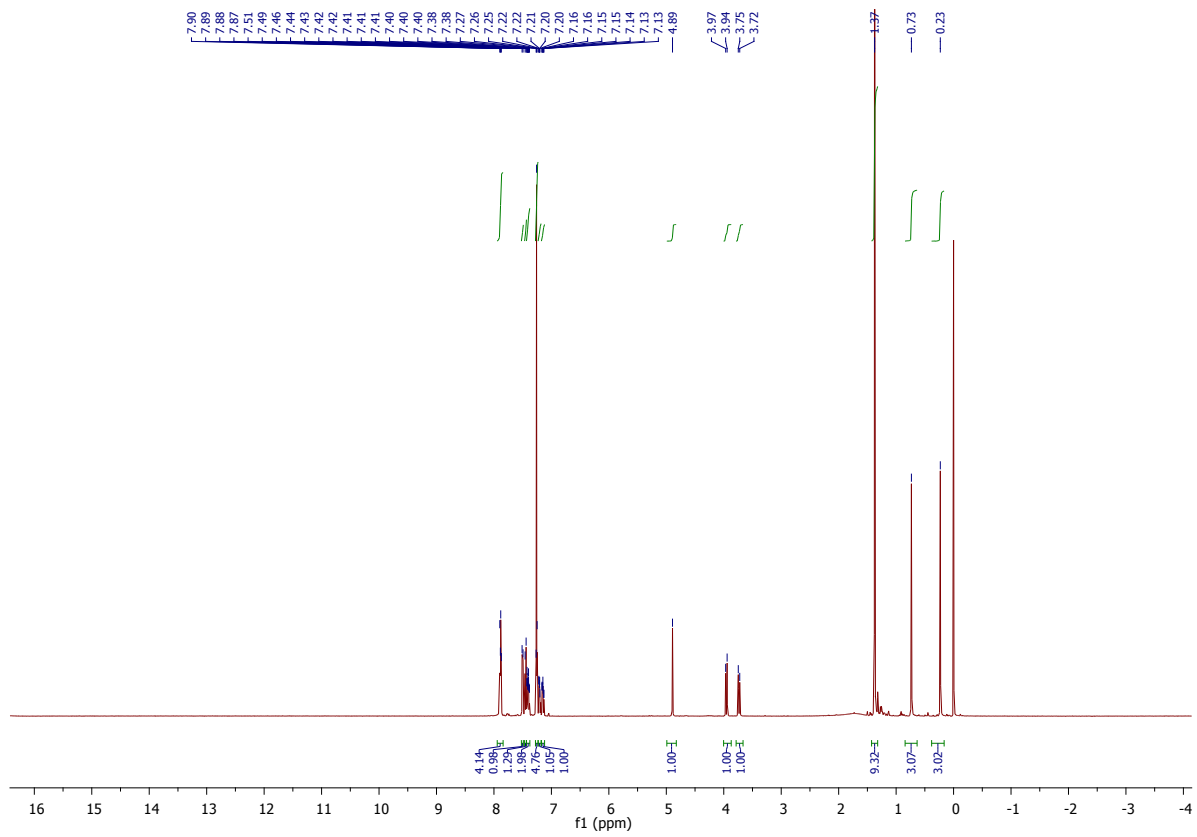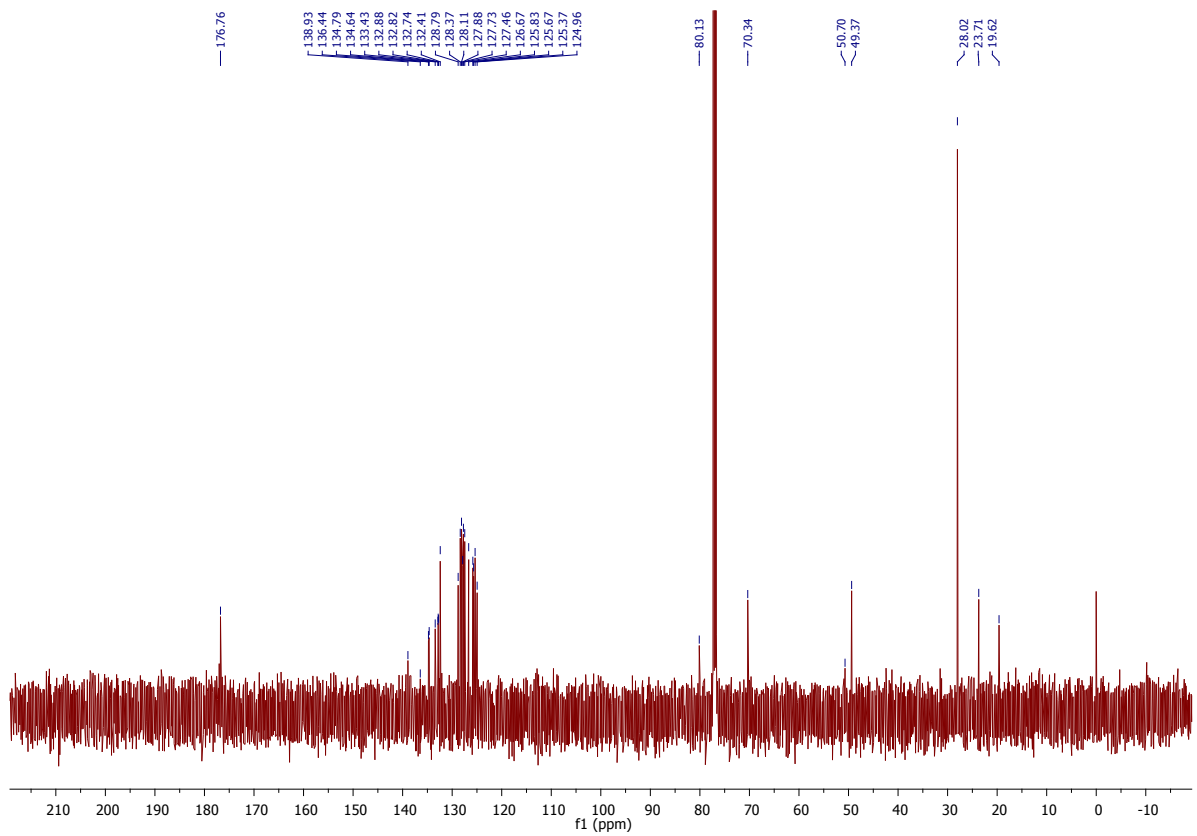

2-((3R,11cS)-4,5-Dihydro-3H-dinaphtho[2,1-c:1',2'-e]azepin-3-yl)-2-methylpropanoic acid hydrochloride (+)-33.HCl

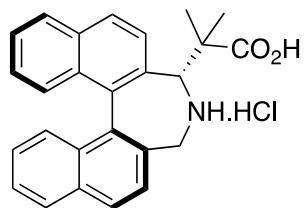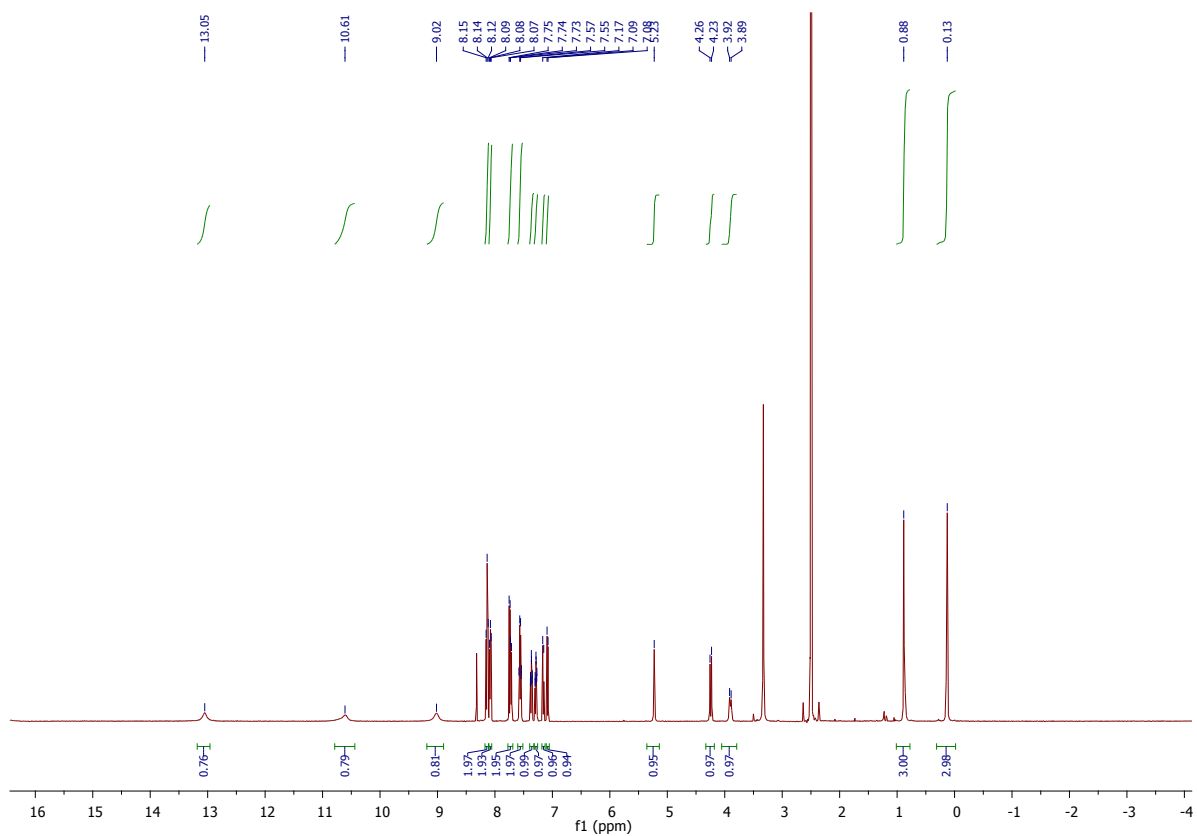

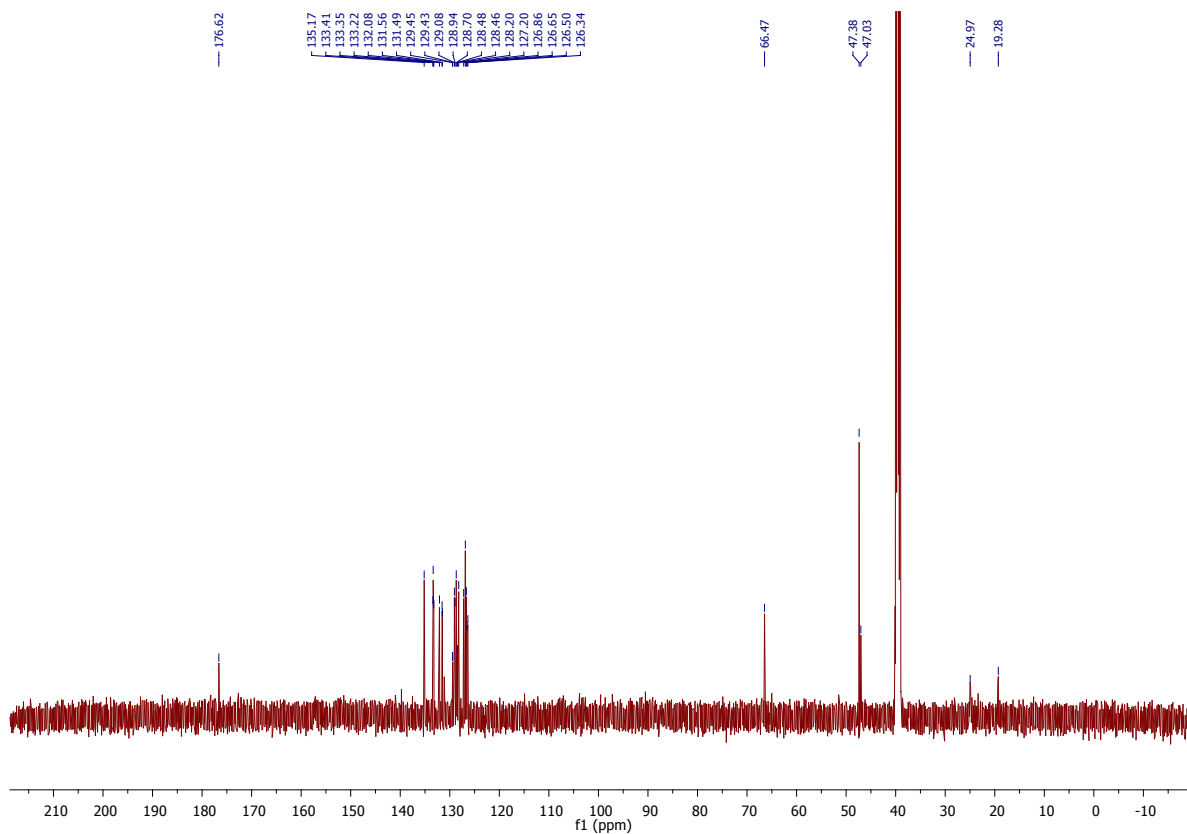

2-((3S,11cS)-4,5-dihydro-3H-dinaphtho[2,1-c:1',2'-e]azepin-3-yl)-2-methylpropanoic acid (+)-33

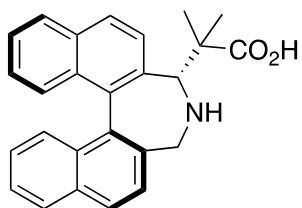

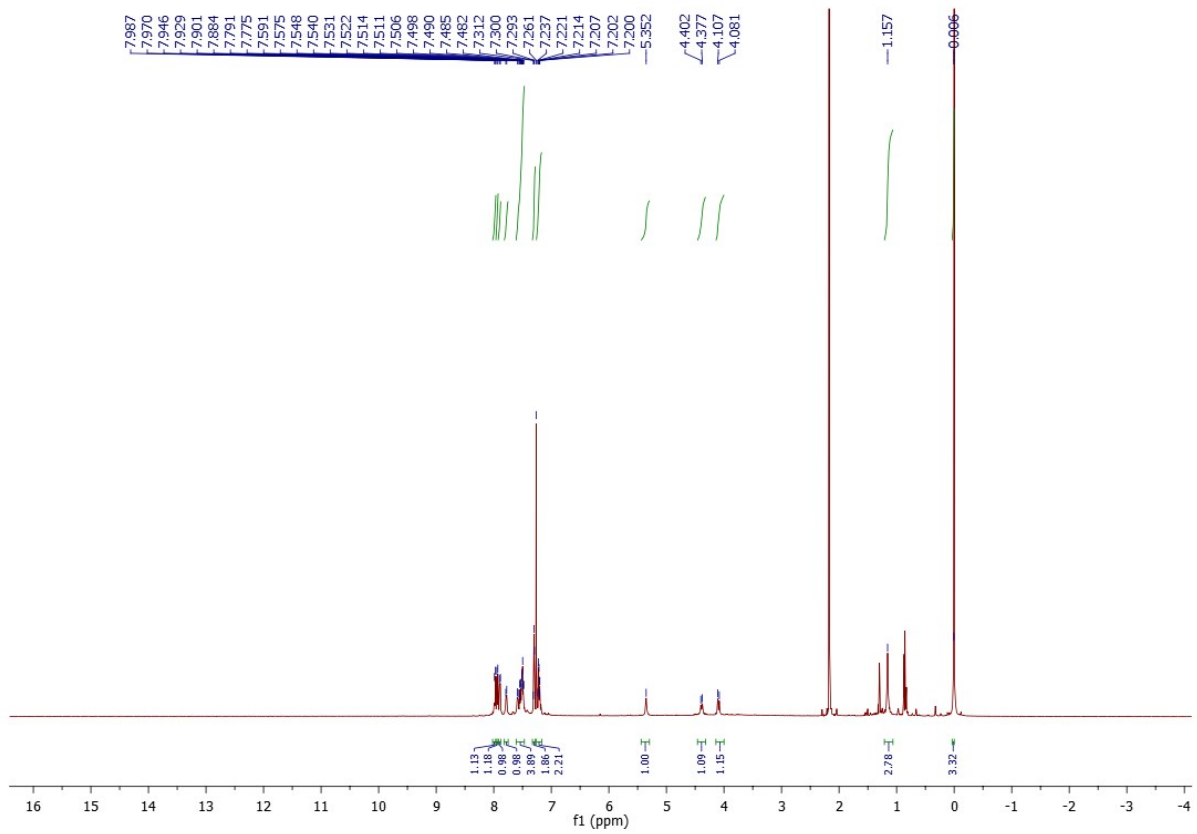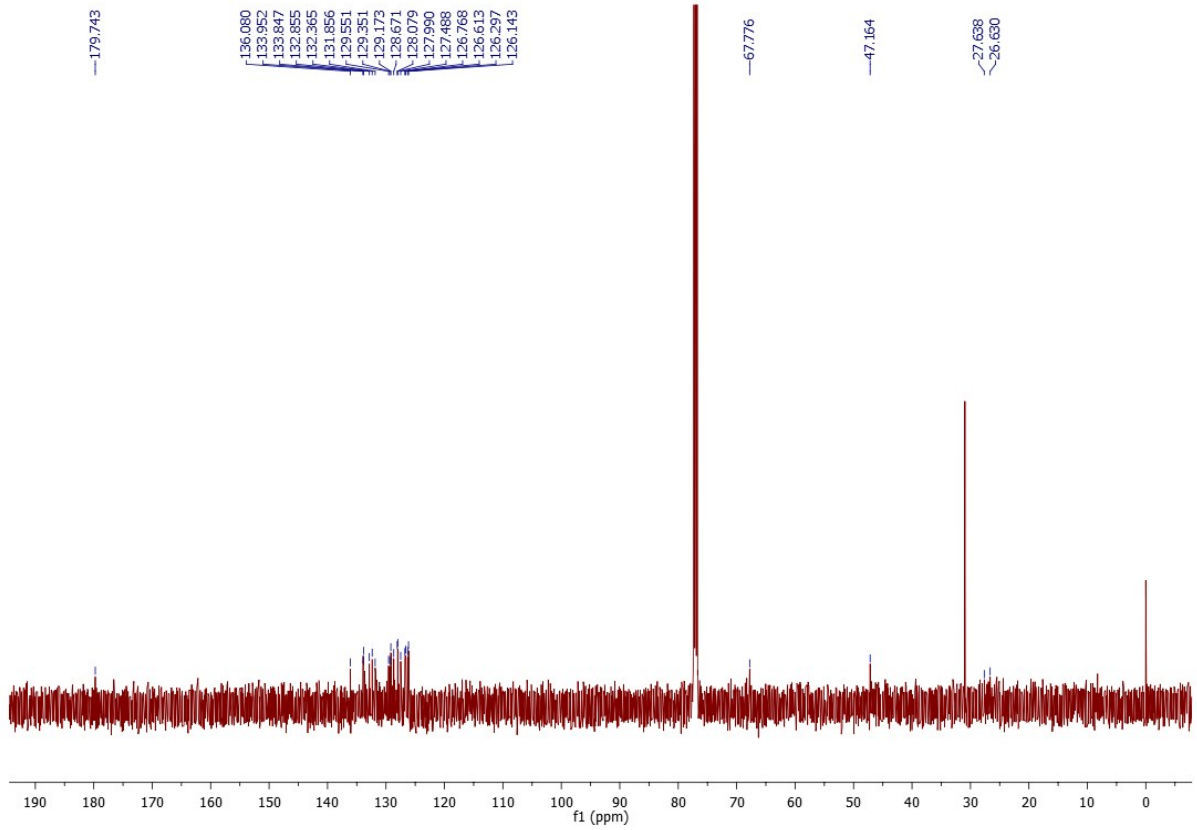

**(S)-Tert-butyl 3H-dinaphtho[2,1-c:1',2'-e]azepine-4(5H)-carboxylate (-)-13**

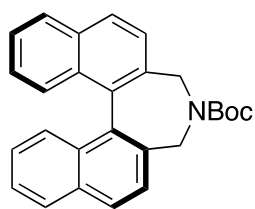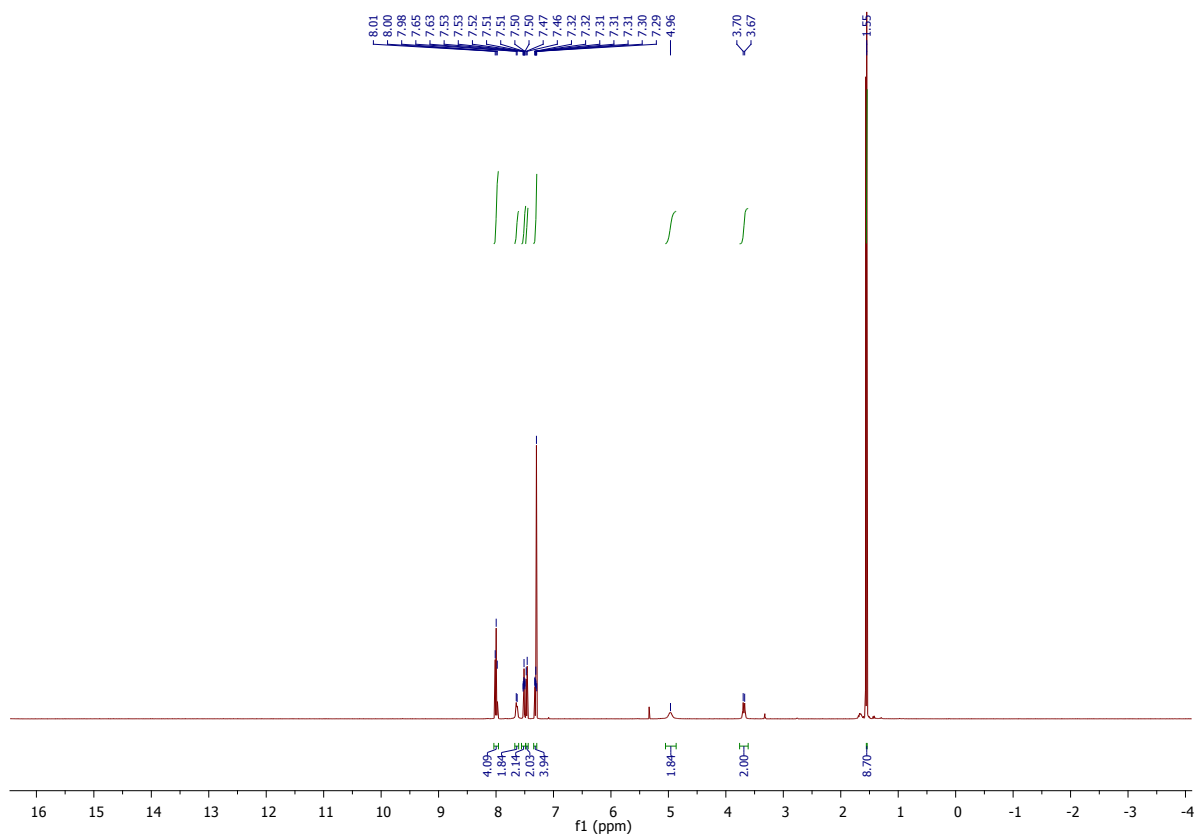

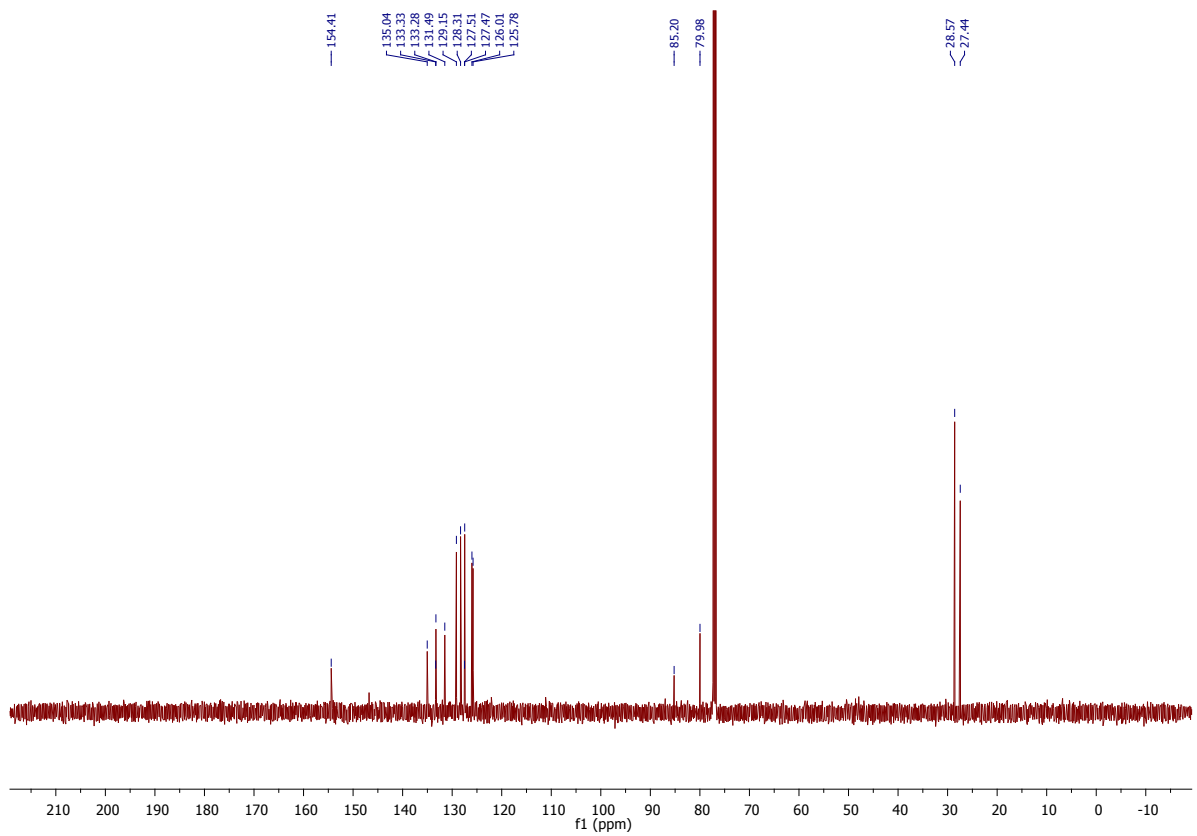

**(3R,11S)-4-Tert-butyl**  
**dicarboxylate (-)-15**

**3-ethyl**

**3H-dinaphtho[2,1-c:1',2'-e]azepine-3,4(5H)-**

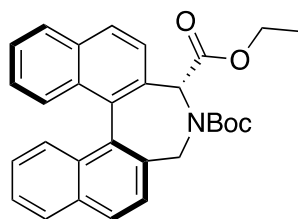

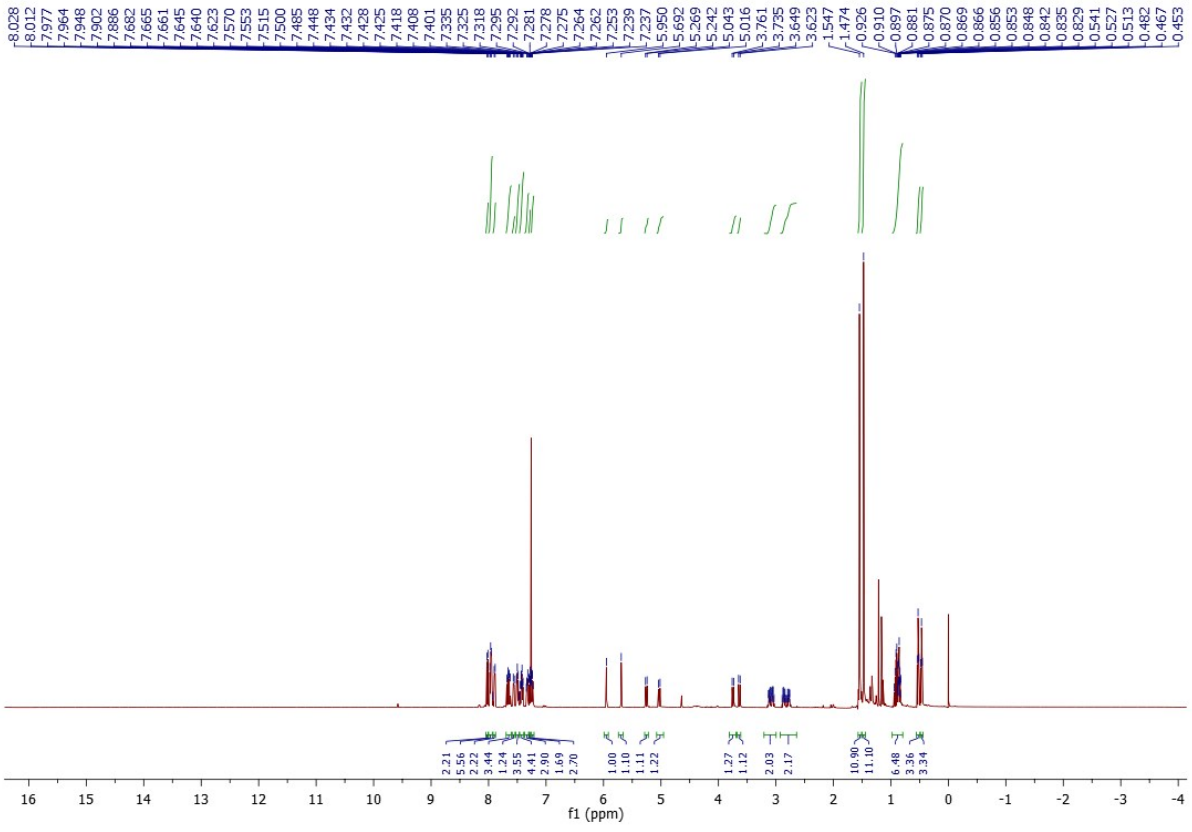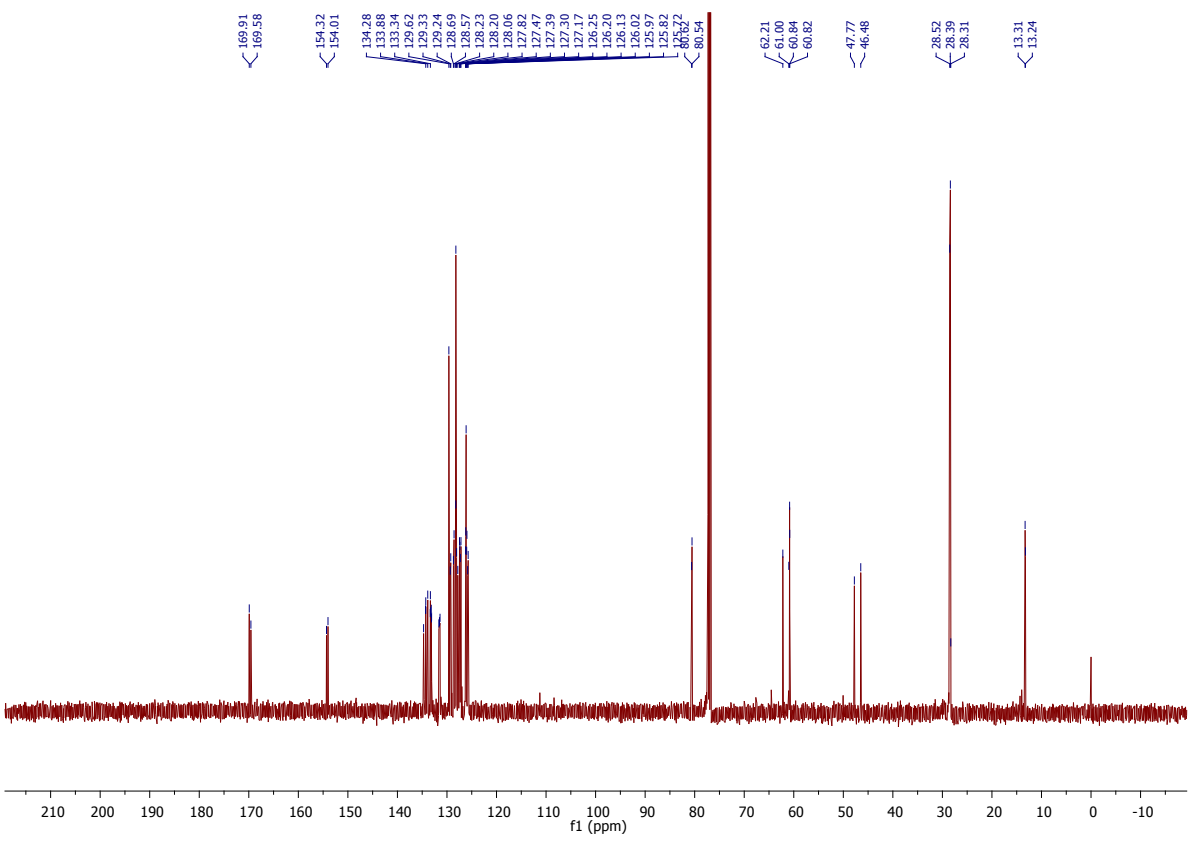

(3R,11cS)-Ethyl 4,5-dihydro-3H-dinaphtho[2,1-c:1',2'-e]azepine-3-carboxylate (+)-17

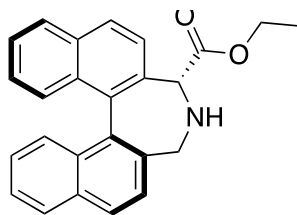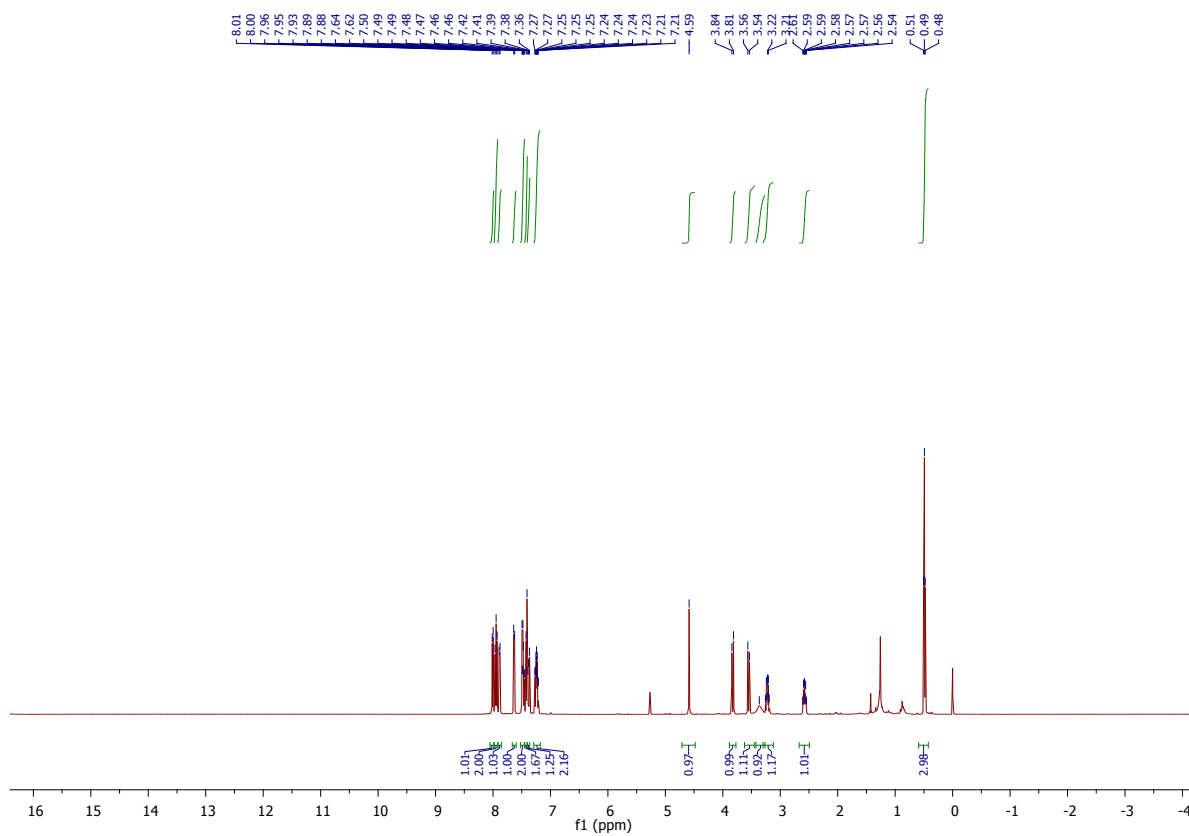



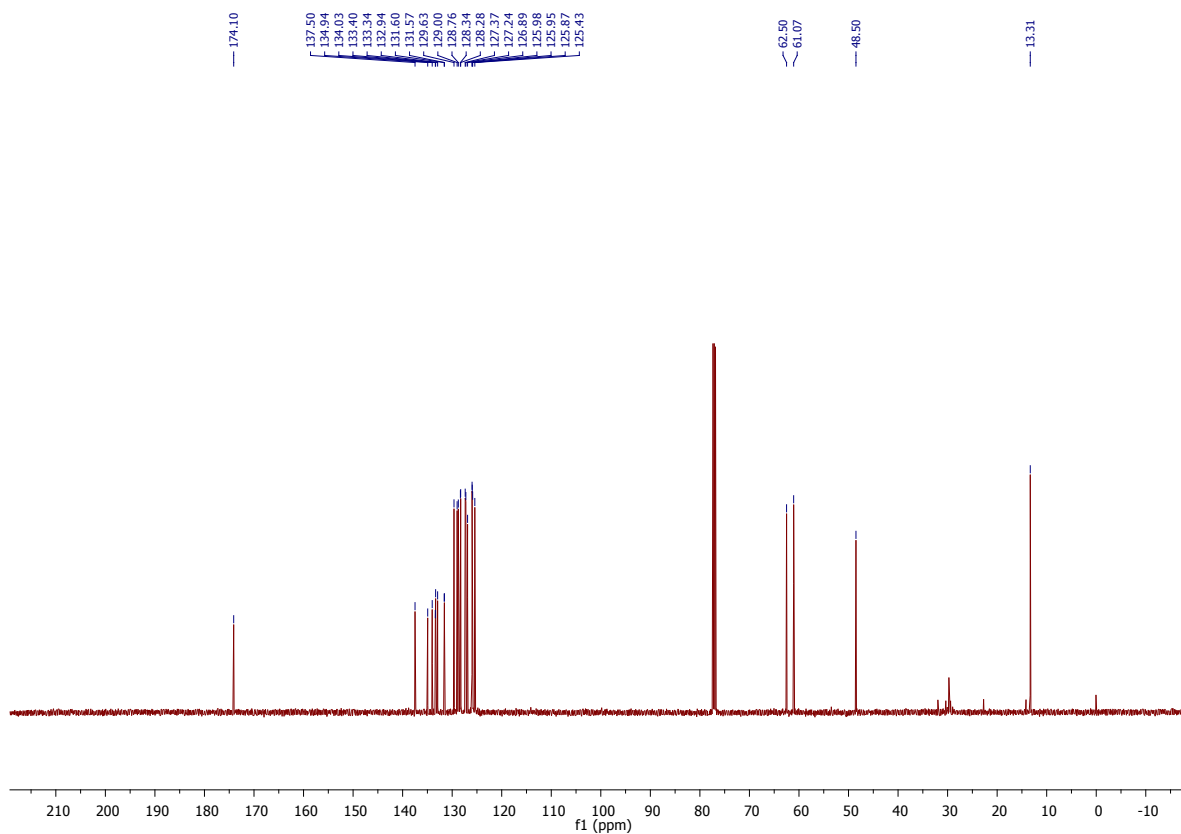

**(3R,11S)-Ethyl 4,5-dihydro-3H-dinaphtho[2,1-c:1',2'-e]azepine-3-carboxylate hydrochloride (+)-17.HCl**

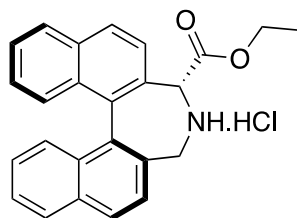

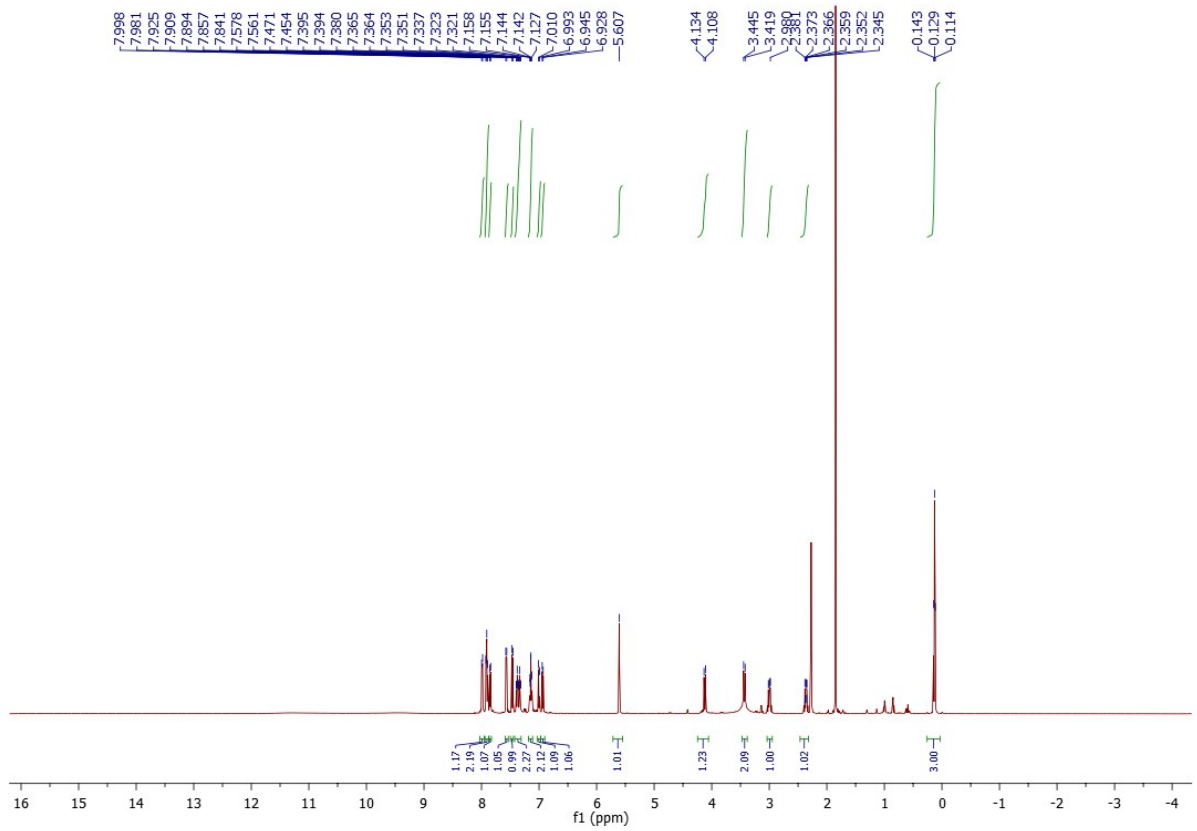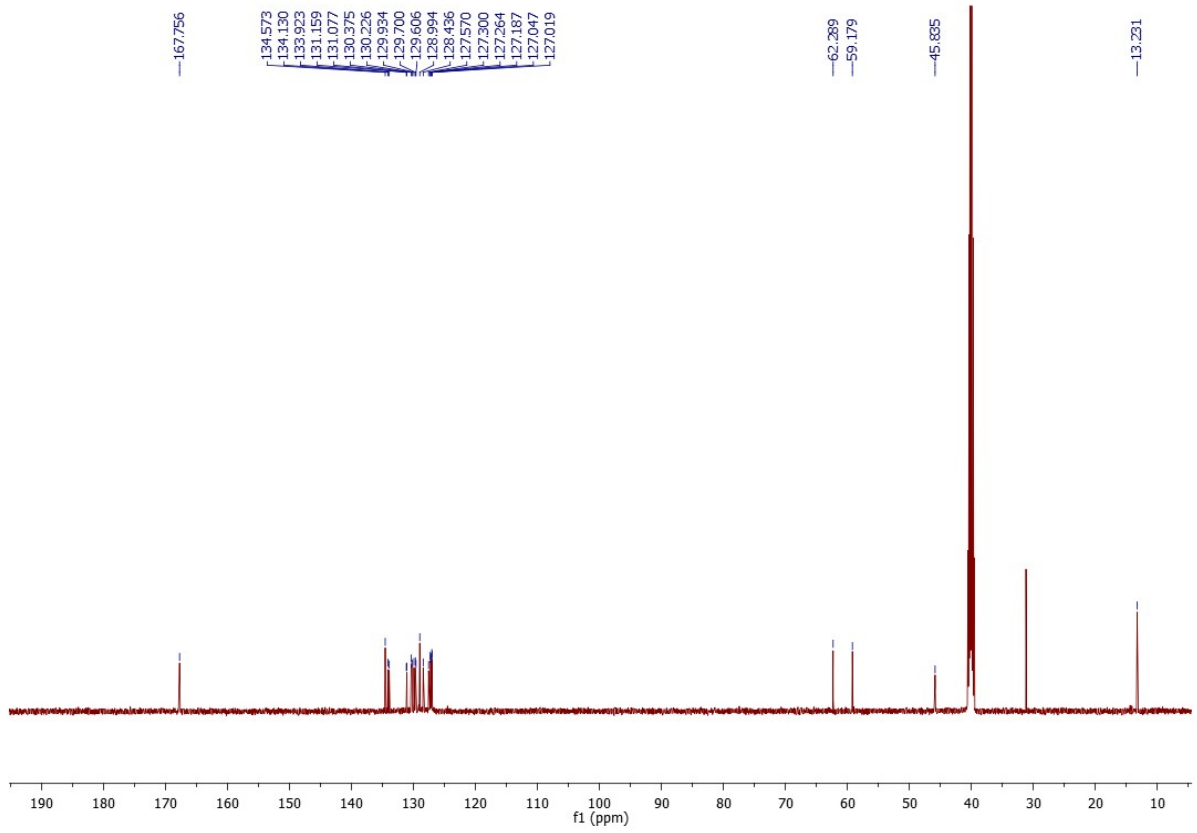

**(3R,11cS)-4-Tert-butyl 3-methyl 3H-dinaphtho[2,1-c:1',2'-e]azepine-3,4(5H)-dicarboxylate (-)-14**

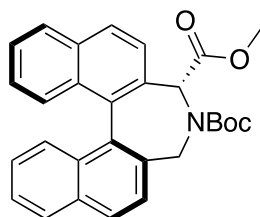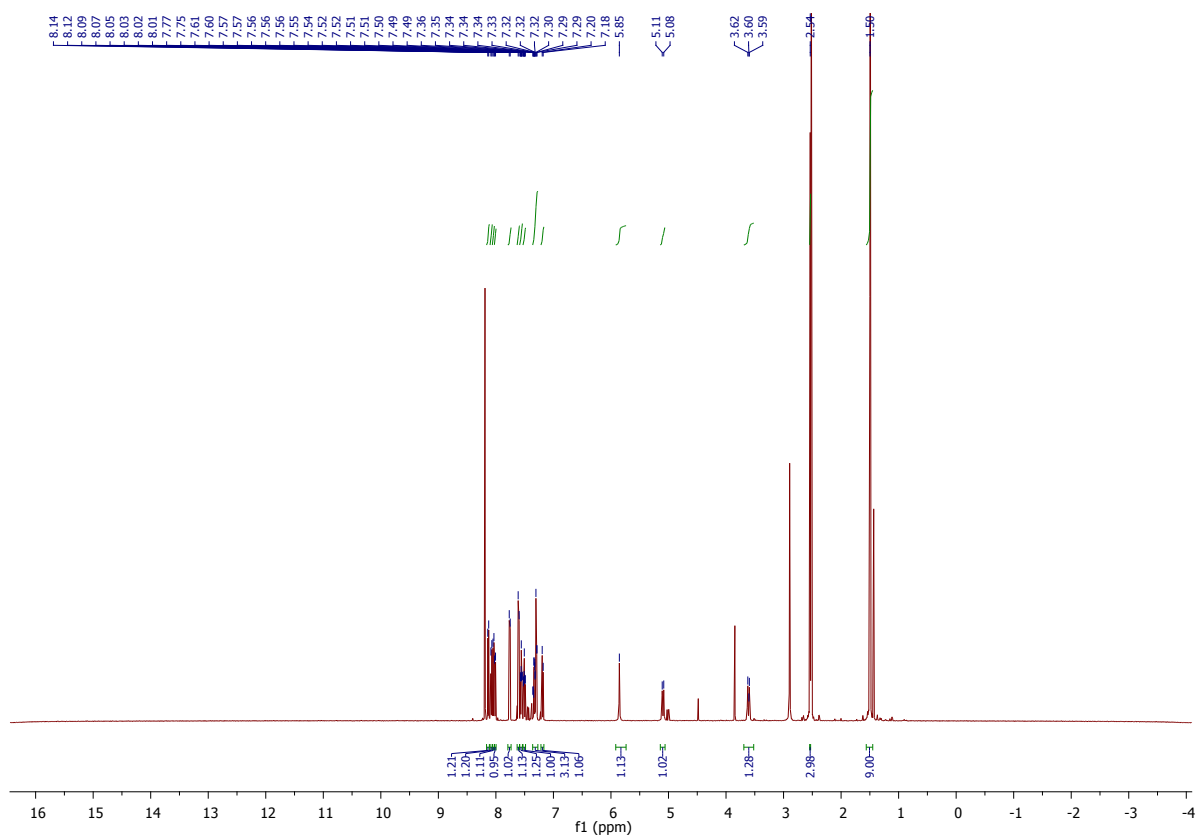

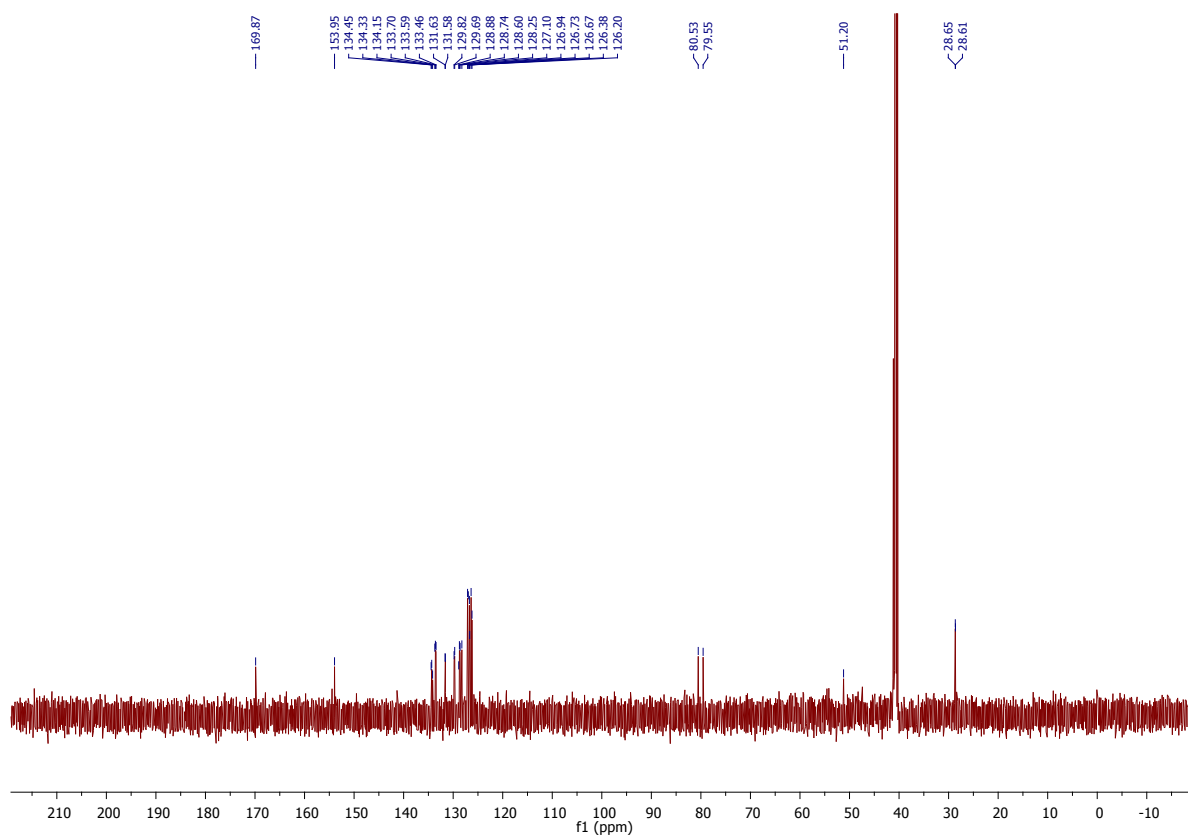

**(3R,11S)-Methyl 4,5-dihydro-3H-dinaphtho[2,1-c:1',2'-e]azepine-3-carboxylate (+)-16**

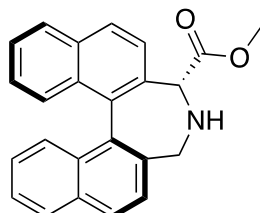

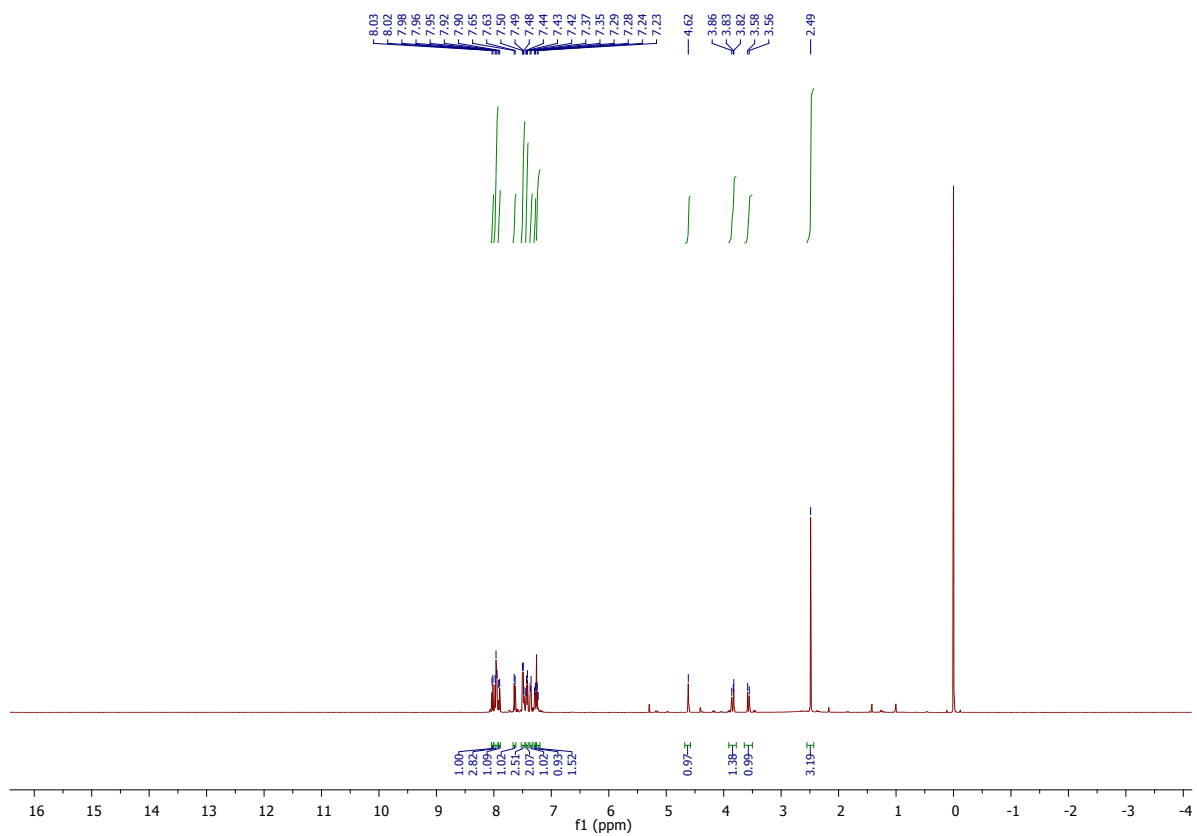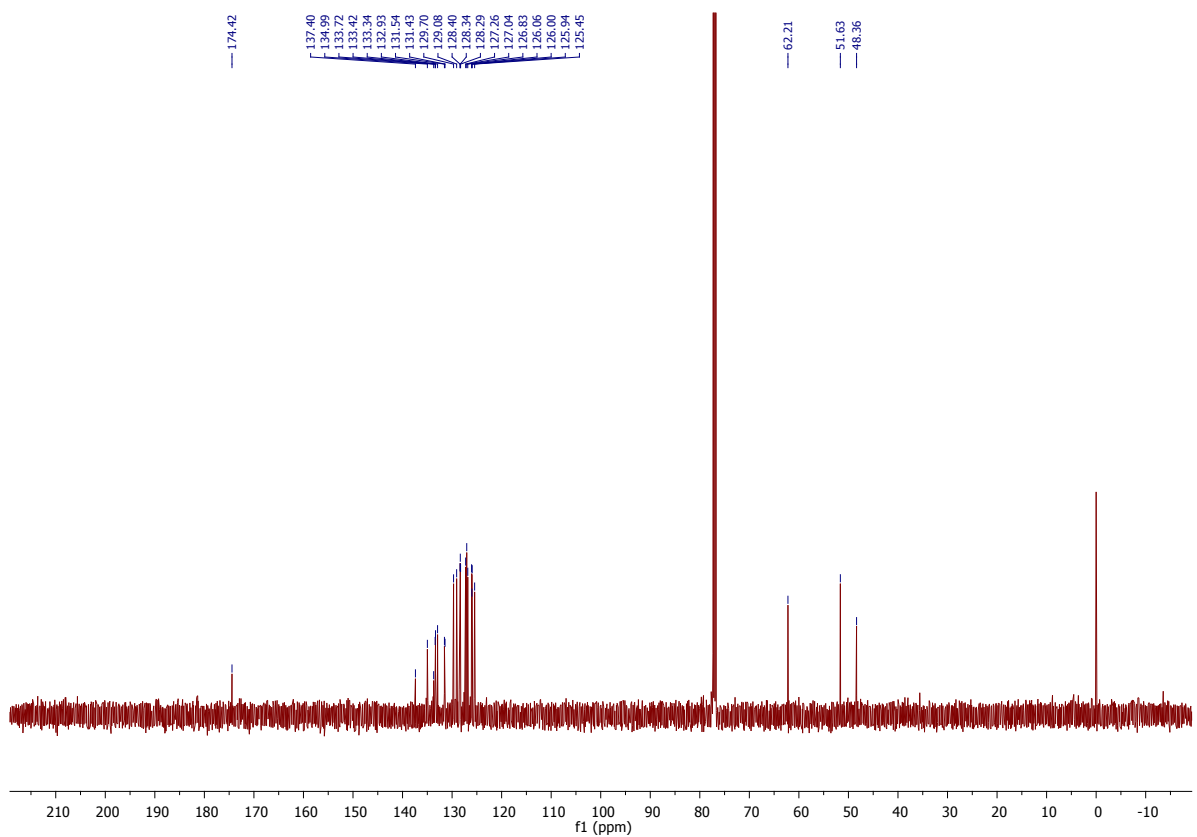

**3R,11cS)-Methyl 4,5-dihydro-3H-dinaphtho[2,1-c:1',2'-e]azepine-3-carboxylate hydrochloride (+)-16.HCl**

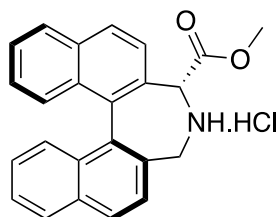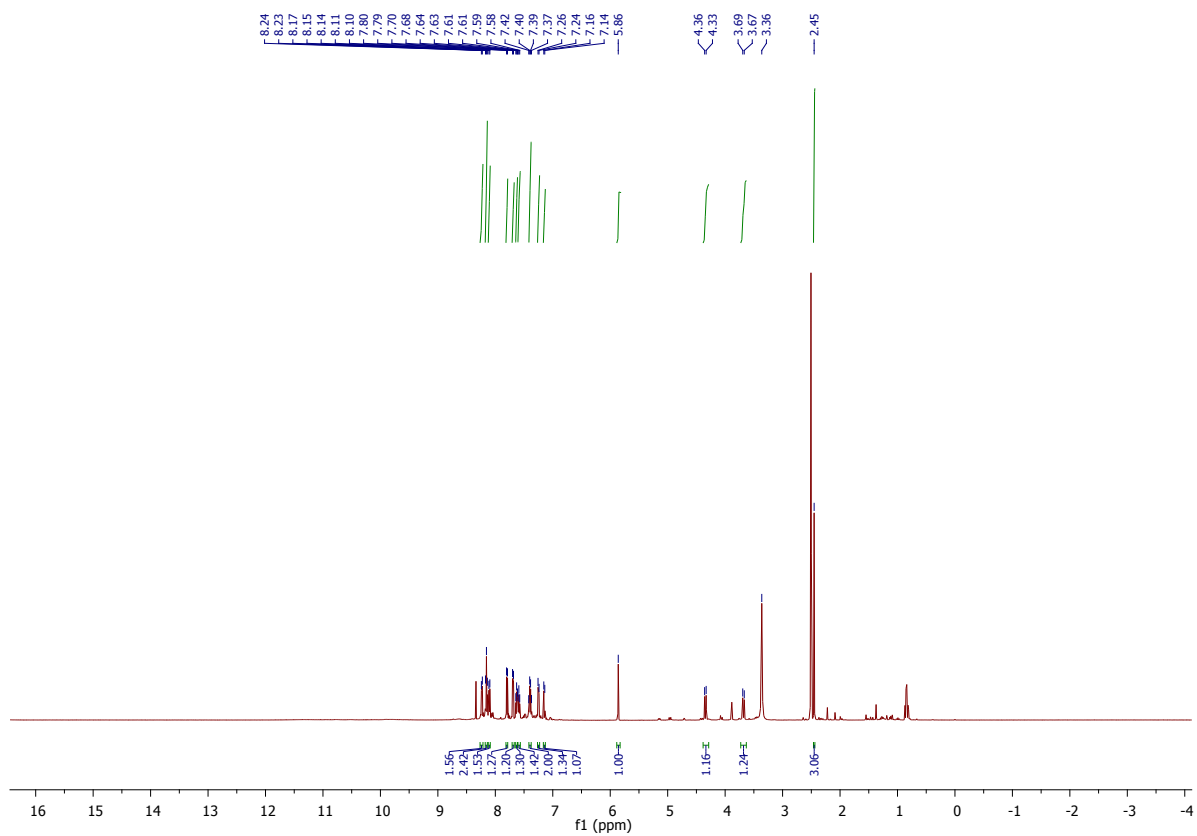

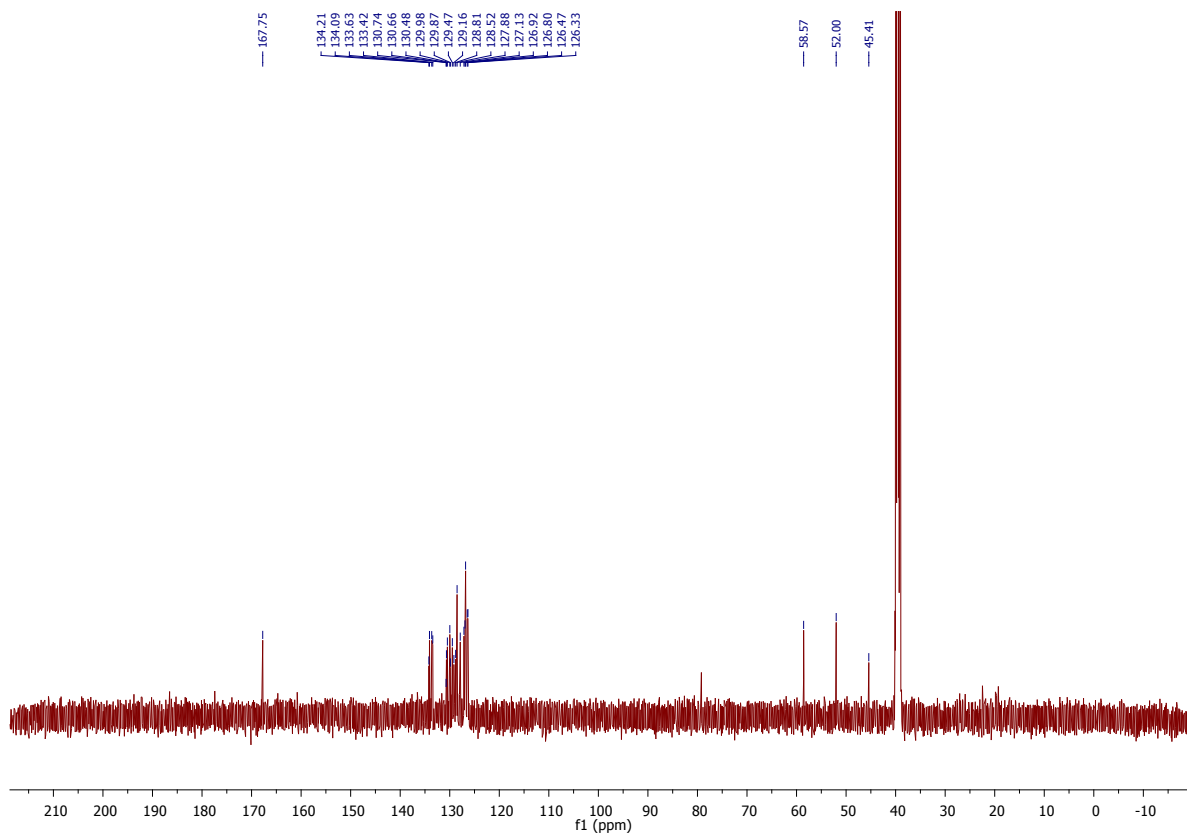

1st eluting diastereoisomer (3R,11S)-4-(Tert-butoxycarbonyl)-4,5-dihydro-3H-dinaphtho[2,1-c:1',2'-e]azepine-3-carboxylic acid (-)-18a

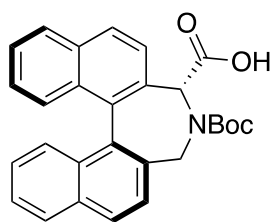

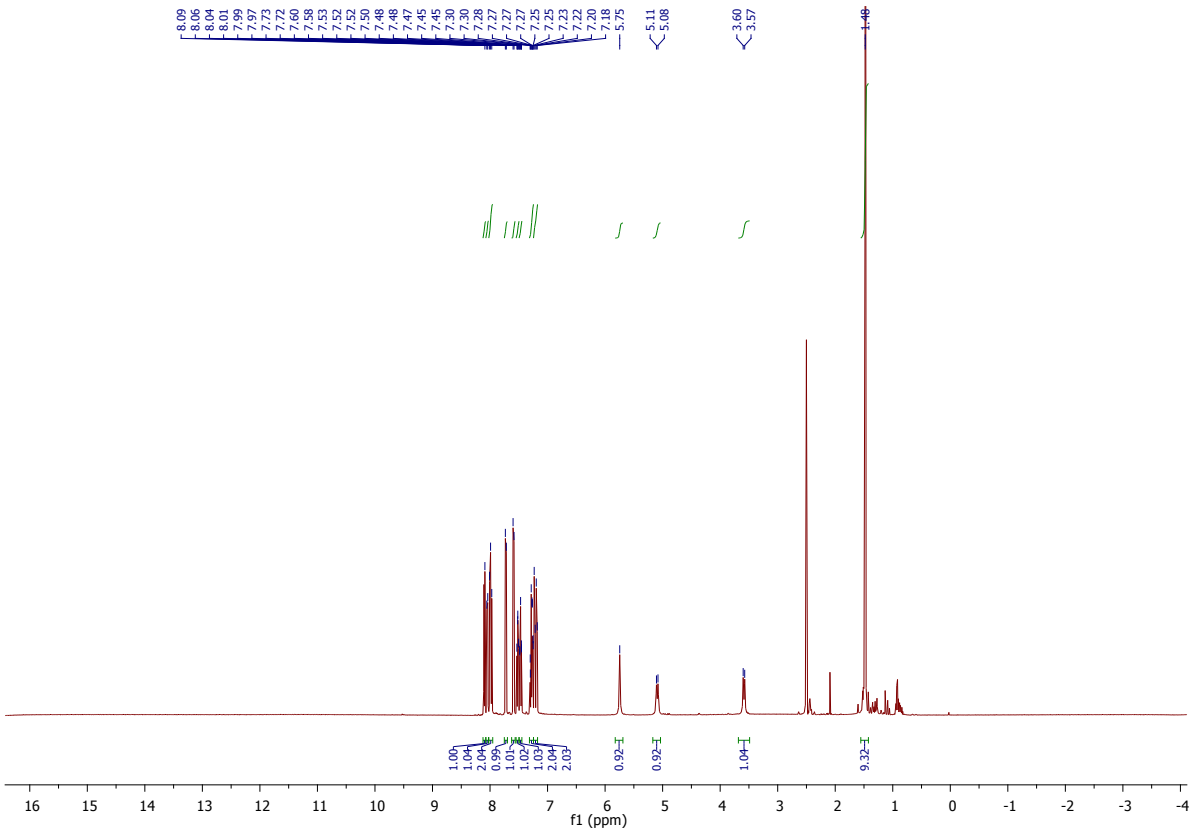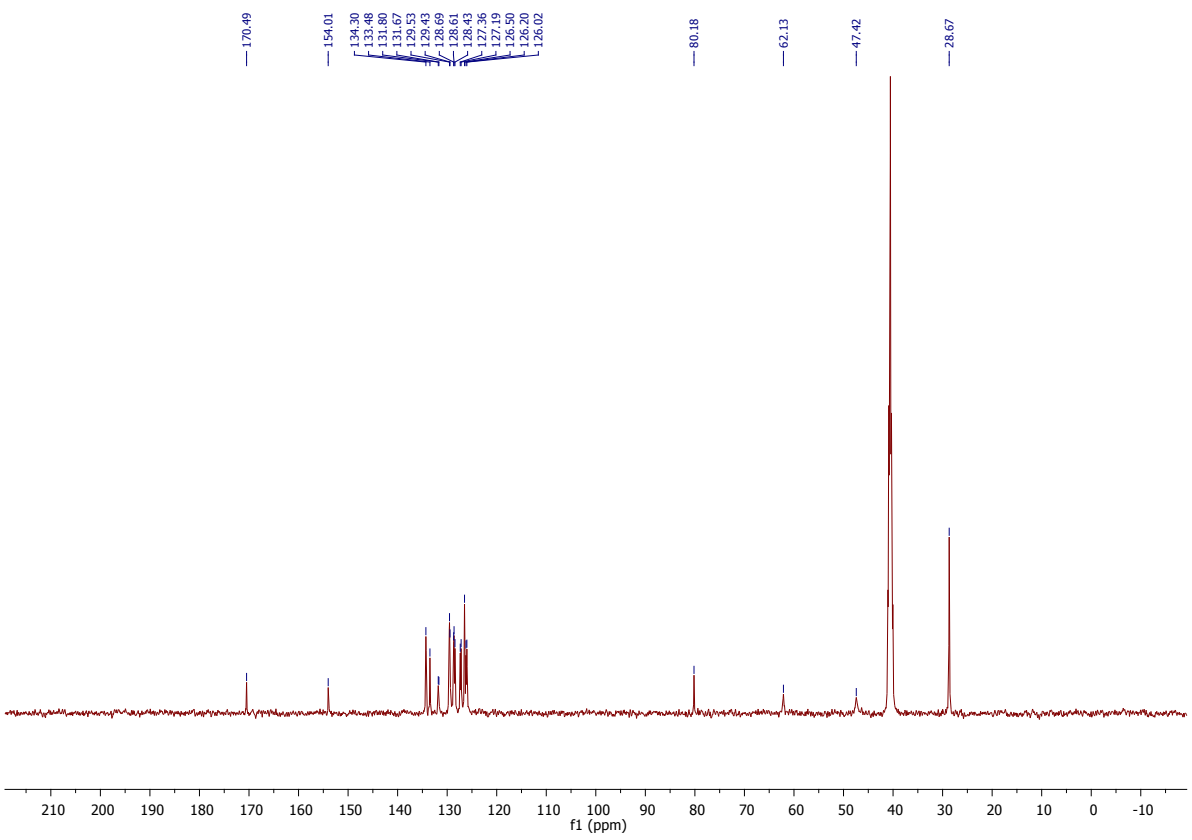



2nd eluting diastereoisomer (3S,11cS)-4-(Tert-butoxycarbonyl)-4,5-dihydro-3H-dinaphtho[2,1-c:1',2'-e]azepine-3-carboxylic acid (+)-18b

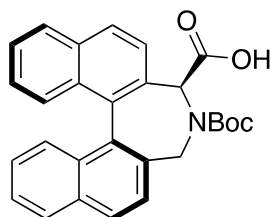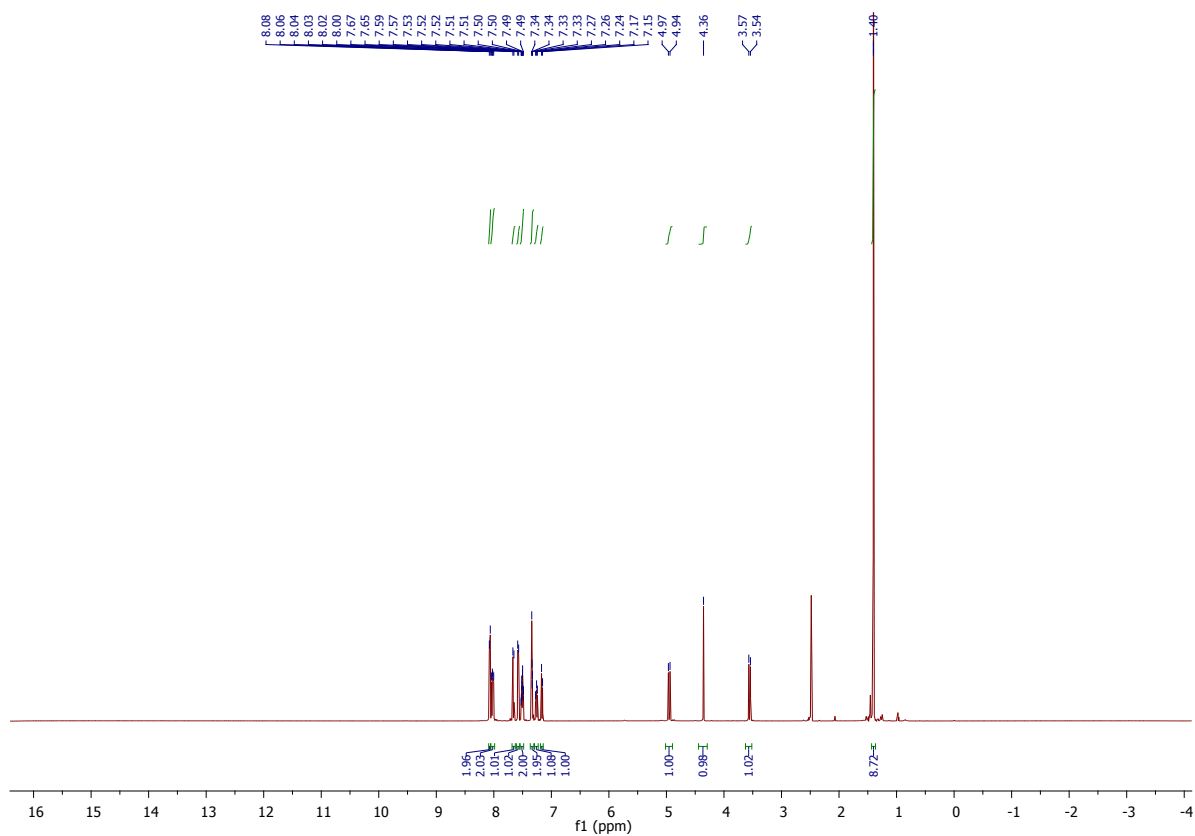

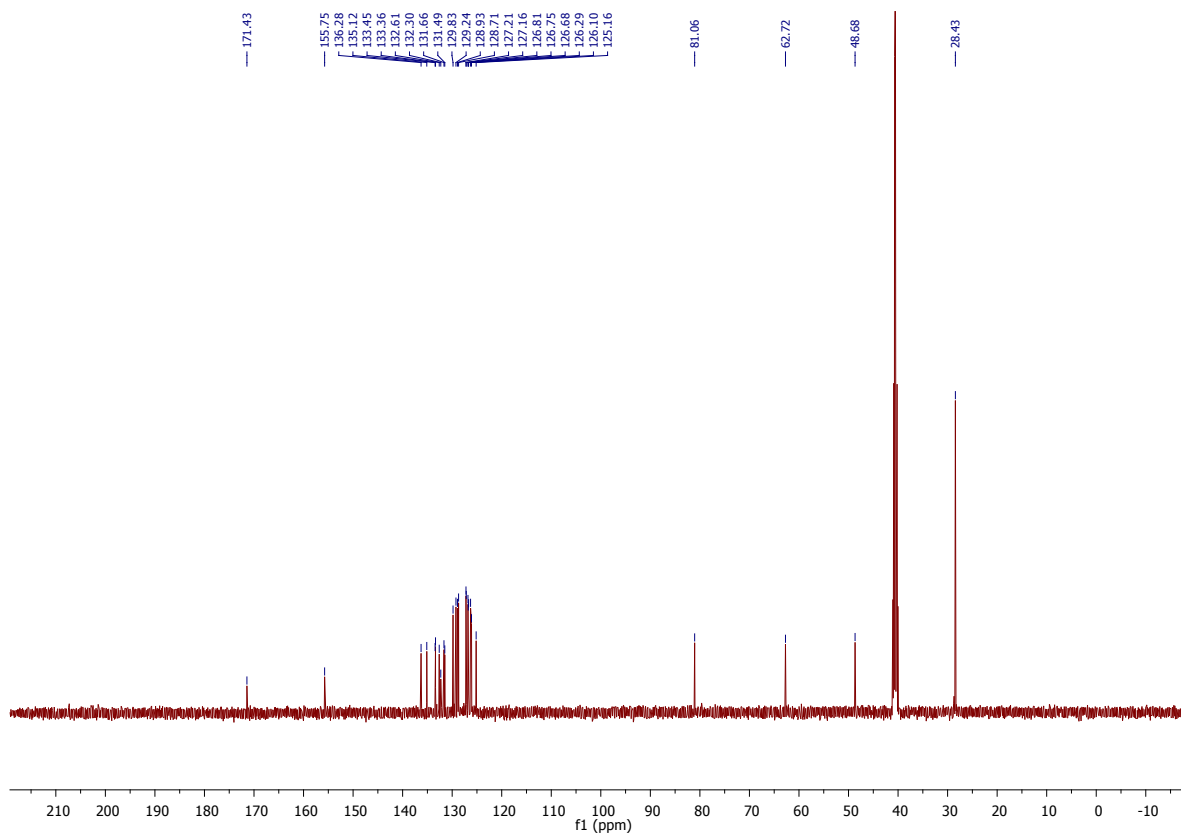

**(3R,11cS)-4,5-dihydro-3H-dinaphtho[2,1-c:1',2'-e]azepine-3-carboxylic acid hydrochloride (+)-19a.HCl**

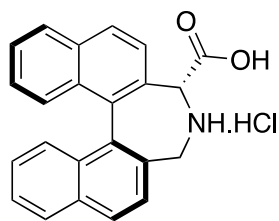

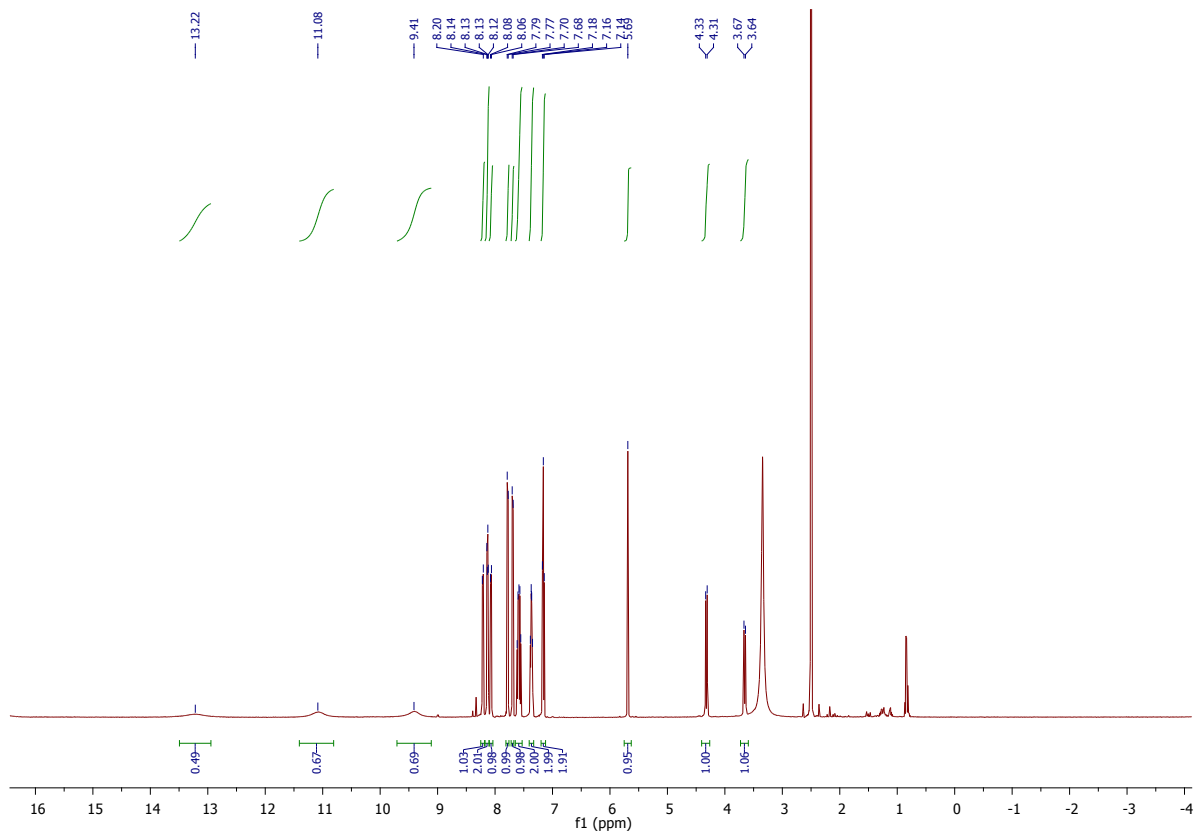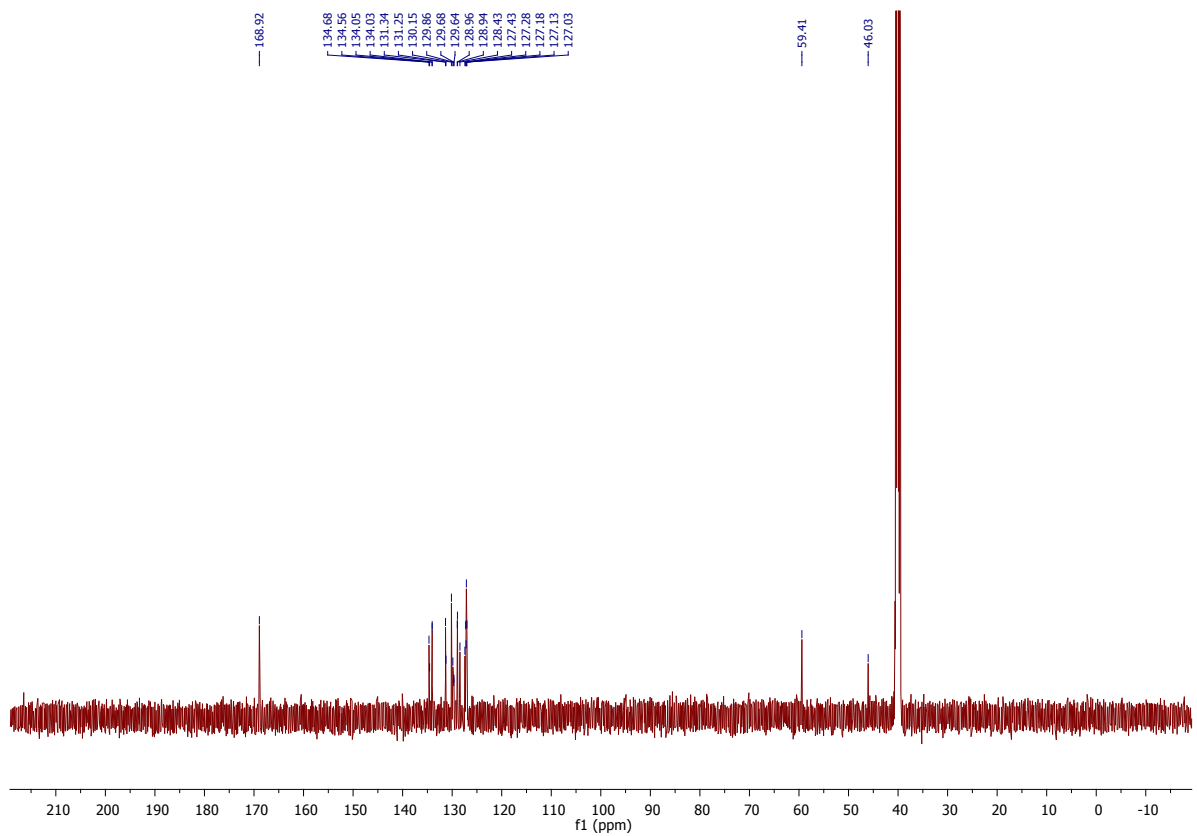

**(3R,11cS)-4,5-dihydro-3H-dinaphtho[2,1-c:1',2'-e]azepine-3-carboxylic acid (+)-19a**

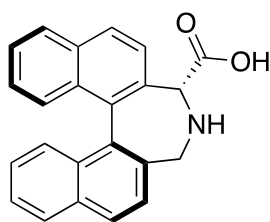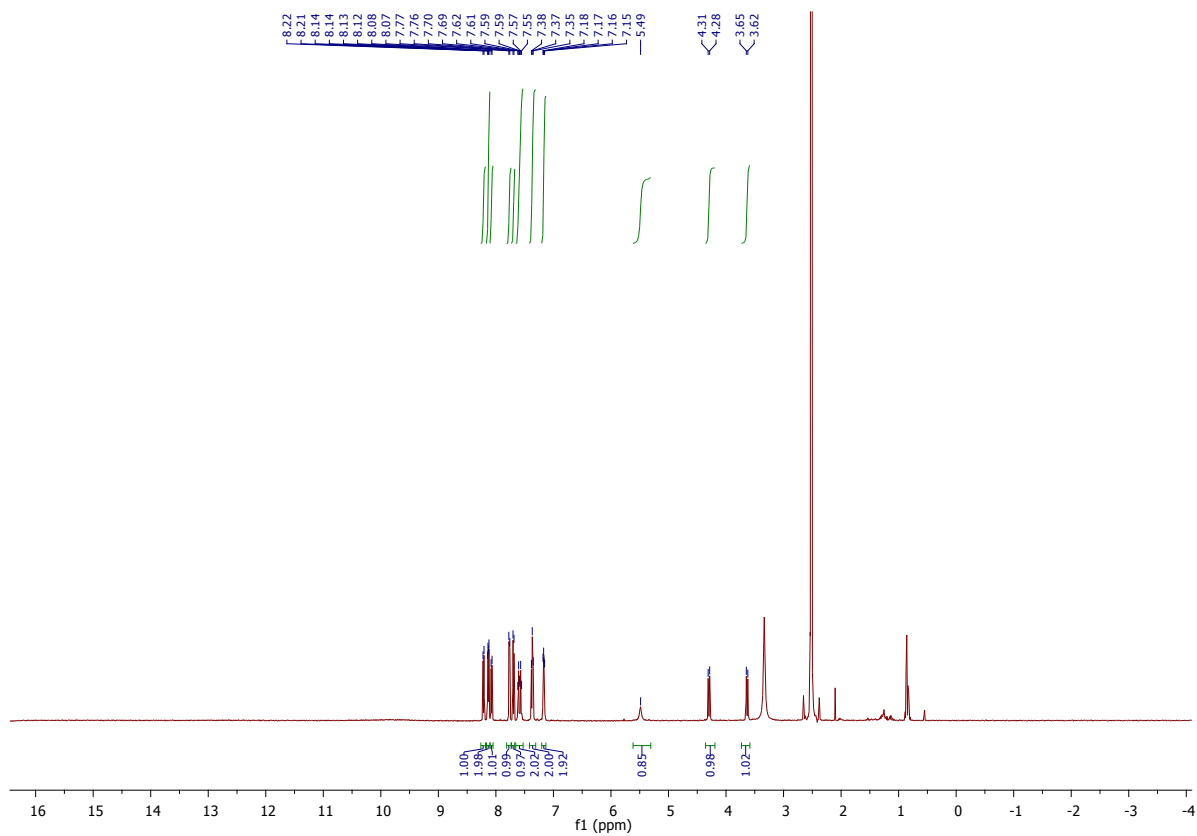

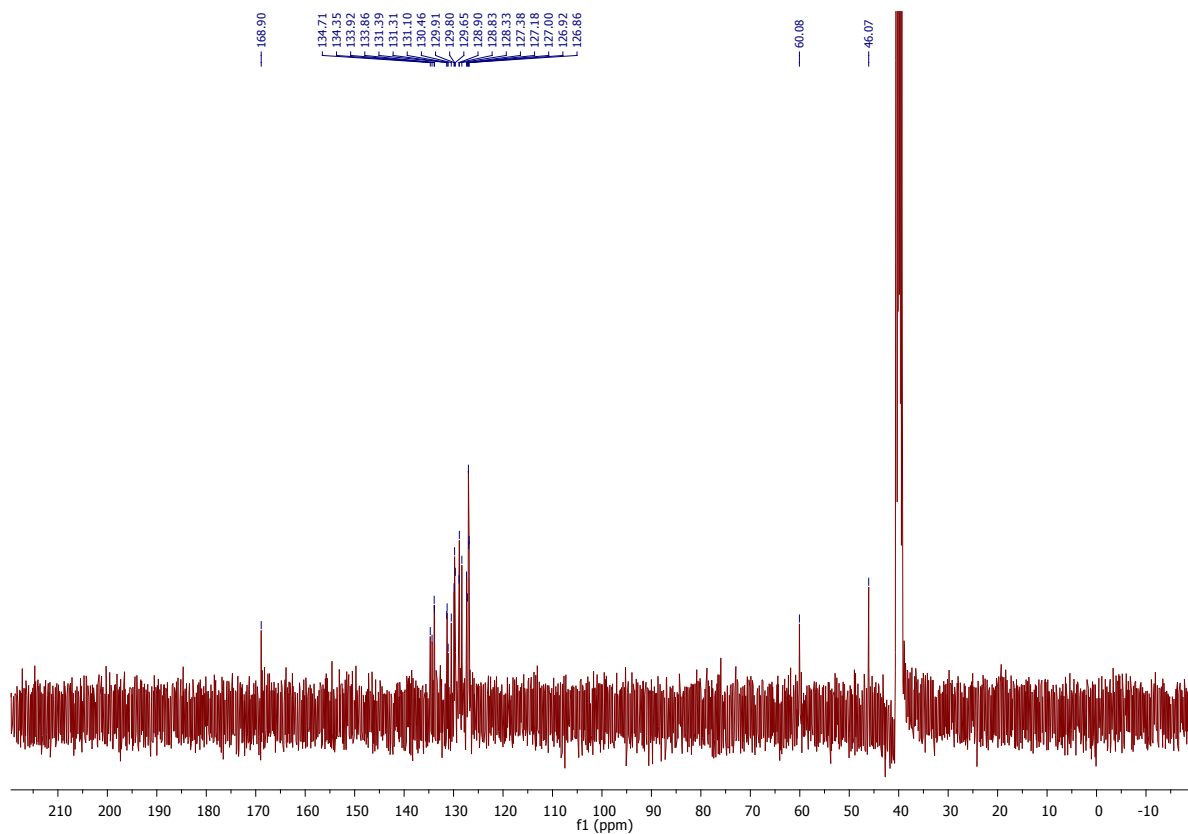

**(3S,11cS)-4,5-dihydro-3H-dinaphtho[2,1-c:1',2'-e]azepine-3-carboxylic acid hydrochloride (+)-19b.HCl**

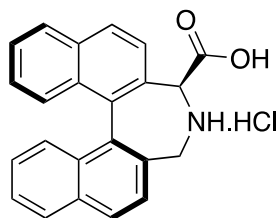

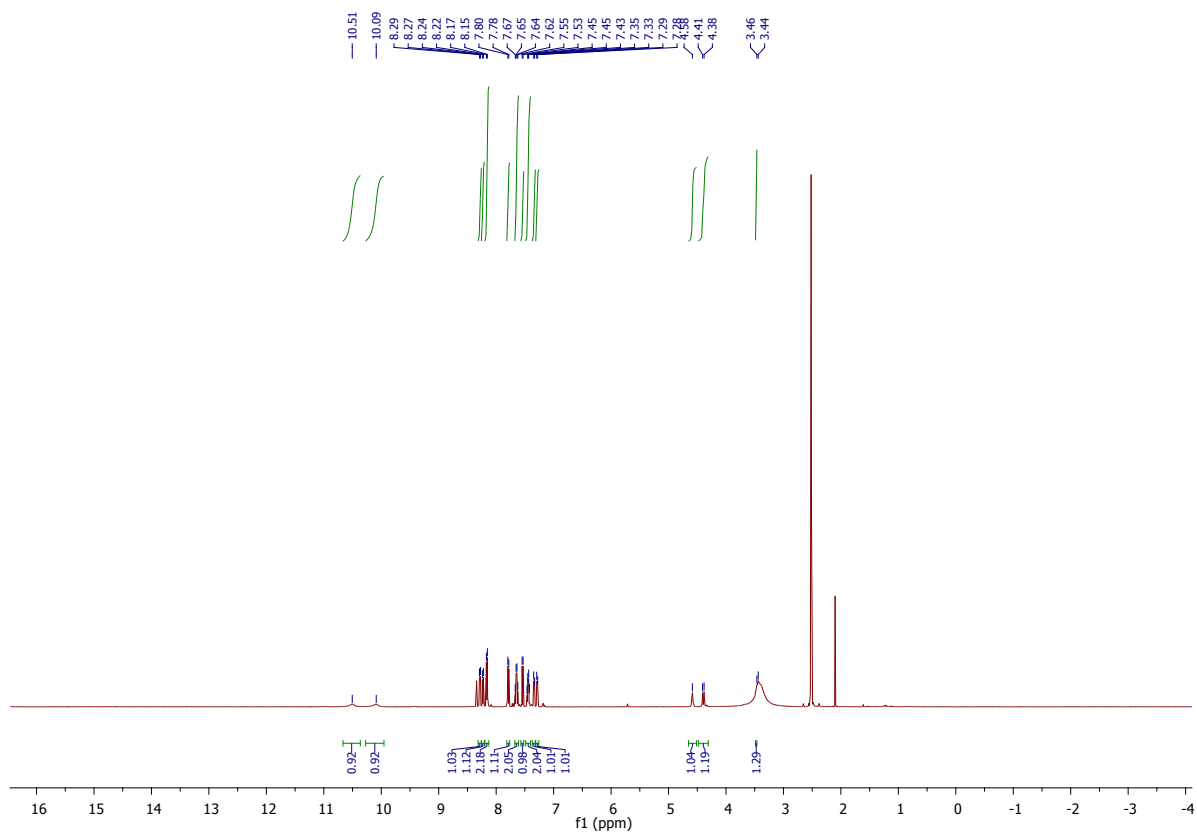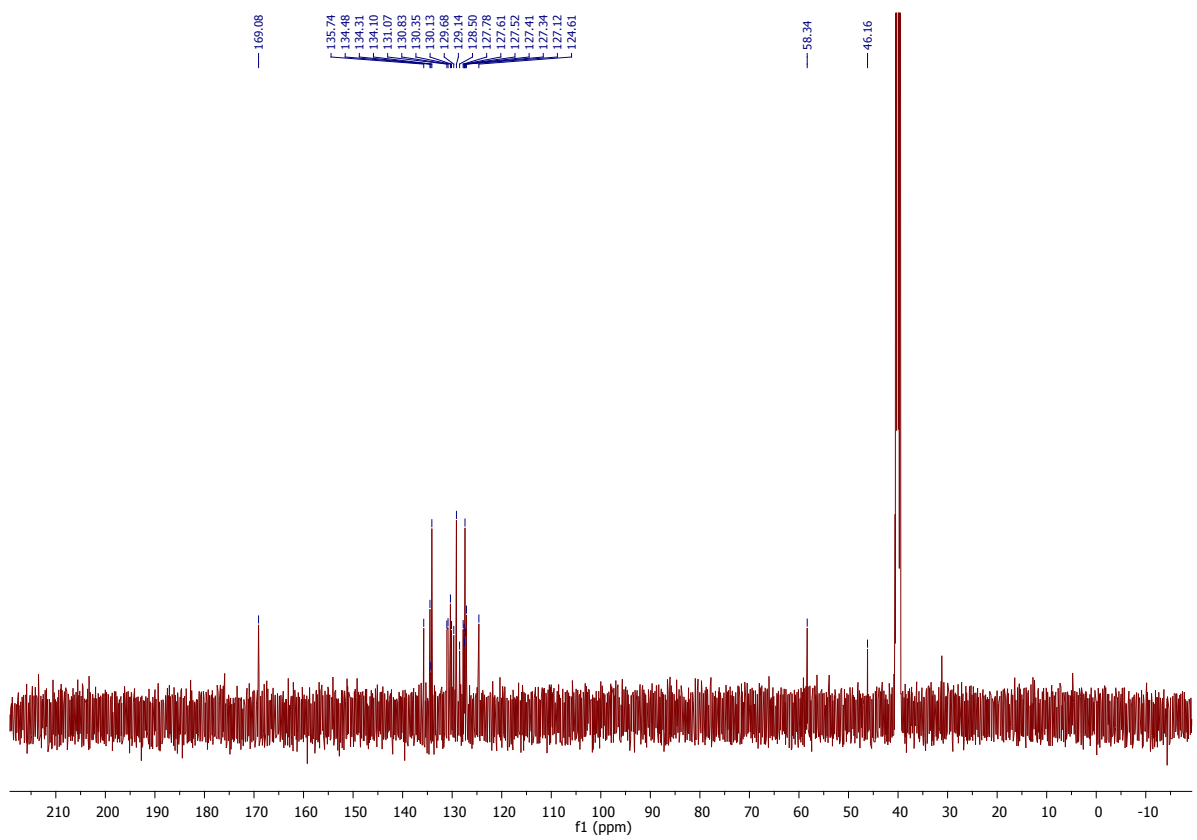

**(3S,11cS)-4,5-dihydro-3H-dinaphtho[2,1-c:1',2'-e]azepine-3-carboxylic acid (+)-19b**

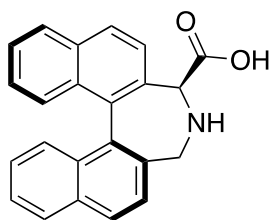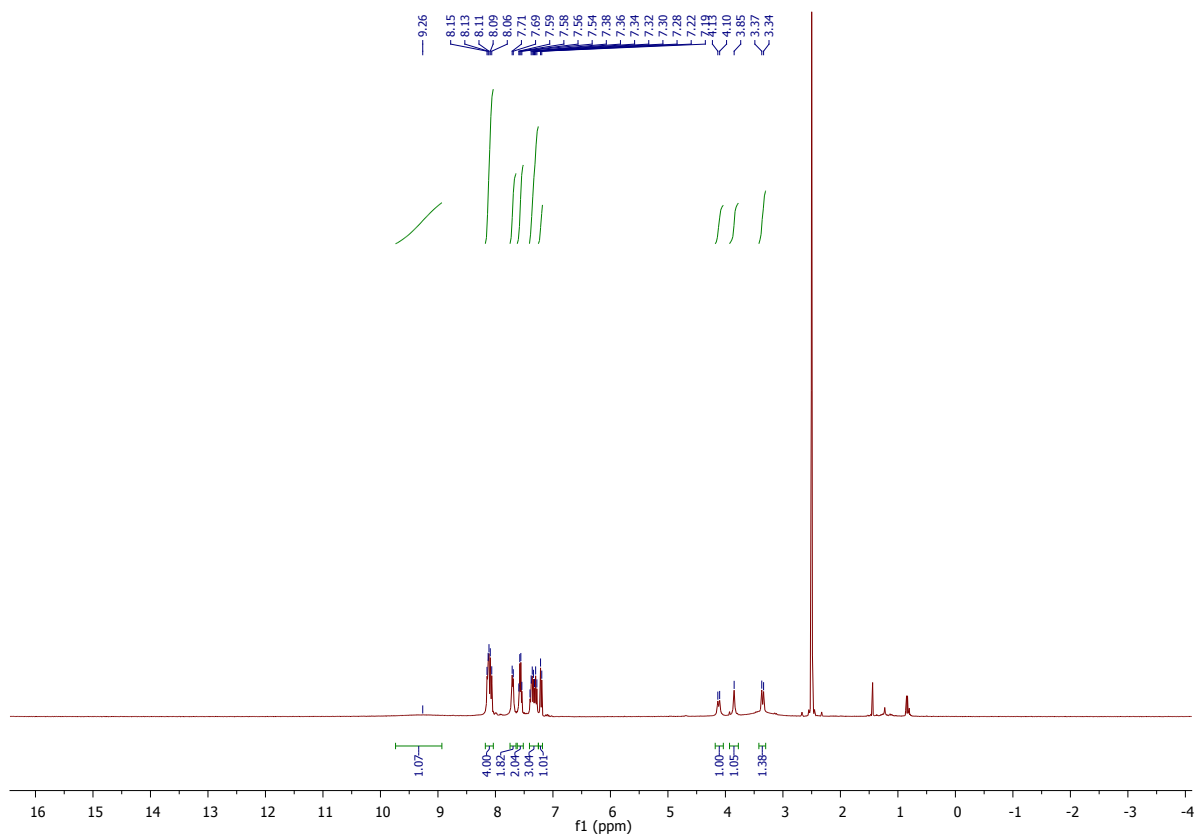

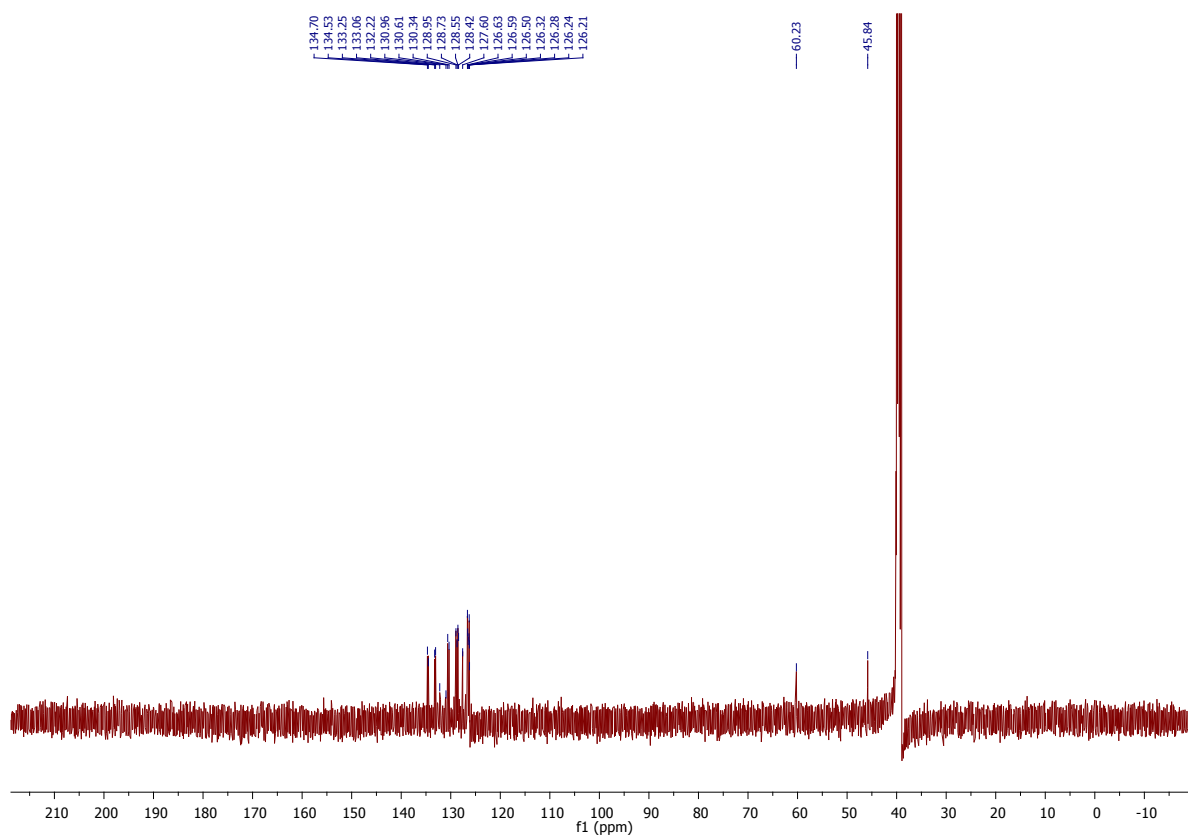

**(S)-6,6'-dimethyl-[1,1'-biphenyl]-2,2'-dicarboxylic acid 31 (+)-21**

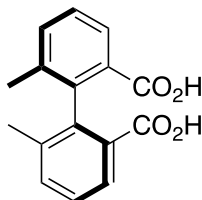



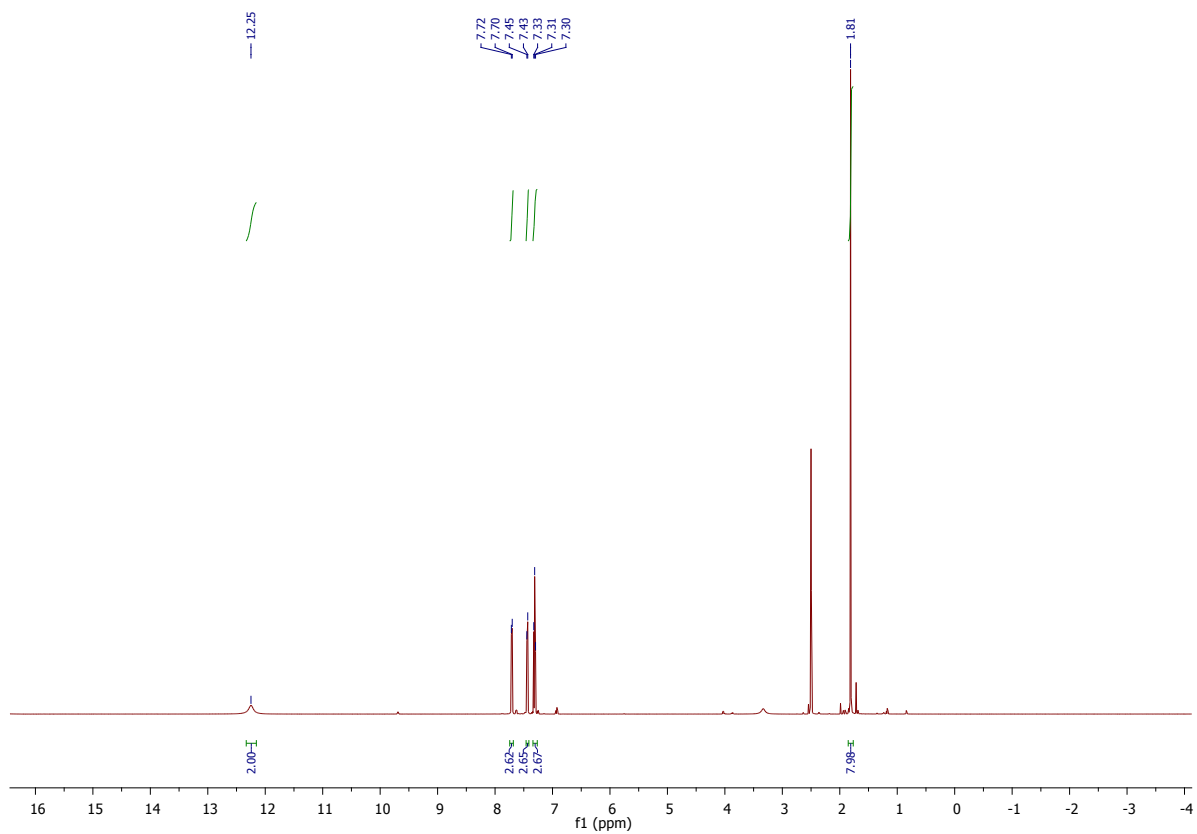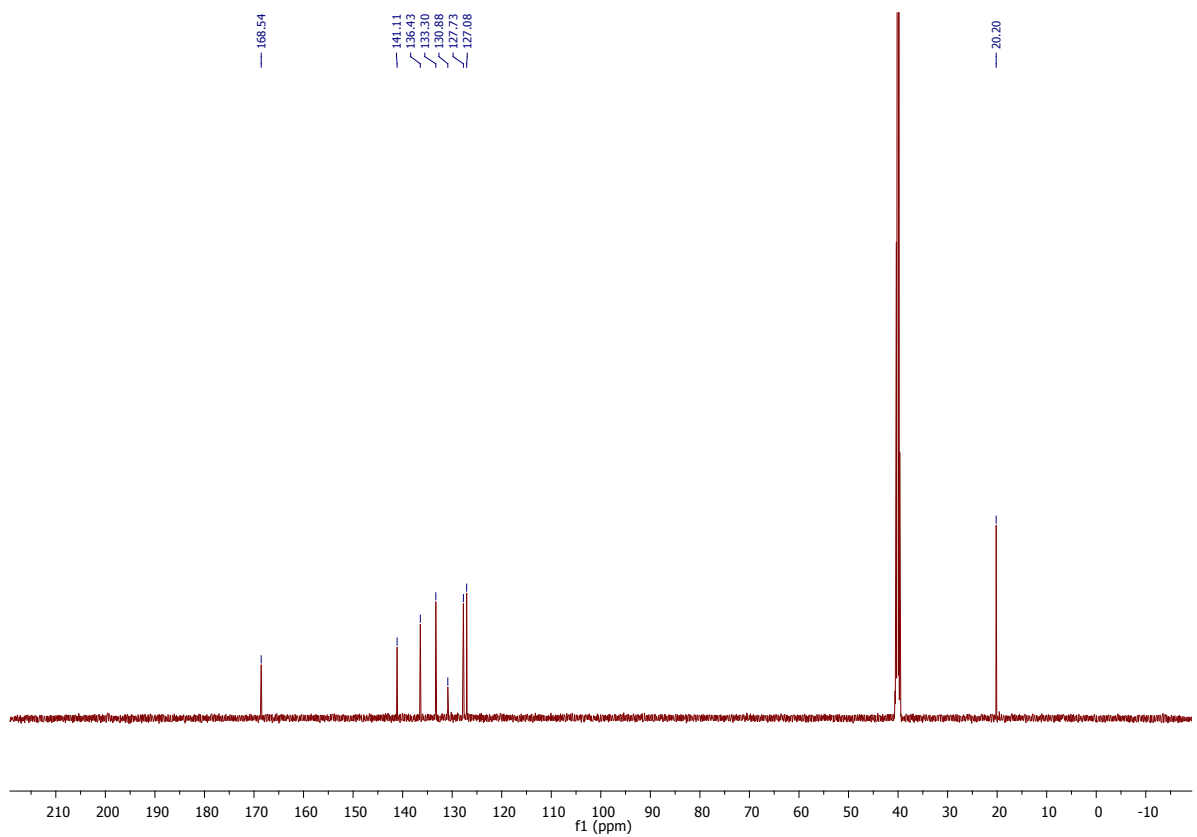

**(-)-(S)-(6,6'-dimethyl-[1,1'-biphenyl]-2,2'-diyl)dimethanol (-)-22**

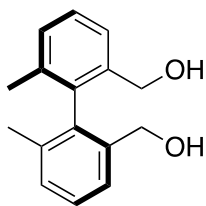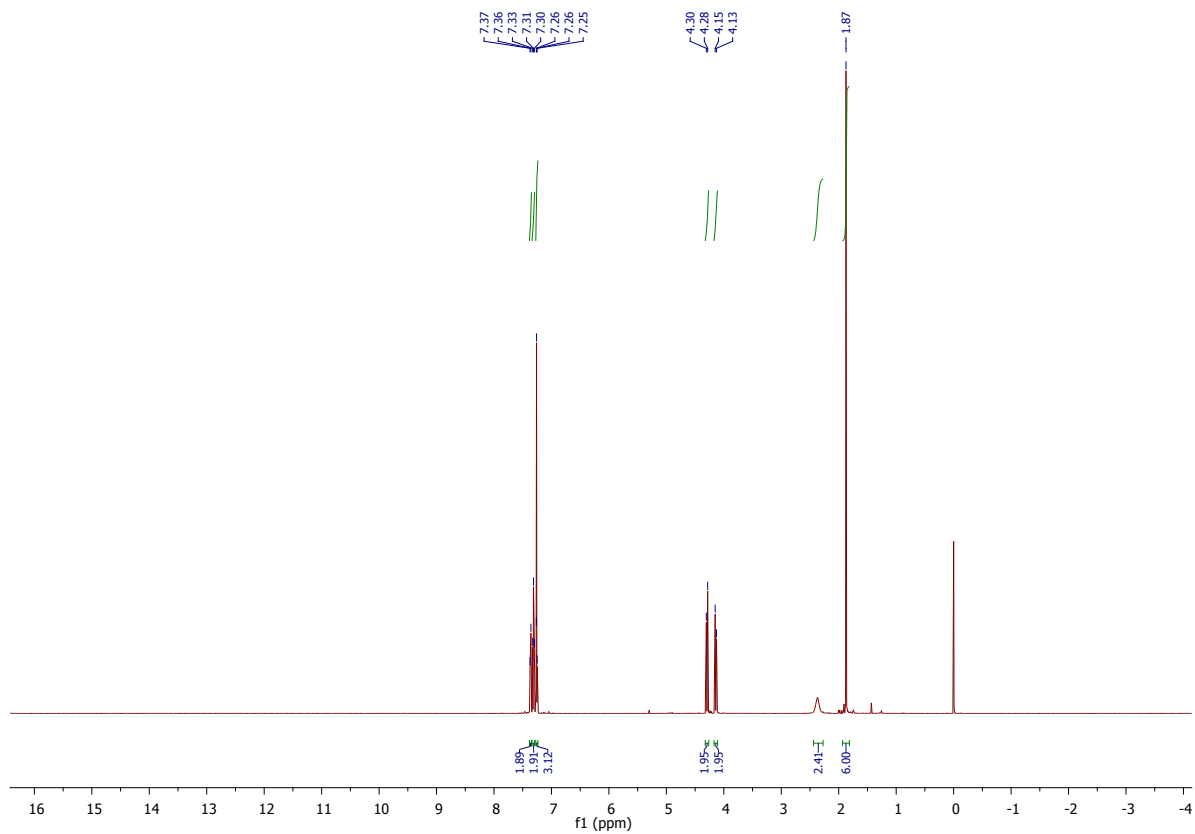

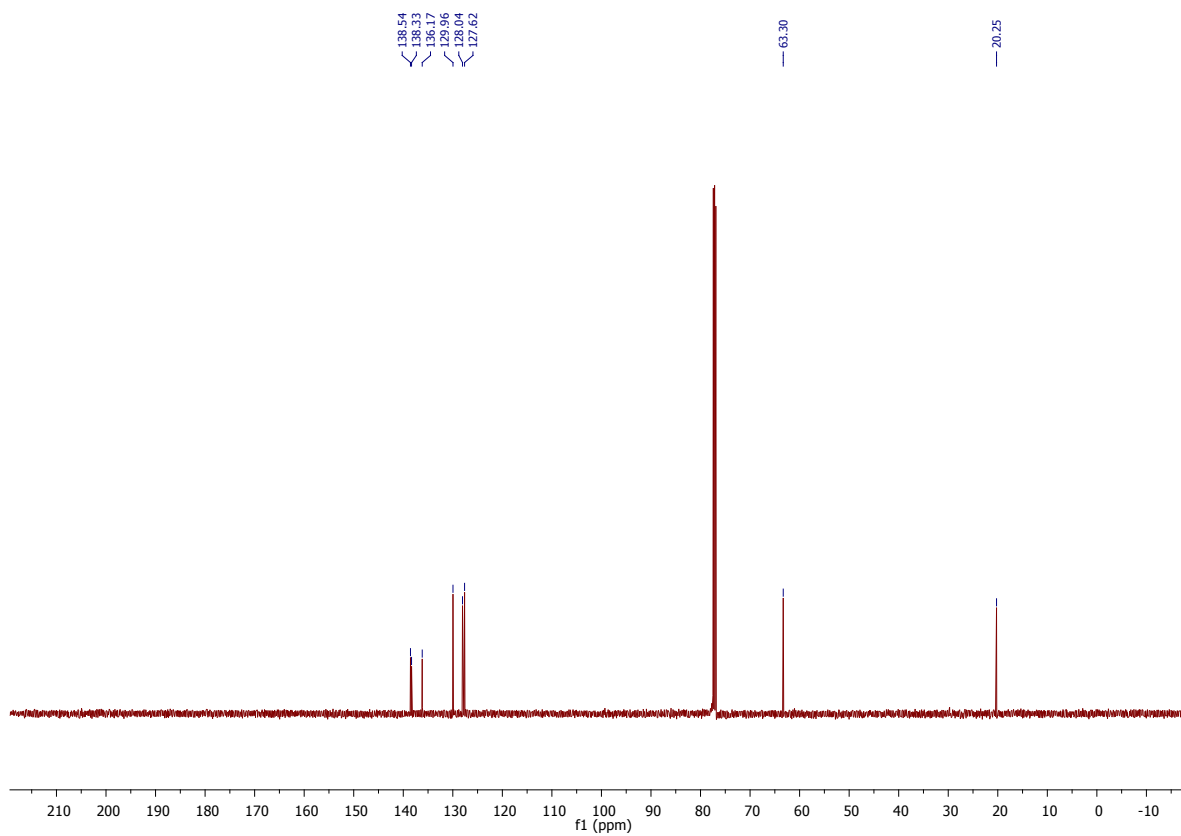

**(+)-2,2'-bis(bromomethyl)-6,6'-dimethyl-1,1'-biphenyl (+)-20**

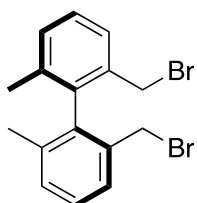

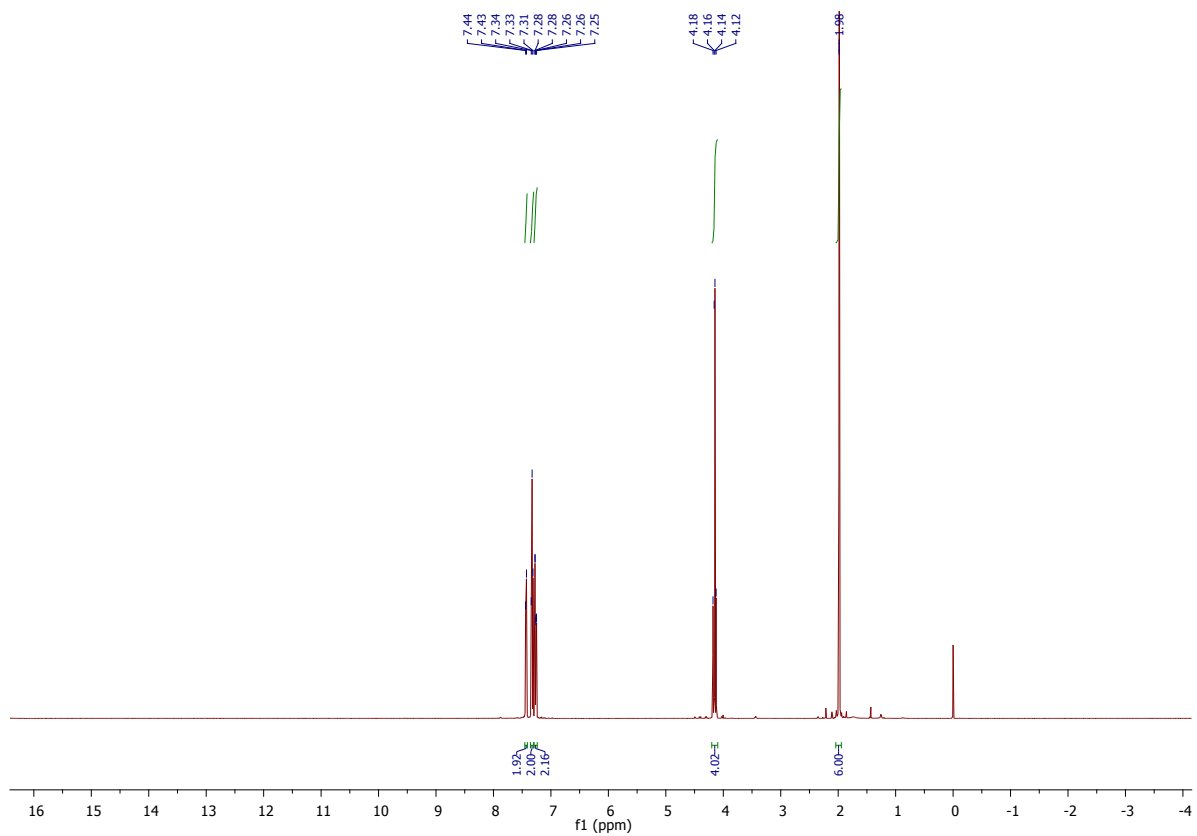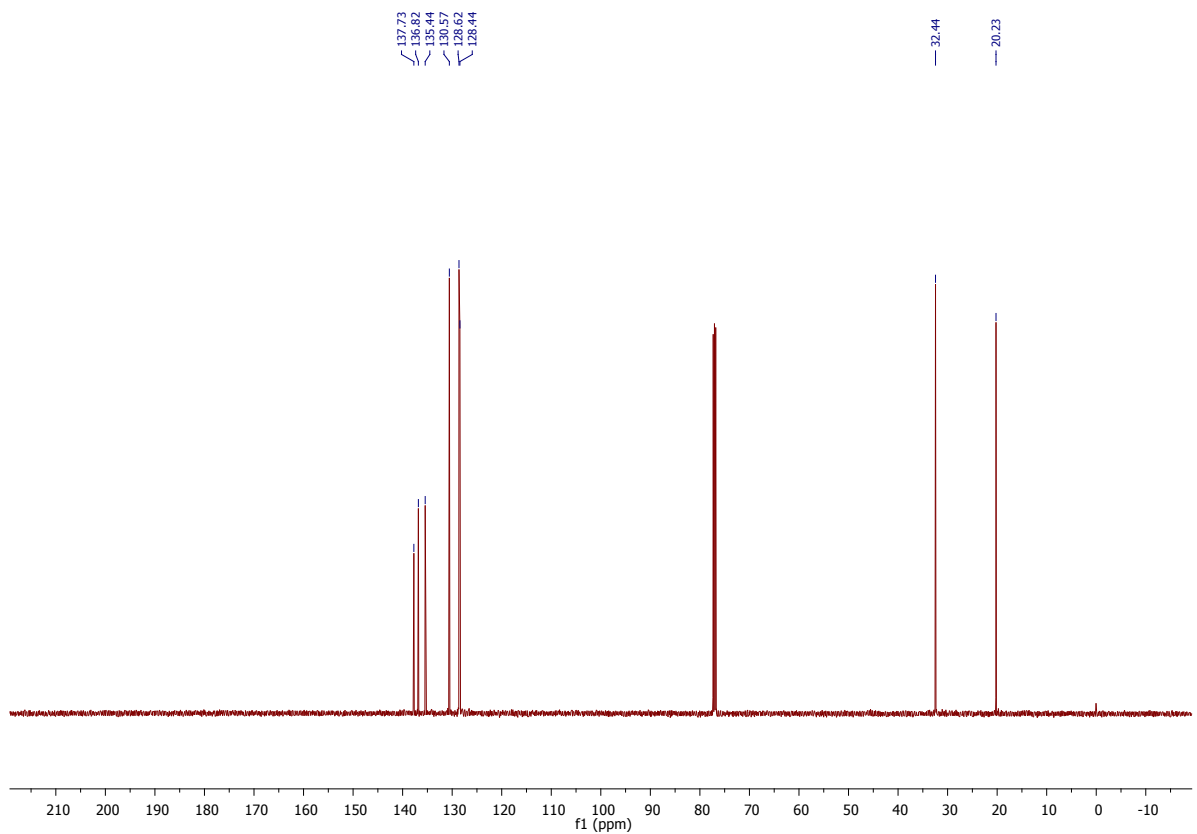

(+)-(S)-tert-butyl 1,11-dimethyl-5H-dibenzo[c,e]azepine-6(7H)-carboxylate (-)-23

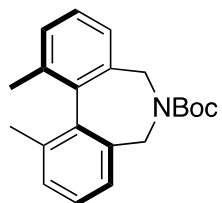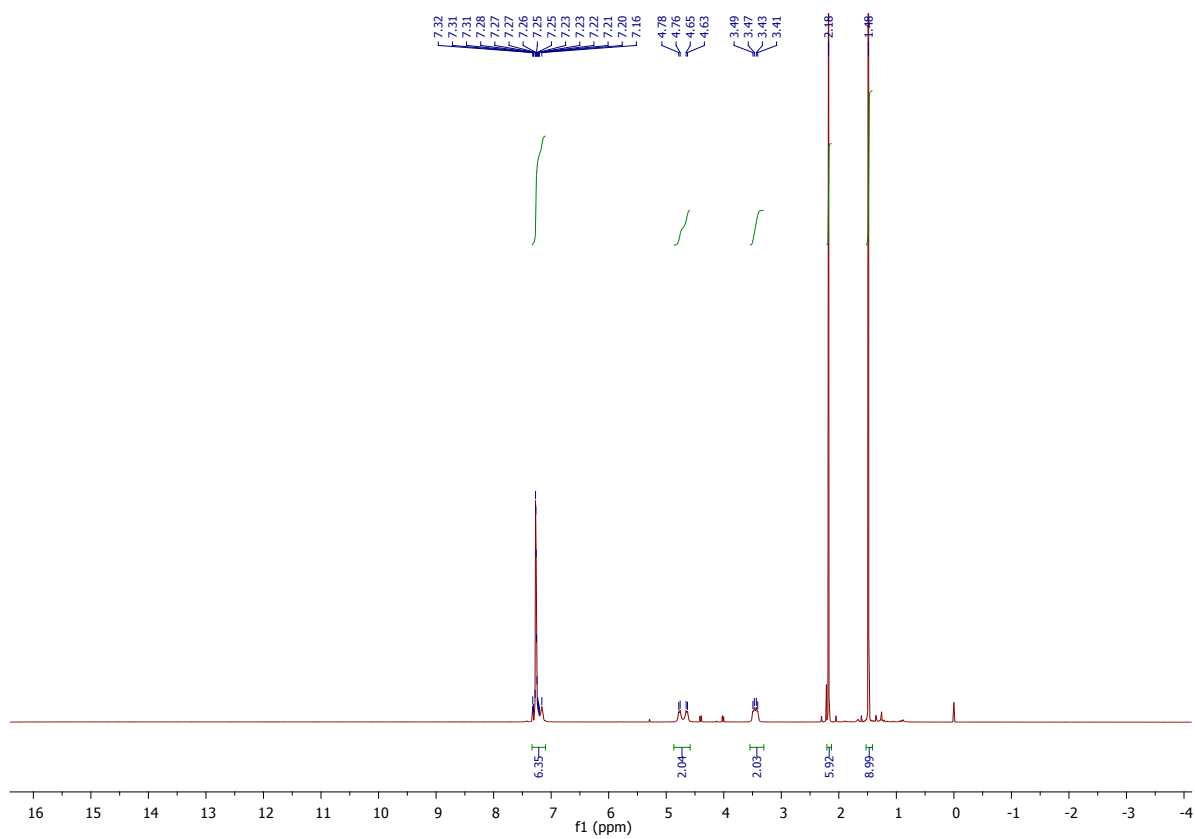

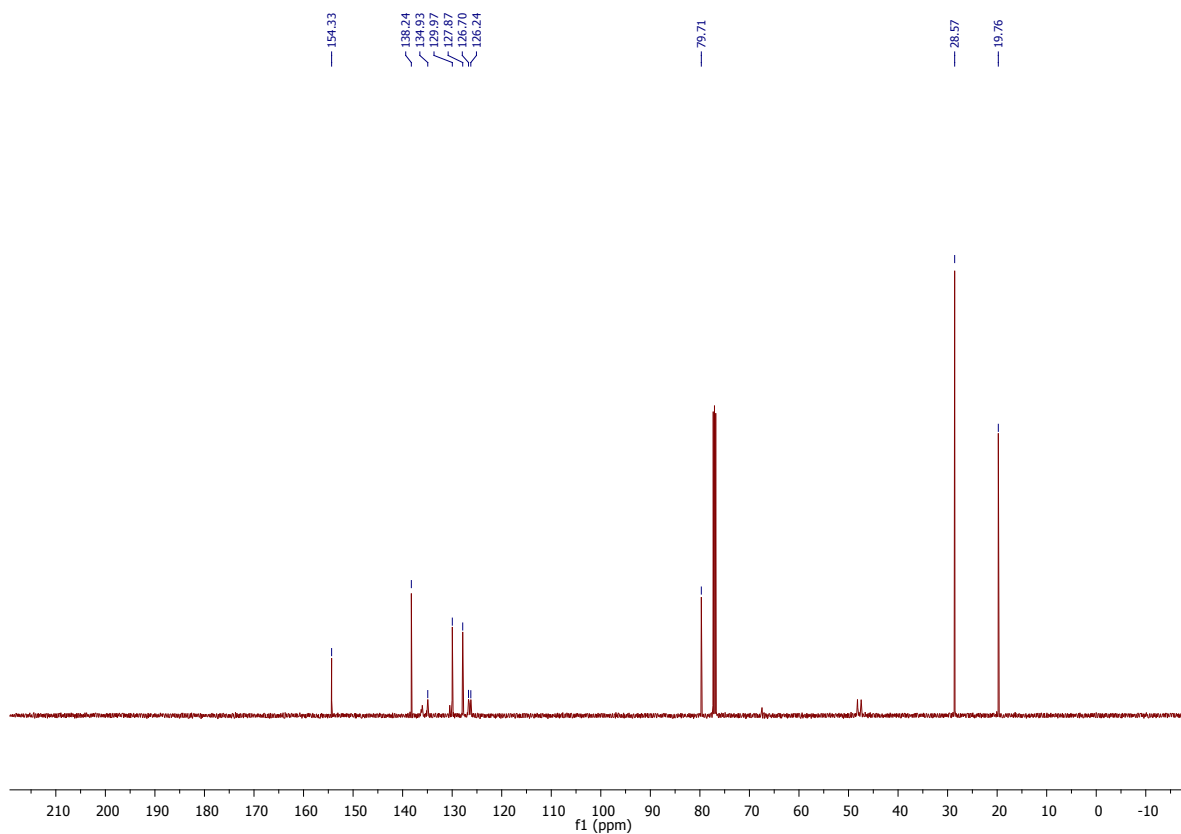

**(5R,11bS)-6-tert-butyl 5-methyl 1,11-dimethyl-5H-dibenzo[c,e]azepine-5,6(7H)-dicarboxylate (–)-24**

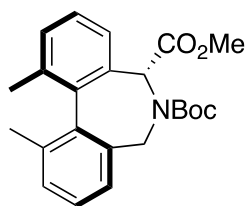

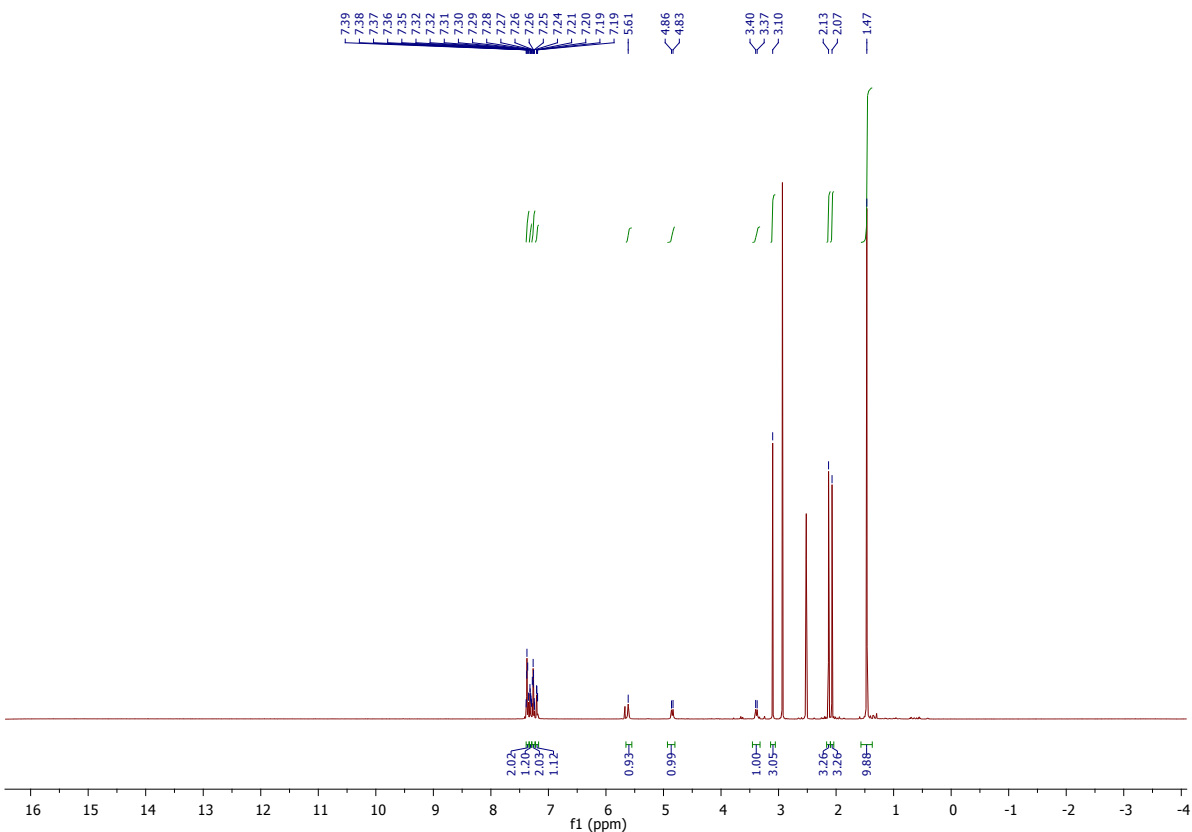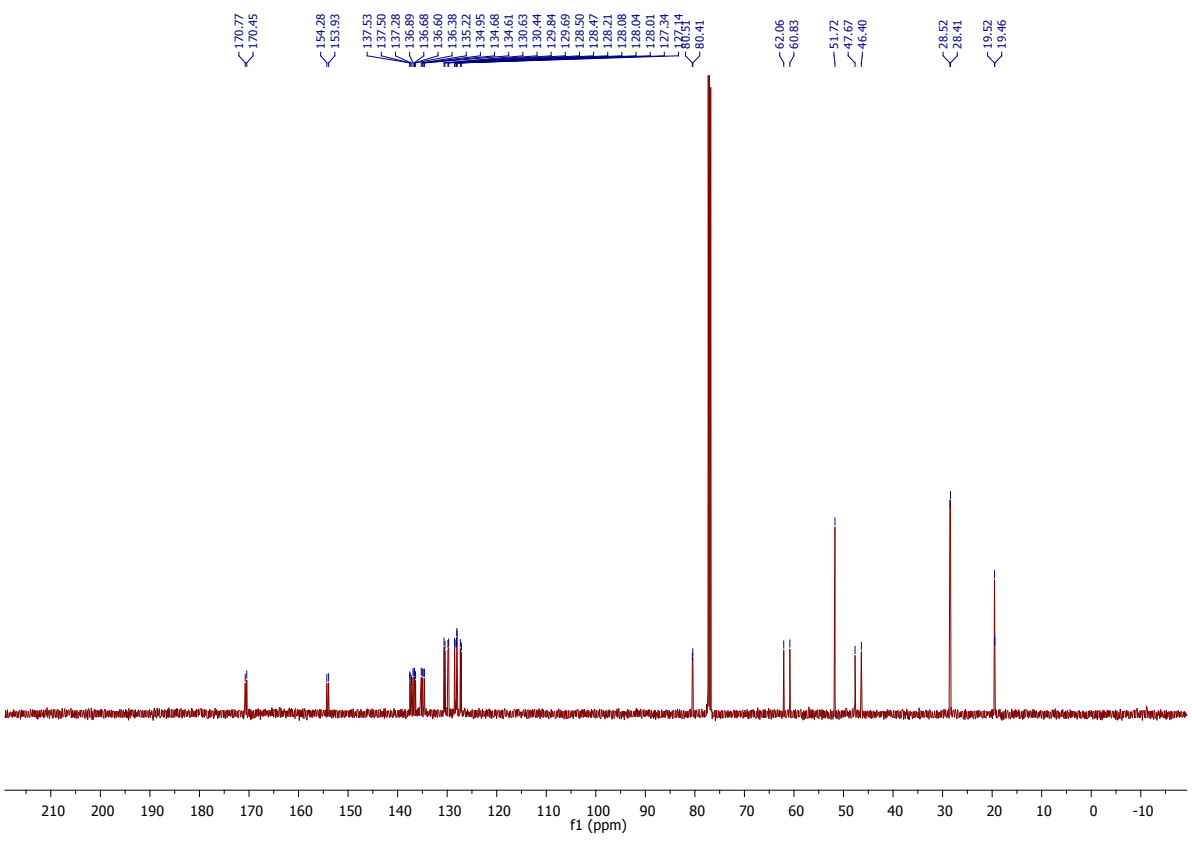

**(5R,11bS)-Methyl 1,11-dimethyl-6,7-dihydro-5H-dibenzo[c,e]azepine-5-carboxylate (+)-**  
**25**

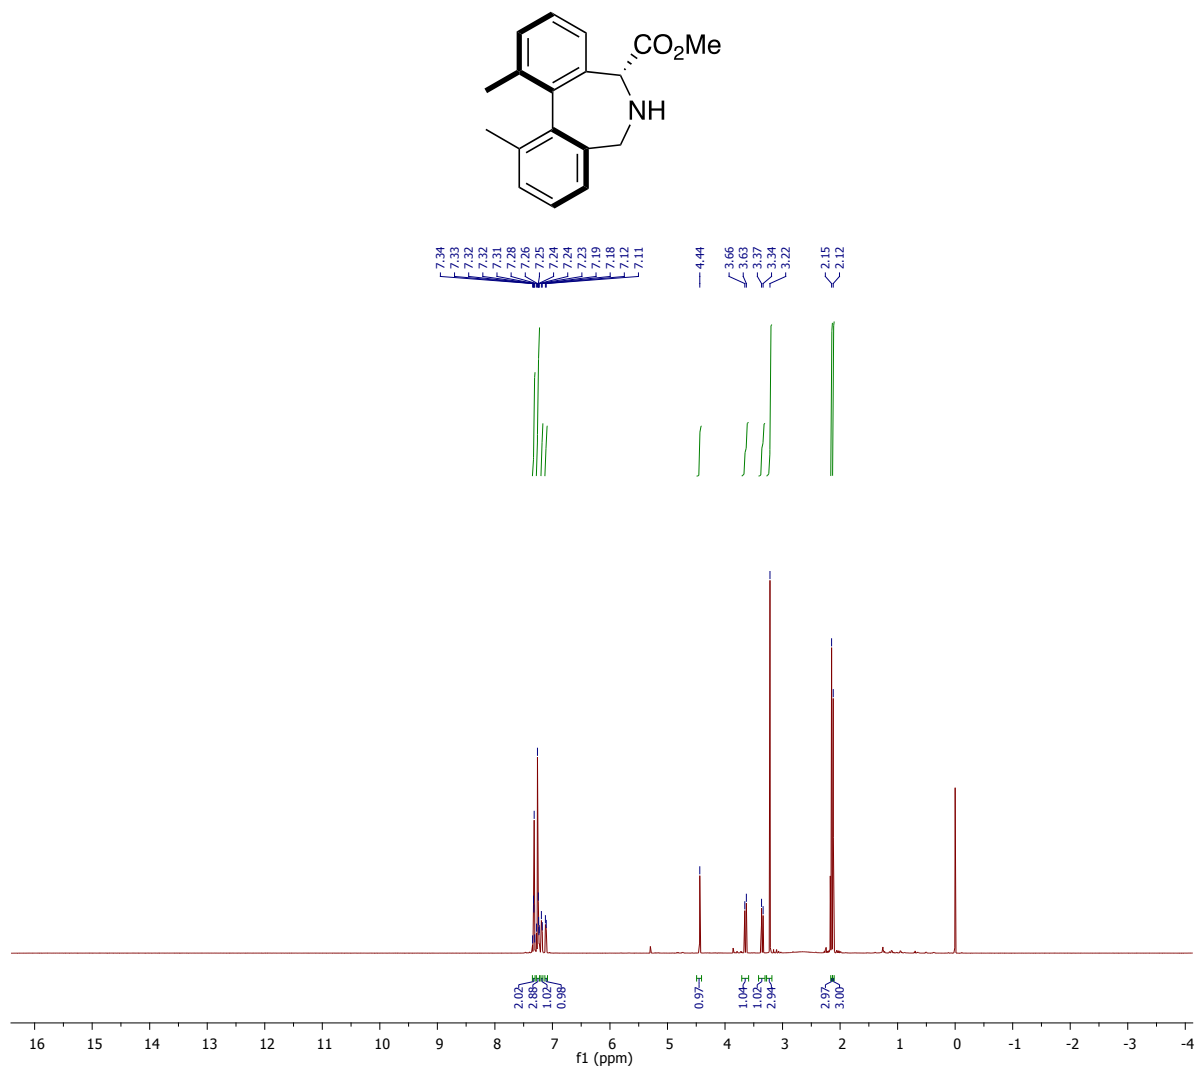



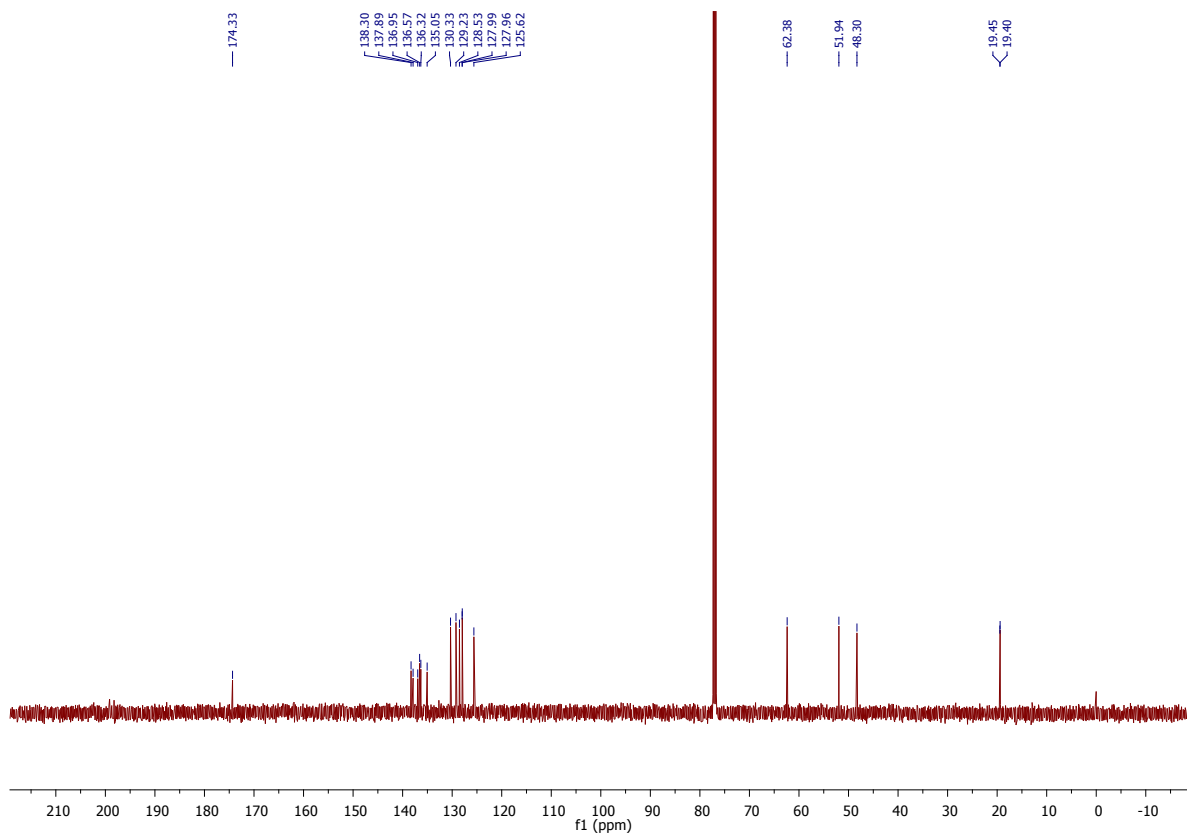

**(5R,11bS)-6-(tert-butoxycarbonyl)-1,11-dimethyl-6,7-dihydro-5Hdibenzo[c,e] azepine-5-carboxylic acid (-)-26**

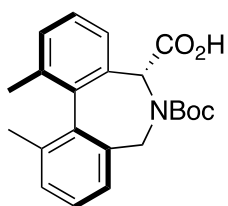

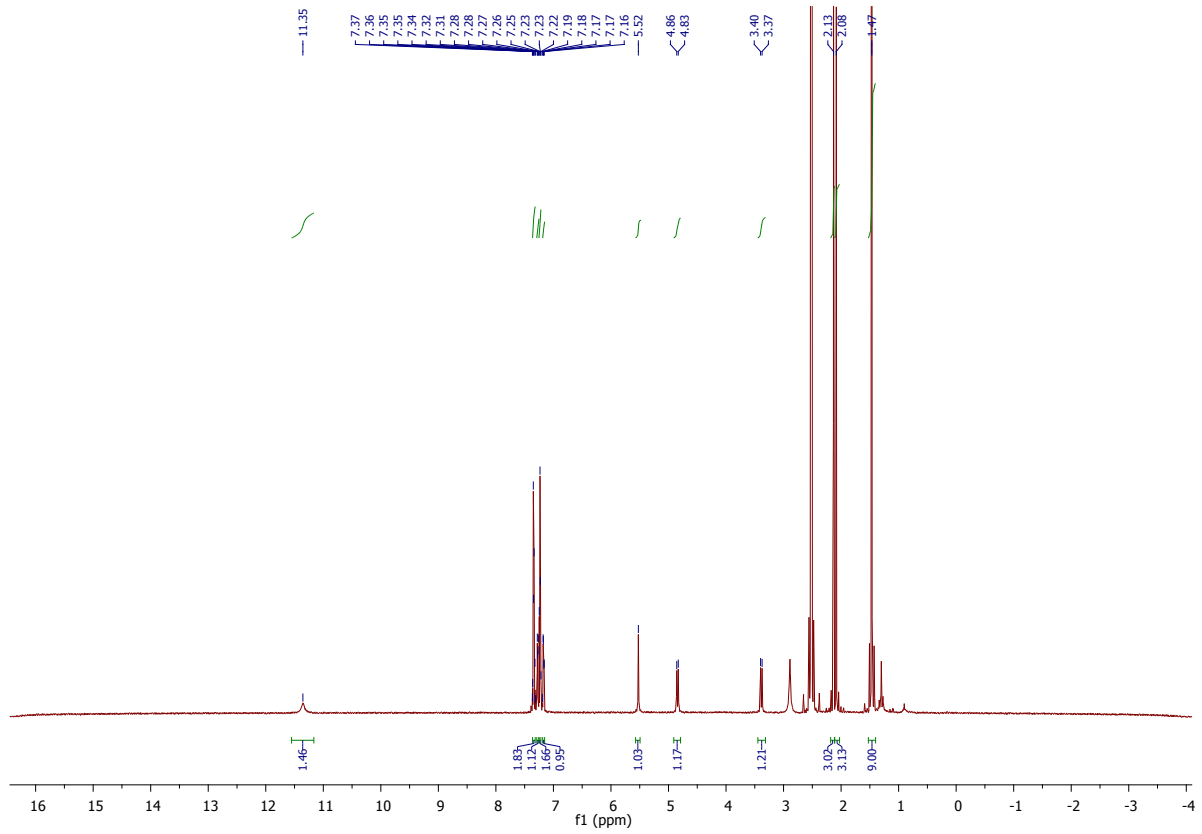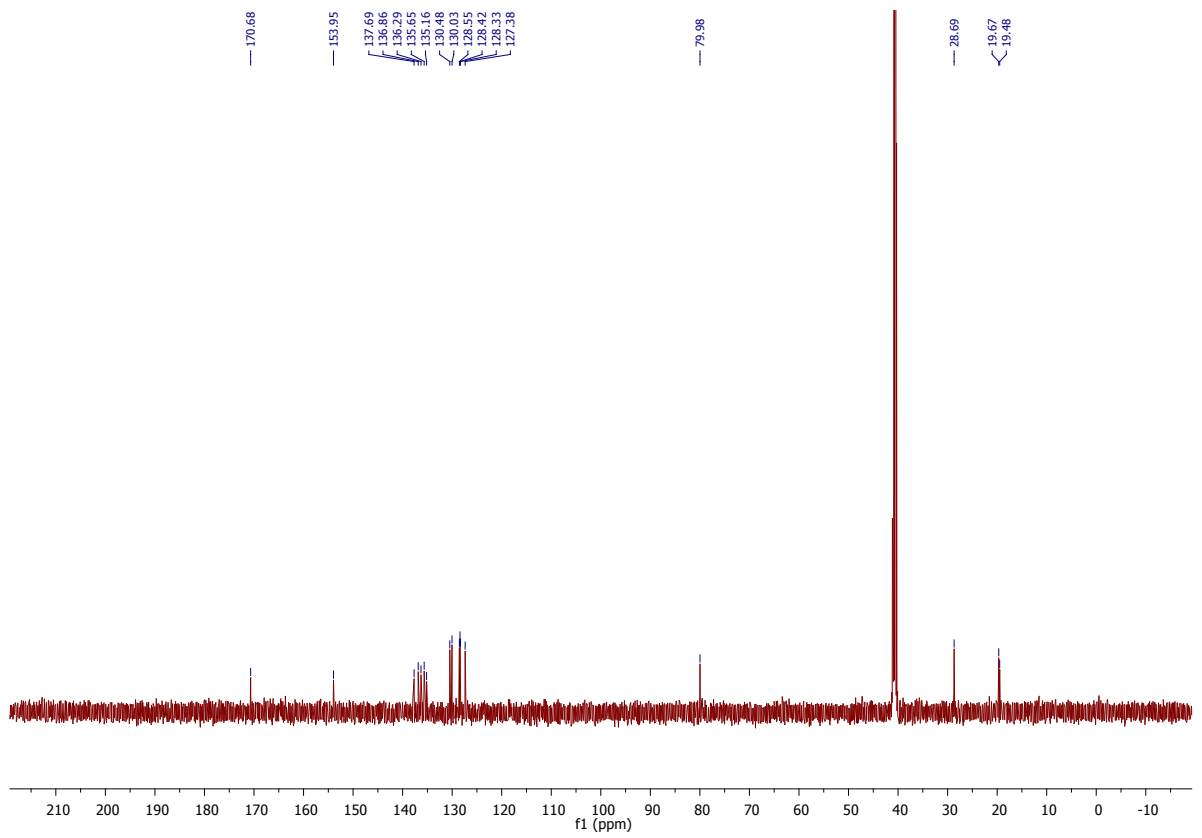

**(5R,11bS)-1,11-dimethyl-6,7-dihydro-5H-dibenzo[*c,e*]azepine-5-carboxylic acid trifluoroacetic acid (-)-27.TFA**

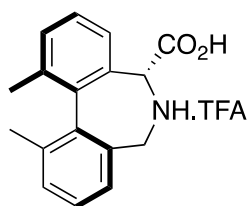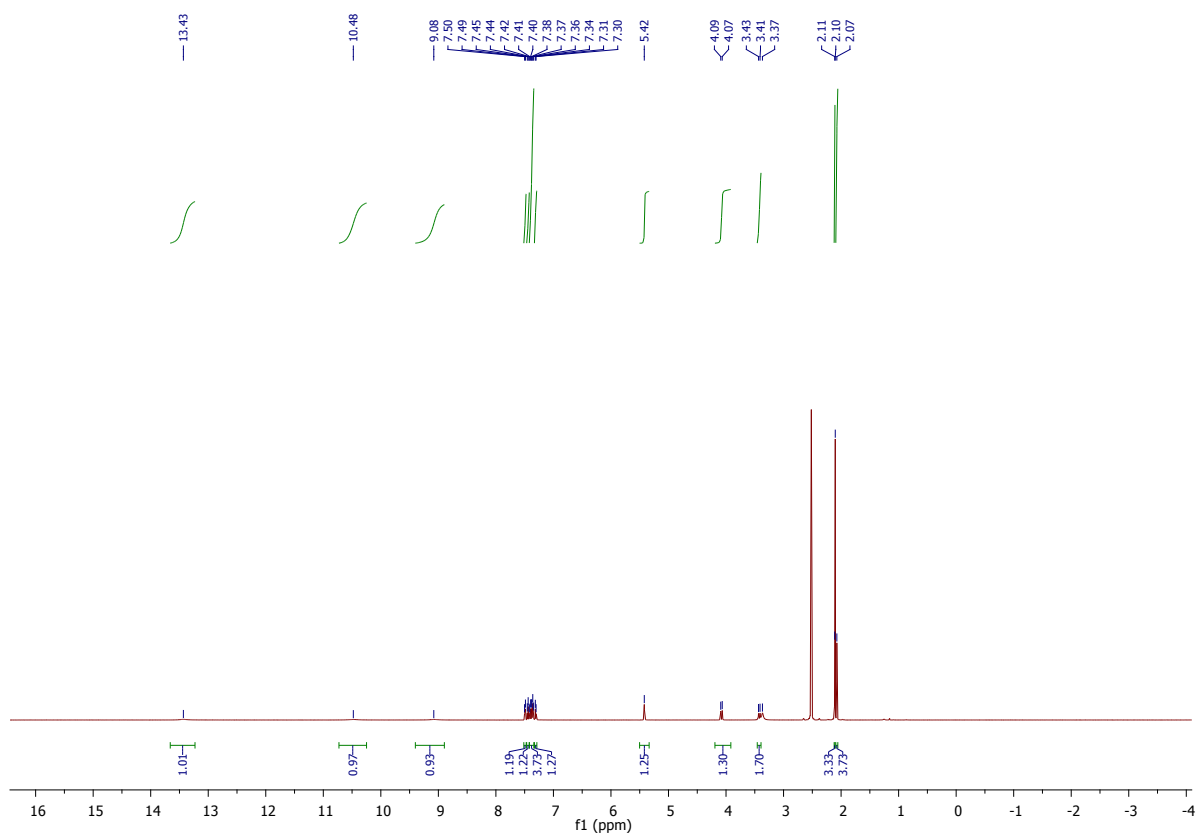

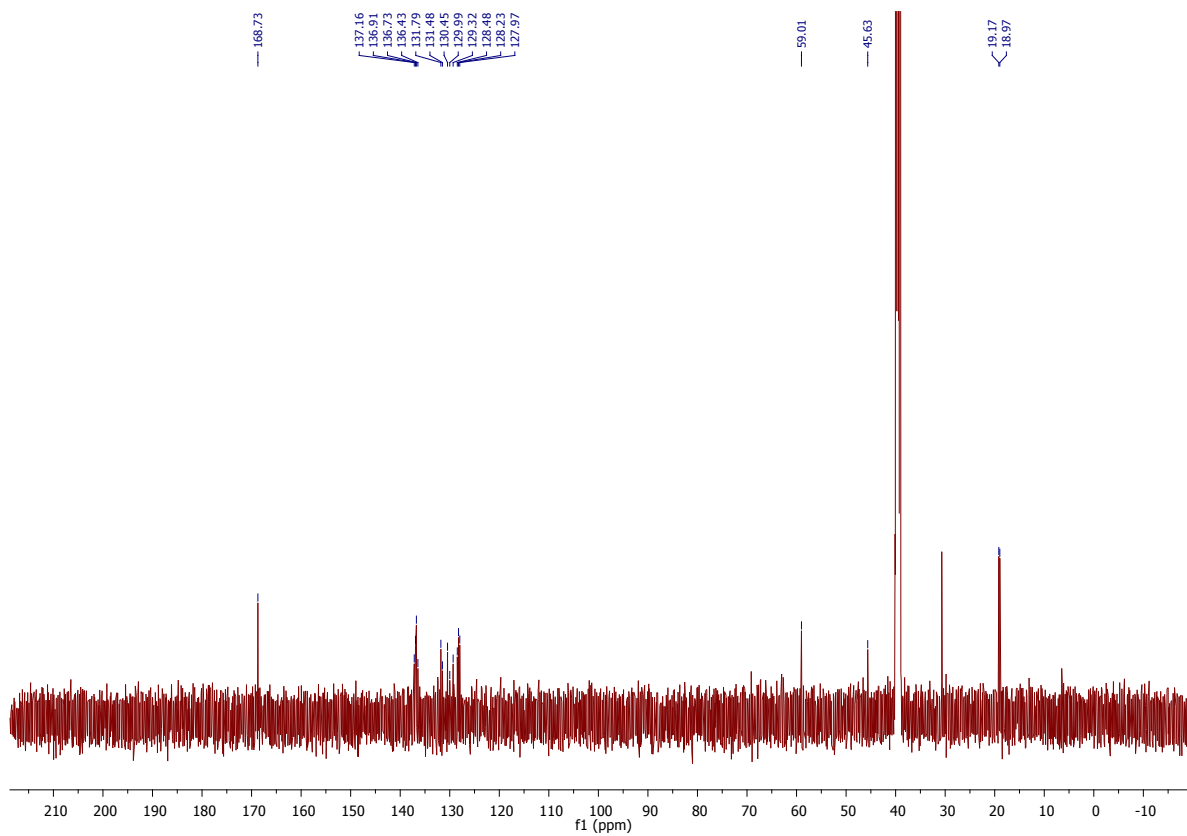

## Racemic trace

### Table 1: Entry 1

#### 3-Phenylbicyclo[2.2.1]hept-5-en-2-yl)methanol

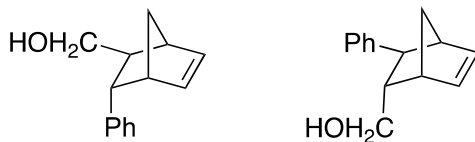

Enantiomeric excesses were determined using HPLC with Chiralcel® OJ column (hexane/iPrOH=90:10,  $\lambda=222$  nm), 1.0 mL; *endo* isomer ( $t_R$  15 min, 35 min) *exo* isomer ( $t_R$  47 min, 65 min))

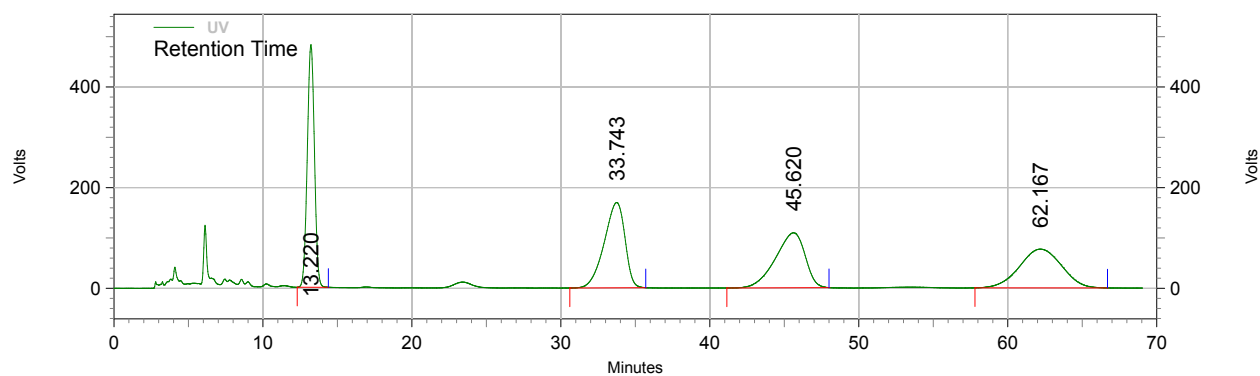

### UV Results

| Retention Time | Area     | Area % | Height  | Height % |
|----------------|----------|--------|---------|----------|
| 13.220         | 64536756 | 25.71  | 1928102 | 57.55    |
| 33.743         | 65498431 | 26.09  | 677564  | 20.22    |
| 45.620         | 60424958 | 24.07  | 436586  | 13.03    |
| 62.167         | 60578598 | 24.13  | 308081  | 9.20     |

|        |           |        |         |        |
|--------|-----------|--------|---------|--------|
| Totals | 251038743 | 100.00 | 3350333 | 100.00 |
|--------|-----------|--------|---------|--------|

**Table 1: Entry 2**

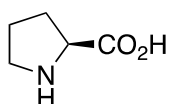

Data File: C:\EZChrom Elite\Enterprise\Projects\Fran\diels alder\fk81a 80.20 70 min ojnew col 222nm new OJ.dat

Method: C:\EZChrom Elite\Enterprise\Projects\Fran\diels alder\80.20 1ml 222nm 60 min.met

Acquired: 12/08/2015 12:06:25

Printed: 12/08/2015 16:07:04

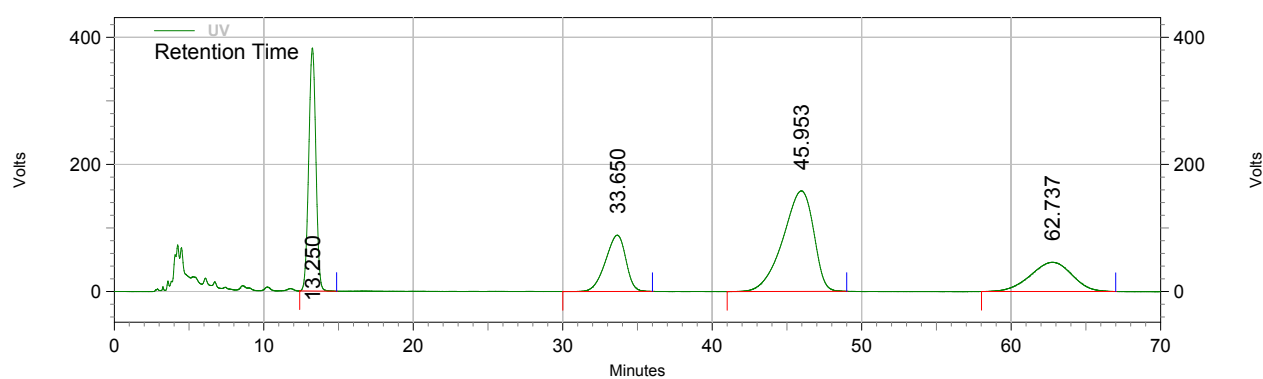

**UV Results**

| Retention Time | Area     | Area % | Height  | Height % |
|----------------|----------|--------|---------|----------|
| 13.250         | 51007629 | 24.22  | 1529611 | 56.64    |
| 33.650         | 33510346 | 15.91  | 354250  | 13.12    |
| 45.953         | 90381098 | 42.92  | 632596  | 23.43    |
| 62.737         | 35702246 | 16.95  | 183908  | 6.81     |

|        |           |        |         |        |
|--------|-----------|--------|---------|--------|
| Totals | 210601319 | 100.00 | 2700365 | 100.00 |
|--------|-----------|--------|---------|--------|

**Table 1: Entry 3**

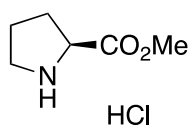

Data File: C:\EZChrom Elite\Enterprise\Projects\Fran\diels alder\fk146A 80.20 70 min OJ 222nm 1 ml.dat

Method: C:\EZChrom Elite\Enterprise\Projects\Fran\diels alder\80.20 1ml 222nm 70 min.met

Acquired: 27/08/2015 12:31:30

Printed: 27/08/2015 13:42:30

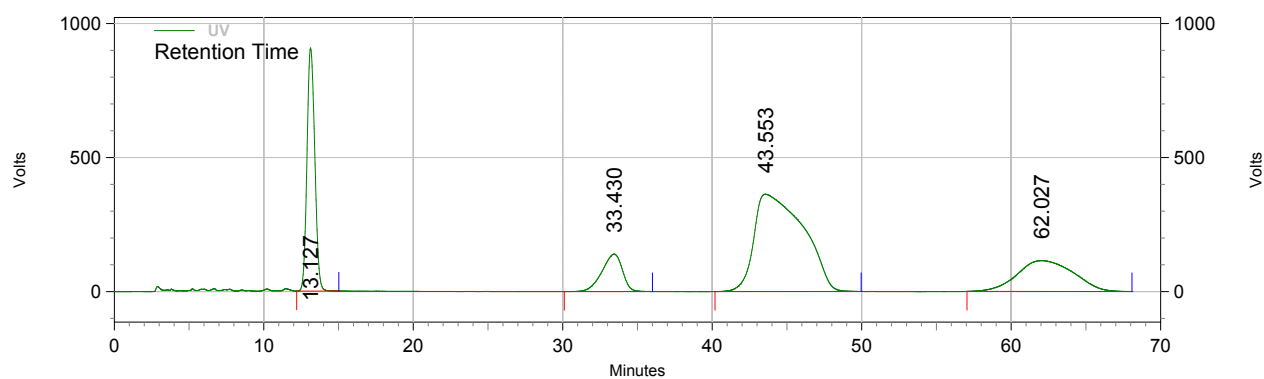

**UV Results**

| Retention Time | Area      | Area % | Height  | Height % |
|----------------|-----------|--------|---------|----------|
| 13.127         | 131888924 | 20.65  | 3629379 | 59.51    |
| 33.430         | 52971200  | 8.29   | 558125  | 9.15     |
| 43.553         | 333423380 | 52.21  | 1451480 | 23.80    |
| 62.027         | 120378914 | 18.85  | 460042  | 7.54     |

|        |           |        |         |        |
|--------|-----------|--------|---------|--------|
| Totals | 638662418 | 100.00 | 6099026 | 100.00 |
|--------|-----------|--------|---------|--------|

**Table 1: Entry 4**

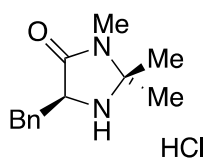

Data File: C:\EZChrom Elite\Enterprise\Projects\Fran\diels alder\fk111a 80.20 70 min ojnew col 222nm new OJ.dat

Method: C:\EZChrom Elite\Enterprise\Projects\Fran\diels alder\80.20 1ml 222nm 60 min.met

Acquired: 12/08/2015 06:10:02

Printed: 12/08/2015 10:04:20

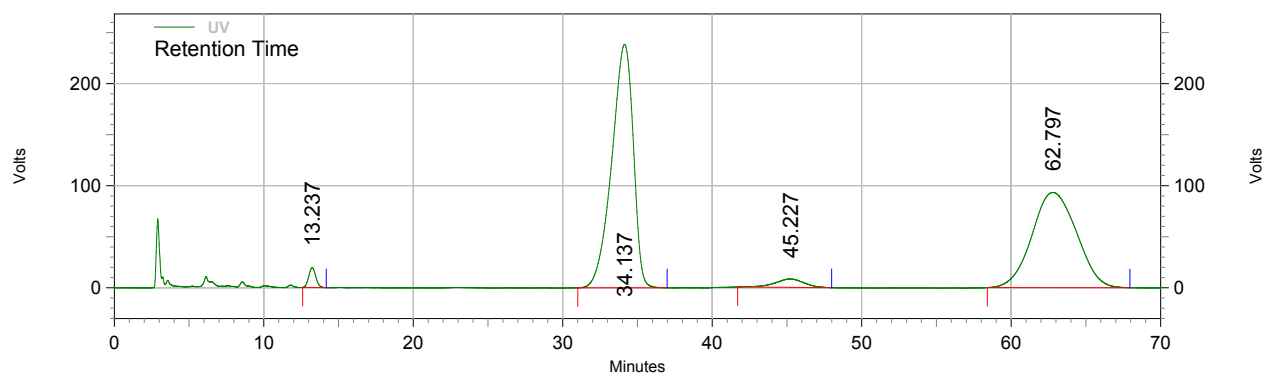

**UV Results**

| Retention Time | Area     | Area % | Height | Height % |
|----------------|----------|--------|--------|----------|
| 13.237         | 2535884  | 1.41   | 77678  | 5.40     |
| 34.137         | 95500448 | 53.13  | 953999 | 66.36    |
| 45.227         | 4462090  | 2.48   | 33011  | 2.30     |
| 62.797         | 77264272 | 42.98  | 372904 | 25.94    |

|        |           |        |         |        |
|--------|-----------|--------|---------|--------|
| Totals | 179762694 | 100.00 | 1437592 | 100.00 |
|--------|-----------|--------|---------|--------|



**Table 1: Entry 9**

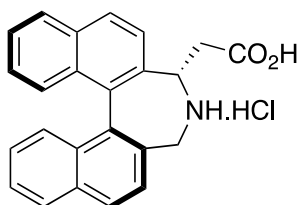

Data File: C:\EZChrom Elite\Enterprise\Projects\Fran\diels alder\fk105a 80.20 70 min ojnew col 222nm new OJ.dat

Method: C:\EZChrom Elite\Enterprise\Projects\Fran\diels alder\80.20 1ml 222nm 60 min.met

Acquired: 12/08/2015 10:55:10

Printed: 12/08/2015 16:12:07

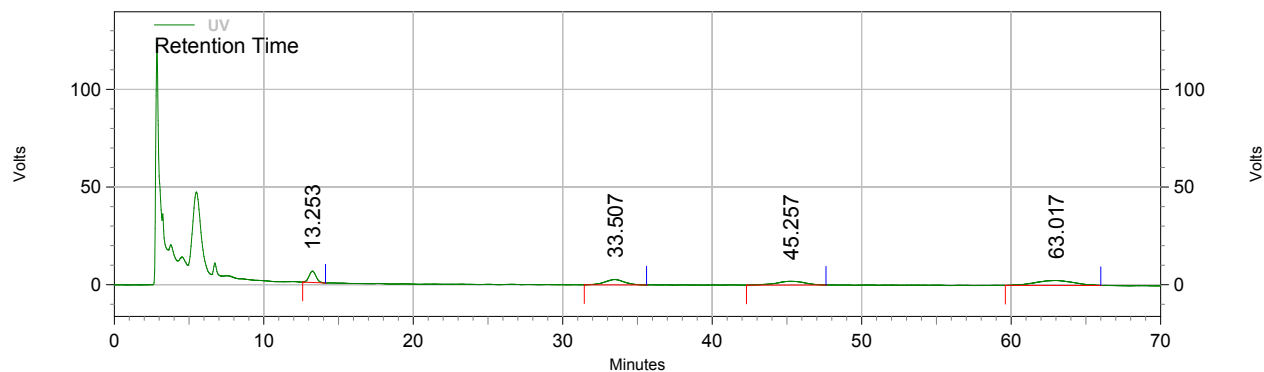

**UV Results**

| Retention Time | Area    | Area % | Height | Height % |
|----------------|---------|--------|--------|----------|
| 13.253         | 751905  | 16.38  | 23162  | 44.59    |
| 33.507         | 1001477 | 21.82  | 10940  | 21.06    |
| 45.257         | 1047410 | 22.82  | 7748   | 14.92    |
| 63.017         | 1789119 | 38.98  | 10092  | 19.43    |

|        |         |        |       |        |
|--------|---------|--------|-------|--------|
| Totals | 4589911 | 100.00 | 51942 | 100.00 |
|--------|---------|--------|-------|--------|

**Table 1: Entry 10**

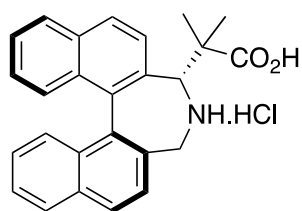

Data File: C:\EZChrom Elite\Enterprise\Projects\Fran\diels alder\fk106a 80.20 70 min ojnew col 222nm new OJ.dat

Method: C:\EZChrom Elite\Enterprise\Projects\Fran\diels alder\80.20 1ml 222nm 60 min.met

Acquired: 12/08/2015 08:32:35

Printed: 12/08/2015 10:01:41

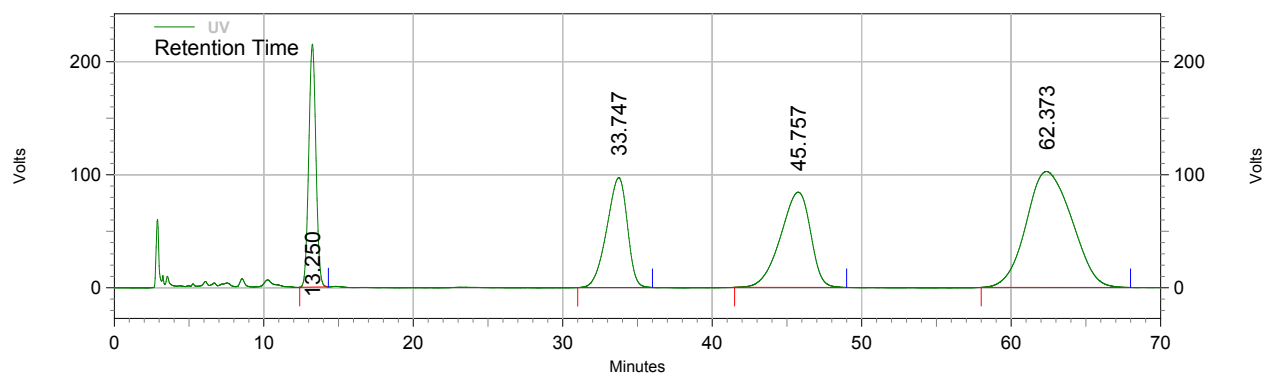

**UV Results**

| Retention Time | Area     | Area % | Height | Height % |
|----------------|----------|--------|--------|----------|
| 13.250         | 28787746 | 14.39  | 859465 | 43.07    |
| 33.747         | 37159913 | 18.57  | 388520 | 19.47    |
| 45.757         | 47032218 | 23.51  | 337013 | 16.89    |
| 62.373         | 87102801 | 43.53  | 410333 | 20.56    |

|        |           |        |         |        |
|--------|-----------|--------|---------|--------|
| Totals | 200082678 | 100.00 | 1995331 | 100.00 |
|--------|-----------|--------|---------|--------|

**Table 1: Entry 11**

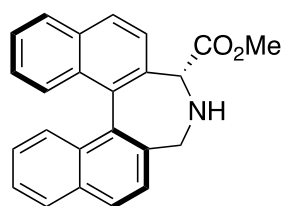

Data File: C:\EZChrom Elite\Enterprise\Projects\Fran\diels alder\fk115a 80.20 70 min ojnew col 222nm new OJ.dat

Method: C:\EZChrom Elite\Enterprise\Projects\Fran\diels alder\80.20 1ml 222nm 60 min.met

Acquired: 11/08/2015 21:51:29

Printed: 12/08/2015 10:25:56

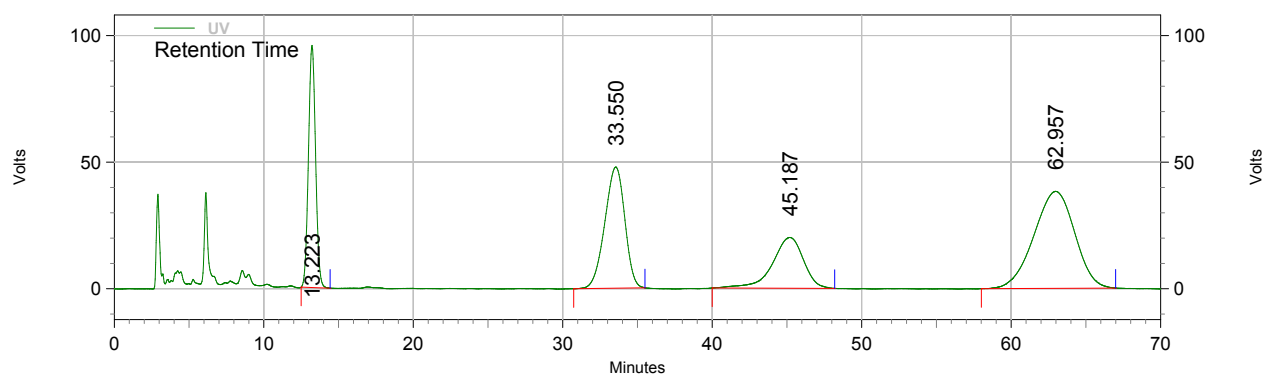

### UV Results

| Retention Time | Area     | Area % | Height | Height % |
|----------------|----------|--------|--------|----------|
| 13.223         | 12692405 | 17.83  | 382644 | 47.37    |
| 33.550         | 17808685 | 25.01  | 191505 | 23.71    |
| 45.187         | 11576366 | 16.26  | 80270  | 9.94     |
| 62.957         | 29122669 | 40.90  | 153312 | 18.98    |

| Totals |          |        |        |        |
|--------|----------|--------|--------|--------|
|        | 71200125 | 100.00 | 807731 | 100.00 |

**Table 1: Entry 12**

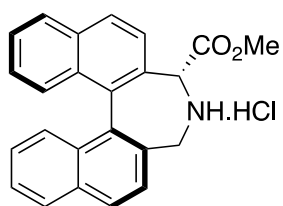

Data File: C:\EZChrom Elite\Enterprise\Projects\Fran\diels alder\fk122a 80.20 70 min ojnew col 222nm new OJ.dat

Method: C:\EZChrom Elite\Enterprise\Projects\Fran\diels alder\80.20 1ml 222nm 60 min.met

Acquired: 12/08/2015 02:36:15

Printed: 12/08/2015 10:36:00

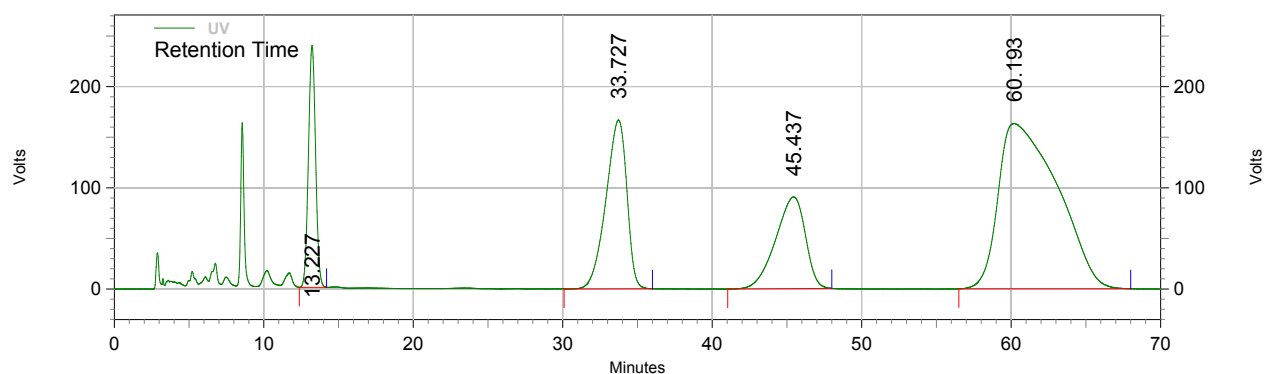

**UV Results**

| Retention Time | Area      | Area % | Height | Height % |
|----------------|-----------|--------|--------|----------|
| 13.227         | 31895315  | 9.75   | 956531 | 36.24    |
| 33.727         | 64867738  | 19.83  | 667327 | 25.28    |
| 45.437         | 50082498  | 15.31  | 362259 | 13.72    |
| 60.193         | 180191602 | 55.10  | 653465 | 24.76    |

|        |           |        |         |        |
|--------|-----------|--------|---------|--------|
| Totals | 327037153 | 100.00 | 2639582 | 100.00 |
|--------|-----------|--------|---------|--------|

**Table 1: Entry 13**

Data File: C:\EZChrom Elite\Enterprise\Projects\Fran\fk155a OJ col 70min 80.20 1ml 222nm.dat

Method: C:\EZChrom Elite\Enterprise\Projects\Fran\diels alder\80.20 1ml 222nm 70 min.met

Acquired: 18/09/2015 21:49:54

Printed: 19/09/2015 10:11:22

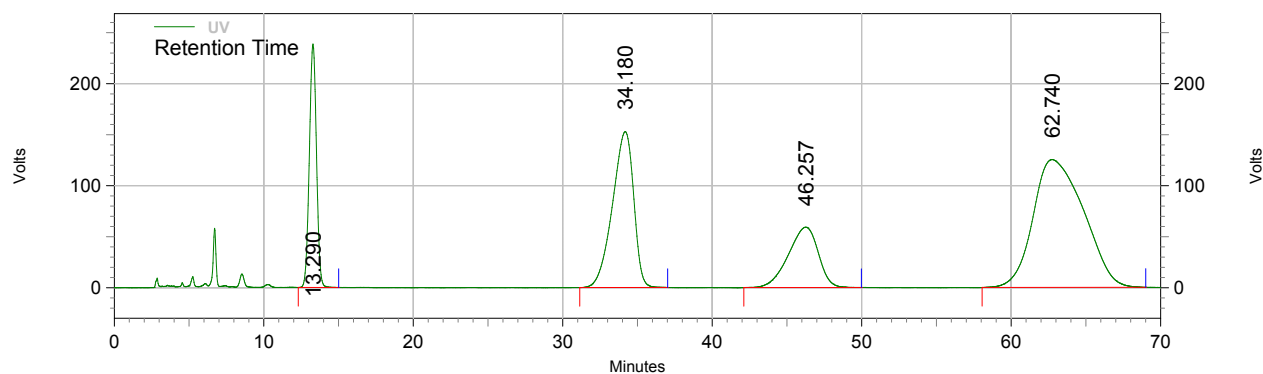

**UV Results**

| Retention Time | Area      | Area % | Height | Height % |
|----------------|-----------|--------|--------|----------|
| 13.290         | 31628773  | 13.03  | 954437 | 41.43    |
| 34.180         | 60283005  | 24.83  | 611146 | 26.53    |
| 46.257         | 33002472  | 13.59  | 236572 | 10.27    |
| 62.740         | 117891887 | 48.55  | 501415 | 21.77    |

|        |           |        |         |        |
|--------|-----------|--------|---------|--------|
| Totals | 242806137 | 100.00 | 2303570 | 100.00 |
|--------|-----------|--------|---------|--------|

**Table 1: Entry 14**

Data File: C:\EZChrom Elite\Enterprise\Projects\Fran\diels alder\fk150a 80.20 70 min OJ new col 222nm 1 ml.dat

Method: C:\EZChrom Elite\Enterprise\Projects\Fran\diels alder\80.20 1ml 222nm 70 min.met

Acquired: 25/08/2015 19:15:15

Printed: 26/08/2015 10:32:28

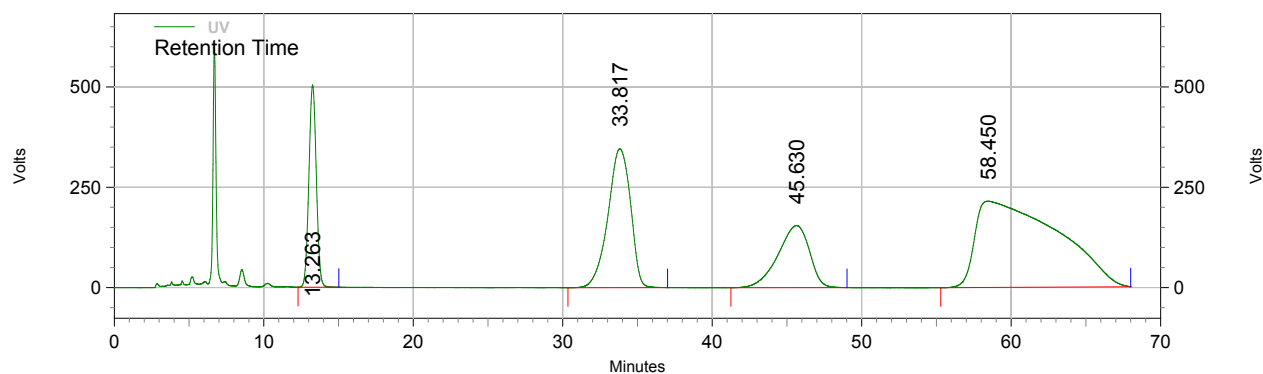

**UV Results**

| Retention Time | Area      | Area % | Height  | Height % |
|----------------|-----------|--------|---------|----------|
| 13.263         | 69612656  | 10.93  | 2016253 | 41.33    |
| 33.817         | 145199395 | 22.80  | 1383630 | 28.36    |
| 45.630         | 90385111  | 14.20  | 618673  | 12.68    |
| 58.450         | 331523585 | 52.07  | 859872  | 17.63    |

|        |           |        |         |        |
|--------|-----------|--------|---------|--------|
| Totals | 636720747 | 100.00 | 4878428 | 100.00 |
|--------|-----------|--------|---------|--------|

**Table 1: Entry 15**

Data File: C:\EZChrom Elite\Enterprise\Projects\Fran\diels alder\fk141A 80.20 70 min OJ 222nm 1 ml.dat

Method: C:\EZChrom Elite\Enterprise\Projects\Fran\diels alder\80.20 1ml 222nm 70 min.met

Acquired: 27/08/2015 13:40:54

Printed: 27/08/2015 15:01:49

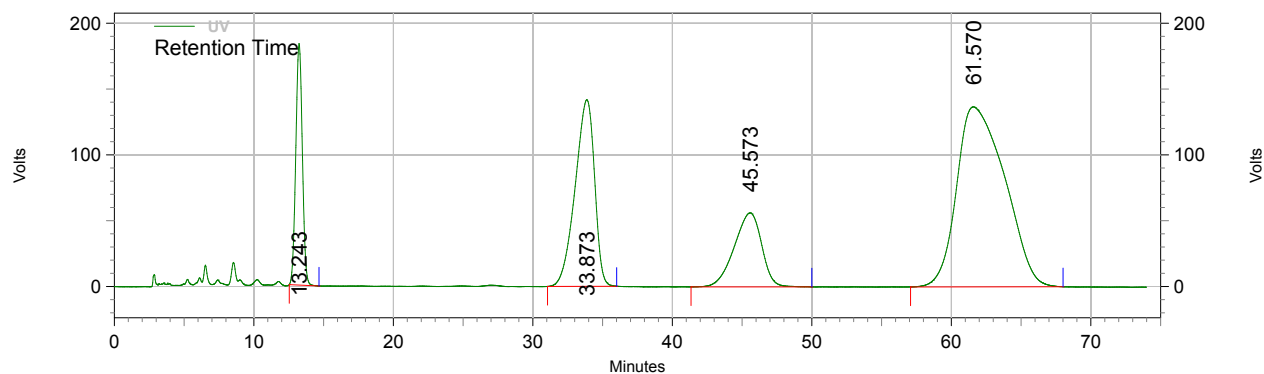

**UV Results**

| Retention Time | Area      | Area % | Height | Height % |
|----------------|-----------|--------|--------|----------|
| 13.243         | 24066176  | 10.00  | 733768 | 35.40    |
| 33.873         | 54790835  | 22.76  | 567050 | 27.36    |
| 45.573         | 30757918  | 12.78  | 224860 | 10.85    |
| 61.570         | 131091183 | 54.46  | 546904 | 26.39    |

|        |           |        |         |        |
|--------|-----------|--------|---------|--------|
| Totals | 240706112 | 100.00 | 2072582 | 100.00 |
|--------|-----------|--------|---------|--------|

**Table 1: Entry 16**

Data File: C:\EZChrom Elite\Enterprise\Projects\Fran\diels alder\fk149A 80.20 70 min OJ 222nm 1 ml.dat

Method: C:\EZChrom Elite\Enterprise\Projects\Fran\diels alder\80.20 1ml 222nm 70 min.met

Acquired: 27/08/2015 14:56:04

Printed: 27/08/2015 16:49:34

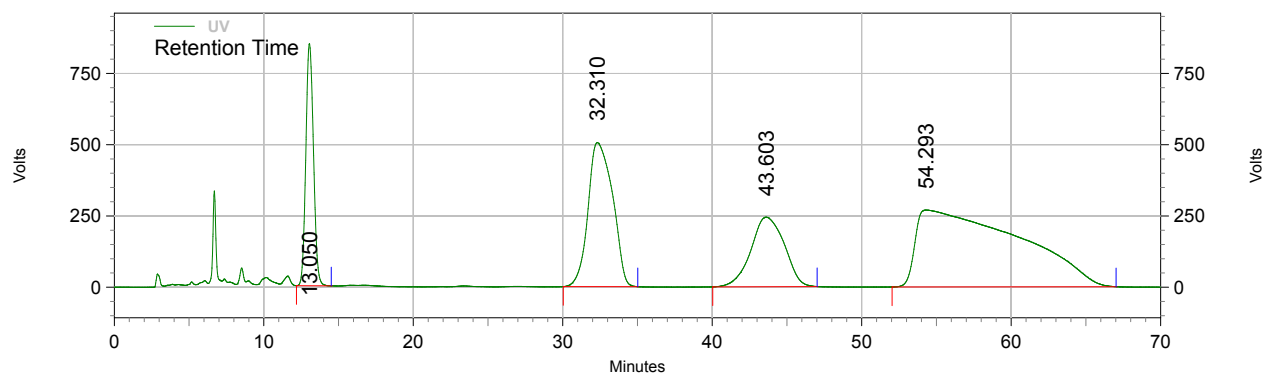

**UV Results**

| Retention Time | Area      | Area % | Height  | Height % |
|----------------|-----------|--------|---------|----------|
| 13.050         | 120621900 | 11.76  | 3397867 | 45.46    |
| 32.310         | 230889588 | 22.51  | 2021312 | 27.04    |
| 43.603         | 151872631 | 14.81  | 976340  | 13.06    |
| 54.293         | 522194865 | 50.92  | 1078936 | 14.43    |

|        |            |        |         |        |
|--------|------------|--------|---------|--------|
| Totals | 1025578984 | 100.00 | 7474455 | 100.00 |
|--------|------------|--------|---------|--------|



**Table 1: Entry 17**

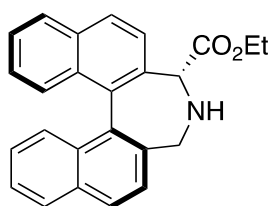

Data File: C:\EZChrom Elite\Enterprise\Projects\Fran\diels alder\fk143A 80.20 70 min OJ 222nm 1 ml.dat

Method: C:\EZChrom Elite\Enterprise\Projects\Fran\diels alder\80.20 1ml 222nm 70 min.met

Acquired: 11/09/2015 11:51:35

Printed: 11/09/2015 13:13:14

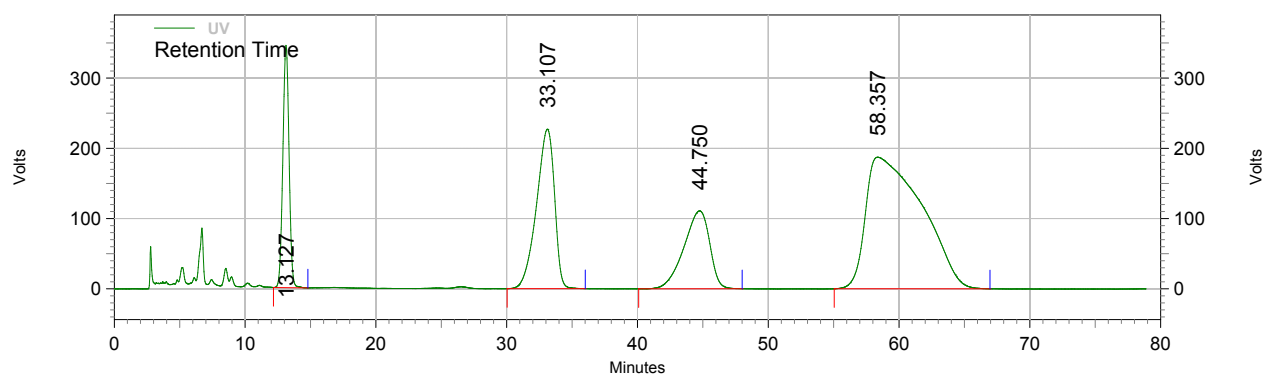

**UV Results**

| Retention Time | Area      | Area % | Height  | Height % |
|----------------|-----------|--------|---------|----------|
| 13.127         | 45428356  | 10.87  | 1379101 | 39.64    |
| 33.107         | 86833598  | 20.78  | 907986  | 26.10    |
| 44.750         | 60782790  | 14.55  | 443364  | 12.74    |
| 58.357         | 224756662 | 53.80  | 749036  | 21.53    |

|        |           |        |         |        |
|--------|-----------|--------|---------|--------|
| Totals | 417801406 | 100.00 | 3479487 | 100.00 |
|--------|-----------|--------|---------|--------|

**Table 1: Entry 18**

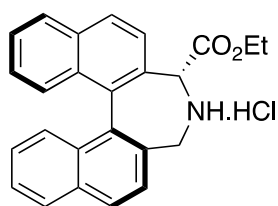

Data File: C:\EZChrom Elite\Enterprise\Projects\Fran\fk156a OJ col 70min 80.20 1ml 222nm.dat

Method: C:\EZChrom Elite\Enterprise\Projects\Fran\diels alder\80.20 1ml 222nm 70 min.met

Acquired: 18/09/2015 19:27:44

Printed: 19/09/2015 10:13:59

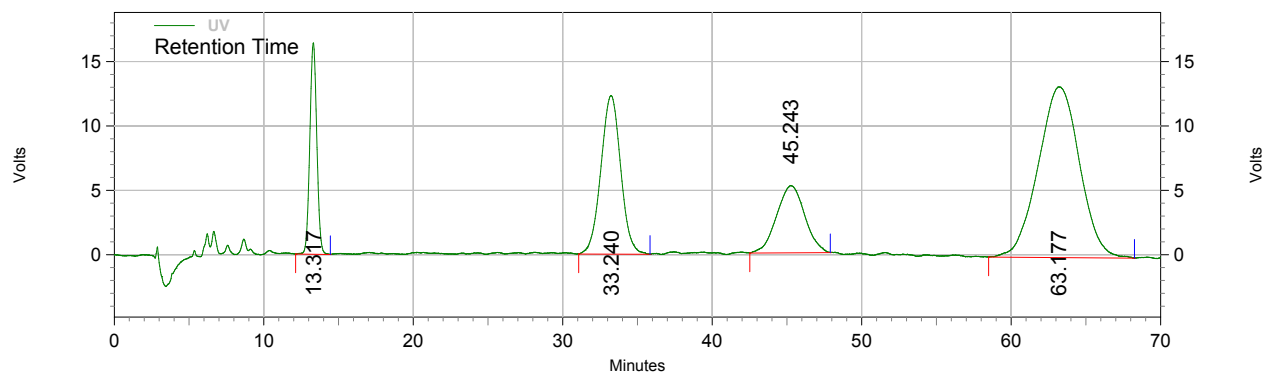

**UV Results**

| Retention Time | Area     | Area % | Height | Height % |
|----------------|----------|--------|--------|----------|
| 13.317         | 2133020  | 10.89  | 65686  | 34.77    |
| 33.240         | 4530531  | 23.13  | 49242  | 26.07    |
| 45.243         | 2725000  | 13.91  | 20940  | 11.09    |
| 63.177         | 10200716 | 52.07  | 53026  | 28.07    |

|        |          |        |        |        |
|--------|----------|--------|--------|--------|
| Totals | 19589267 | 100.00 | 188894 | 100.00 |
|--------|----------|--------|--------|--------|





**Table 1: Entry 21**

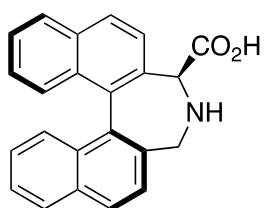

Data File: C:\EZChrom Elite\Enterprise\Projects\Fran\diels alder\fk89a 80.20 70 min ojnew col 222nm new OJ.dat

Method: C:\EZChrom Elite\Enterprise\Projects\Fran\diels alder\80.20 1ml 222nm 60 min.met

Acquired: 12/08/2015 01:25:06

Printed: 12/08/2015 09:47:20

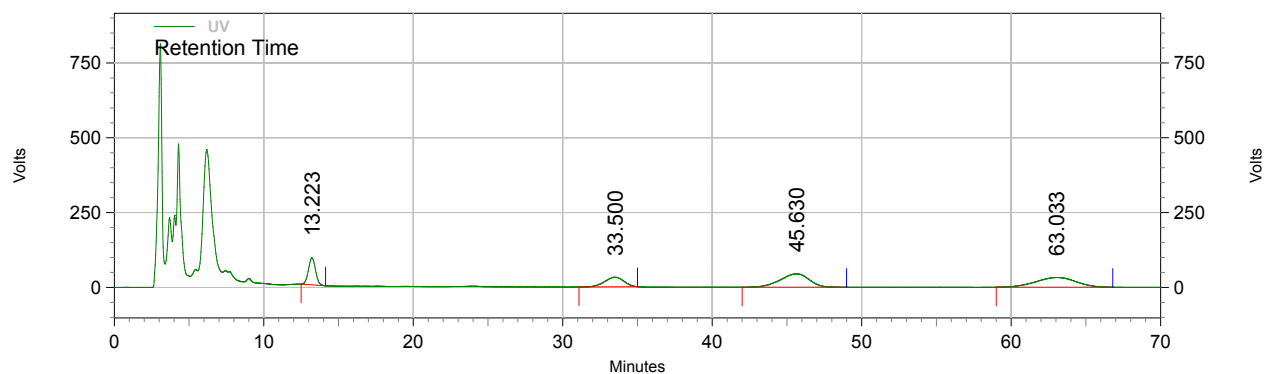

**UV Results**

| Retention Time | Area     | Area % | Height | Height % |
|----------------|----------|--------|--------|----------|
| 13.223         | 11911109 | 16.55  | 361581 | 45.33    |
| 33.500         | 11440553 | 15.90  | 127837 | 16.03    |
| 45.630         | 24172440 | 33.59  | 178657 | 22.40    |
| 63.033         | 24440004 | 33.96  | 129629 | 16.25    |

|        |          |        |        |        |
|--------|----------|--------|--------|--------|
| Totals | 71964106 | 100.00 | 797704 | 100.00 |
|--------|----------|--------|--------|--------|

**Table 1: Entry 23**

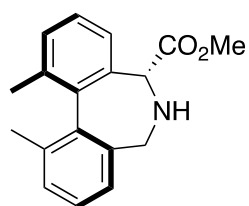

Data File: C:\EZChrom Elite\Enterprise\Projects\Fran\diels alder\fk88a 80.20 70 min ojnew col 222nm new OJ.dat

Method: C:\EZChrom Elite\Enterprise\Projects\Fran\diels alder\80.20 1ml 222nm 60 min.met

Acquired: 12/08/2015 09:43:55

Printed: 12/08/2015 16:09:15

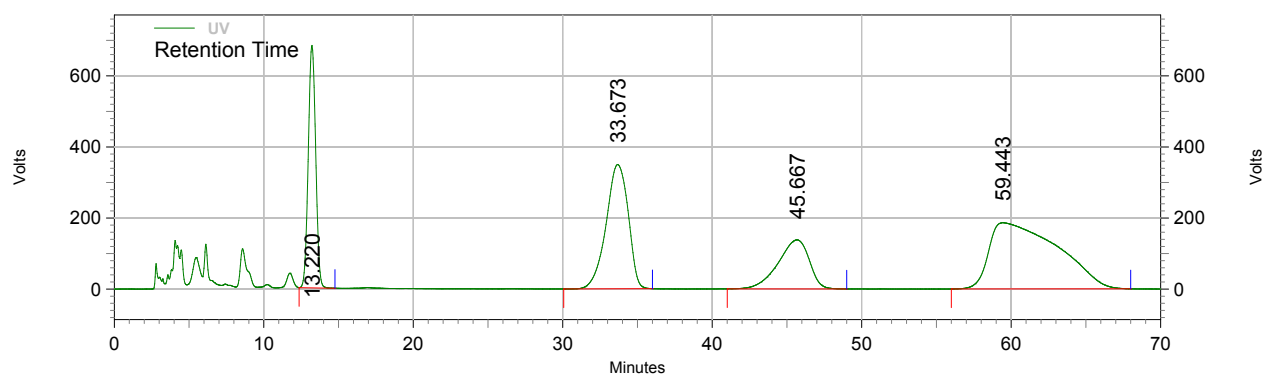

**UV Results**

| Retention Time | Area      | Area % | Height  | Height % |
|----------------|-----------|--------|---------|----------|
| 13.220         | 94254496  | 16.94  | 2729897 | 50.31    |
| 33.673         | 143949344 | 25.88  | 1398691 | 25.78    |
| 45.667         | 80006616  | 14.38  | 551984  | 10.17    |
| 59.443         | 238099322 | 42.80  | 745216  | 13.73    |

|        |           |        |         |        |
|--------|-----------|--------|---------|--------|
| Totals | 556309778 | 100.00 | 5425788 | 100.00 |
|--------|-----------|--------|---------|--------|

**Table 1: Entry 24**

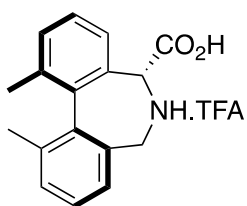

Data File: C:\EZChrom Elite\Enterprise\Projects\Fran\fk144a OJ col 70min 80.20 1ml 222nm.dat

Method: C:\EZChrom Elite\Enterprise\Projects\Fran\diels alder\80.20 1ml 222nm 70 min.met

Acquired: 18/09/2015 18:18:48

Printed: 18/09/2015 19:28:04

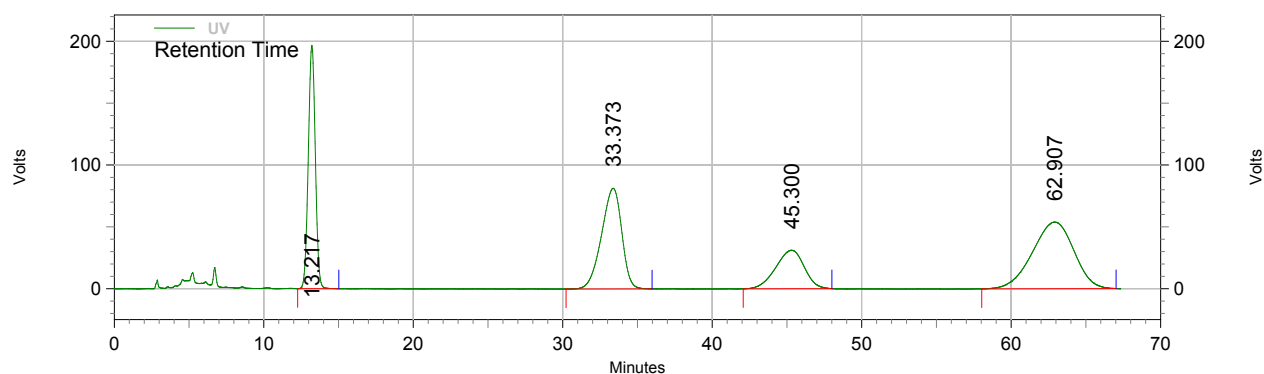

**UV Results**

| Retention Time | Area     | Area % | Height | Height % |
|----------------|----------|--------|--------|----------|
| 13.217         | 25698863 | 22.49  | 786582 | 54.18    |
| 33.373         | 30578984 | 26.76  | 325339 | 22.41    |
| 45.300         | 16499502 | 14.44  | 124453 | 8.57     |
| 62.907         | 41500099 | 36.32  | 215390 | 14.84    |

|        |           |        |         |        |
|--------|-----------|--------|---------|--------|
| Totals | 114277448 | 100.00 | 1451764 | 100.00 |
|--------|-----------|--------|---------|--------|

**Table 2:**

**Racemic trace**

**3-(4-Methoxyphenyl)bicyclo[2.2.1]hept-5-en-2-yl)methanol**

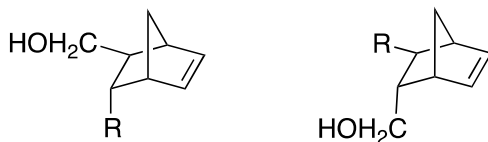

Enantiomeric excesses were determined using Chiralcel® AS-3 column (hexane/iPrOH=95:5,  $\lambda=222$  nm), 0.5 mL; *endo* isomer ( $t_R$  35 min, 59 min) *exo* isomer ( $t_R$  39 min, 56 min)).

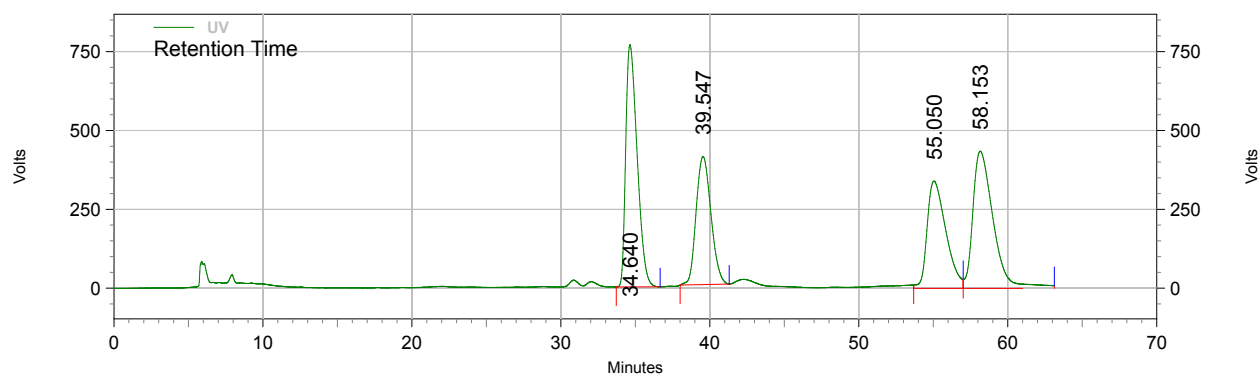

**UV Results**

| Retention Time | Area      | Area % | Height  | Height % |
|----------------|-----------|--------|---------|----------|
| 34.640         | 163558053 | 29.20  | 3072756 | 39.40    |
| 39.547         | 112346323 | 20.06  | 1624898 | 20.84    |
| 55.050         | 118755971 | 21.20  | 1360526 | 17.45    |
| 58.153         | 165465336 | 29.54  | 1739711 | 22.31    |
| Totals         | 560125683 | 100.00 | 7797891 | 100.00   |



**Table 2: Entry 1**

Data File: C:\EZChrom Elite\Enterprise\Projects\Fran\diels alder\fk127a 95.5 60 min AS-3  
222nm 0.5ml.dat

Method: C:\EZChrom Elite\Enterprise\Projects\Fran\diels alder\95.5 0.5ml 254nm 70 min.met

Acquired: 25/08/2015 11:53:47

Printed: 25/08/2015 15:08:53

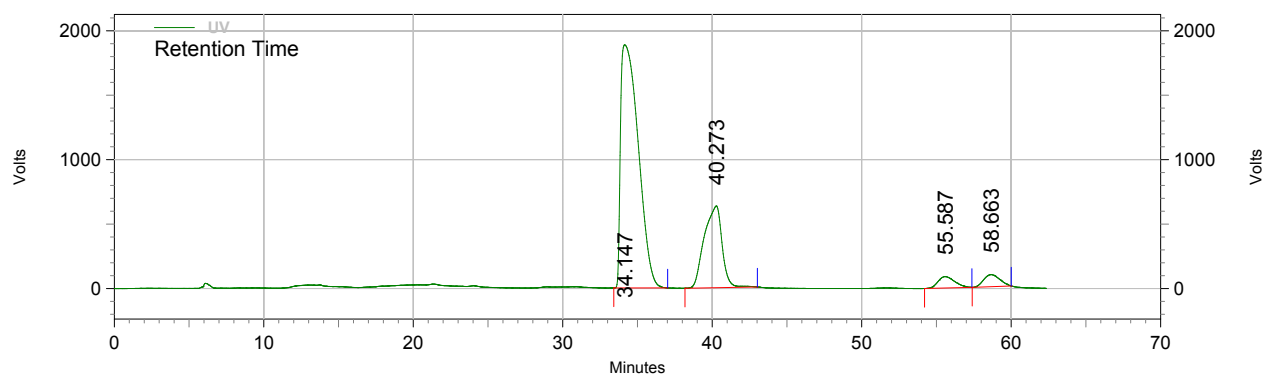

**UV Results**

| Retention Time | Area      | Area % | Height  | Height % |
|----------------|-----------|--------|---------|----------|
| 34.147         | 621306304 | 70.07  | 7545500 | 69.80    |
| 40.273         | 209866962 | 23.67  | 2536428 | 23.46    |
| 55.587         | 27427539  | 3.09   | 354425  | 3.28     |
| 58.663         | 28036378  | 3.16   | 374410  | 3.46     |

|        |           |        |          |        |
|--------|-----------|--------|----------|--------|
| Totals | 886637183 | 100.00 | 10810763 | 100.00 |
|--------|-----------|--------|----------|--------|

**Table 2: Entry 2**

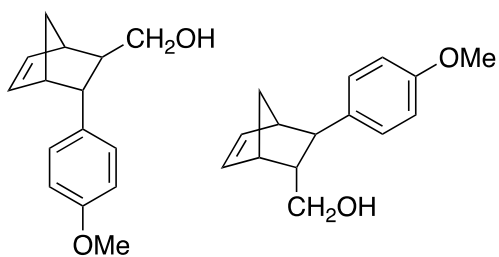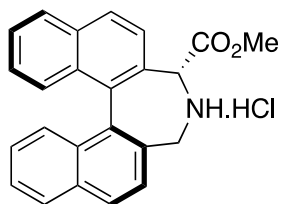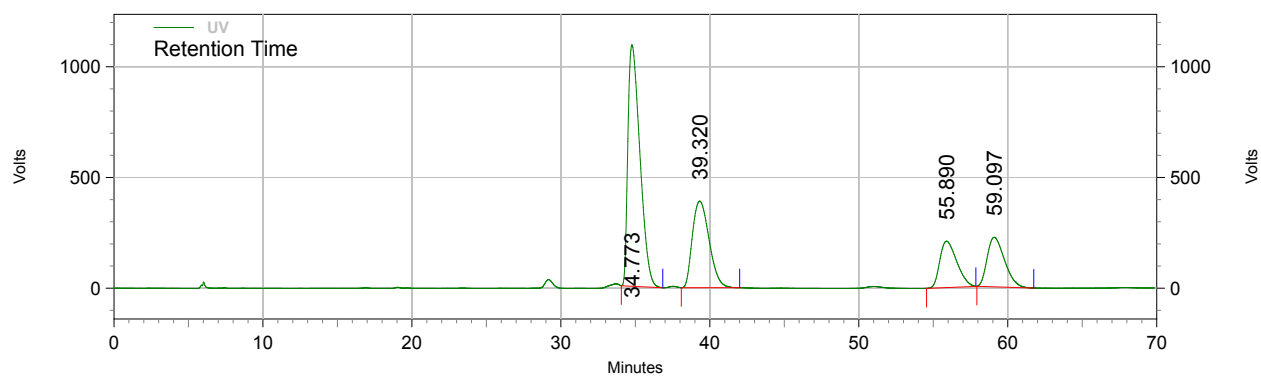

**UV Results**

| Retention Time | Area      | Area % | Height  | Height % |
|----------------|-----------|--------|---------|----------|
| 34.773         | 244782841 | 48.39  | 4362457 | 56.96    |
| 39.320         | 122076450 | 24.13  | 1563928 | 20.42    |
| 55.890         | 66366689  | 13.12  | 838484  | 10.95    |
| 59.097         | 72598464  | 14.35  | 894406  | 11.68    |

|        |           |        |         |        |
|--------|-----------|--------|---------|--------|
| Totals | 505824444 | 100.00 | 7659275 | 100.00 |
|--------|-----------|--------|---------|--------|

## Racemic trace

### 3-(2-Methoxyphenyl)bicyclo[2.2.1]hept-5-en-2-yl)methanol

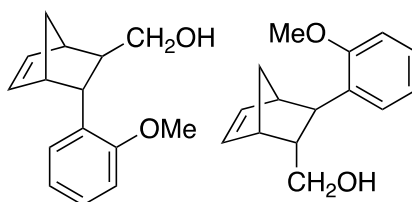

Enantiomeric excesses were determined using Chiralcel® AD-H column (hexane/iPrOH=98:2,  $\lambda=222$  nm), 0.5 mL; *endo* isomer ( $t_R$  65 min, 80 min) *exo* isomer ( $t_R$  57 min, 69 min)).

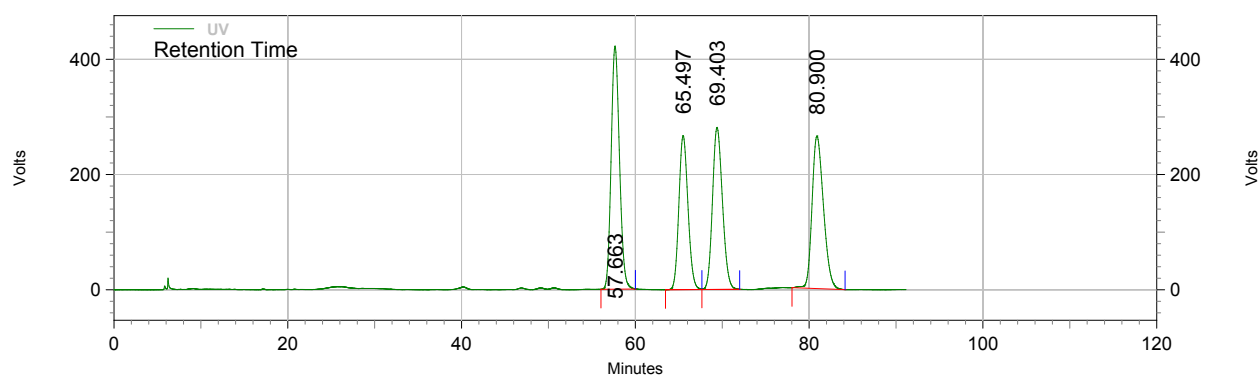

## UV Results

| Retention Time | Area      | Area % | Height  | Height % |
|----------------|-----------|--------|---------|----------|
| 57.663         | 112116054 | 29.82  | 1687969 | 34.15    |
| 65.497         | 77688234  | 20.67  | 1069444 | 21.64    |
| 69.403         | 89562179  | 23.82  | 1125462 | 22.77    |
| 80.900         | 96566392  | 25.69  | 1059634 | 21.44    |

|        |           |        |         |        |
|--------|-----------|--------|---------|--------|
| Totals | 375932859 | 100.00 | 4942509 | 100.00 |
|--------|-----------|--------|---------|--------|

**Table 2: Entry 3**

Data File: C:\EZChrom Elite\Enterprise\Projects\Fran\diels alder\fk126A 98.2 90 min AD-H 222nm 0.5 ml.dat

Method: C:\EZChrom Elite\Enterprise\Projects\Fran\diels alder\98.2 0.5ml 222nm 90 min.met

Acquired: 26/08/2015 17:04:04

Printed: 26/08/2015 18:38:23

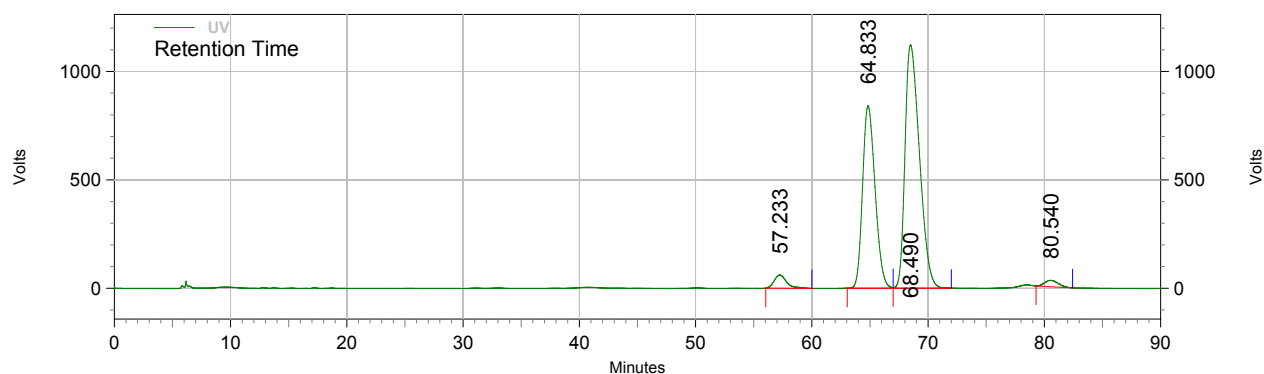

**UV Results**

| Retention Time | Area      | Area % | Height  | Height % |
|----------------|-----------|--------|---------|----------|
| 57.233         | 18253405  | 2.74   | 245313  | 2.98     |
| 64.833         | 251635736 | 37.71  | 3368507 | 40.97    |
| 68.490         | 387917941 | 58.13  | 4490546 | 54.62    |
| 80.540         | 9517660   | 1.43   | 117705  | 1.43     |

|        |           |        |         |        |
|--------|-----------|--------|---------|--------|
| Totals | 667324742 | 100.00 | 8222071 | 100.00 |
|--------|-----------|--------|---------|--------|

**Table 2: Entry 4**

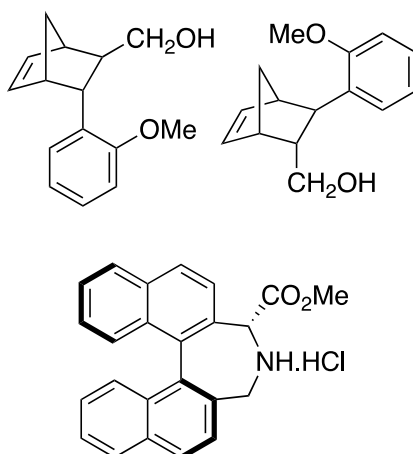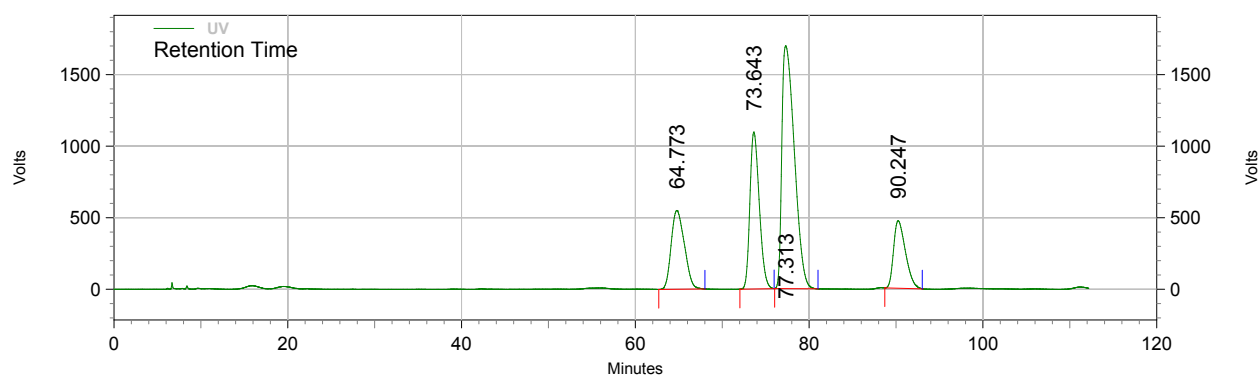

**UV Results**

| Retention Time | Area      | Area % | Height  | Height % |
|----------------|-----------|--------|---------|----------|
| 64.773         | 232326523 | 16.35  | 2201612 | 14.42    |
| 73.643         | 329047246 | 23.16  | 4387511 | 28.74    |
| 77.313         | 679753155 | 47.85  | 6788242 | 44.47    |
| 90.247         | 179479029 | 12.63  | 1887803 | 12.37    |

|        |            |        |          |        |
|--------|------------|--------|----------|--------|
| Totals | 1420605953 | 100.00 | 15265168 | 100.00 |
|--------|------------|--------|----------|--------|

## Racemic trace

### 3-(4-Nitrophenyl)bicyclo[2.2.1]hept-5-en-2-yl)methanol

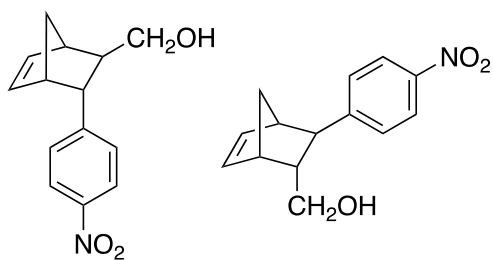

Enantiomeric excesses were determined using Chiralcel® AD-H column (hexane/iPrOH=90:10,  $\lambda=254$  nm), 0.5 mL; *endo* isomer ( $t_R$  49 min, 57 min) *exo* isomer ( $t_R$  43 min, 53 min)).

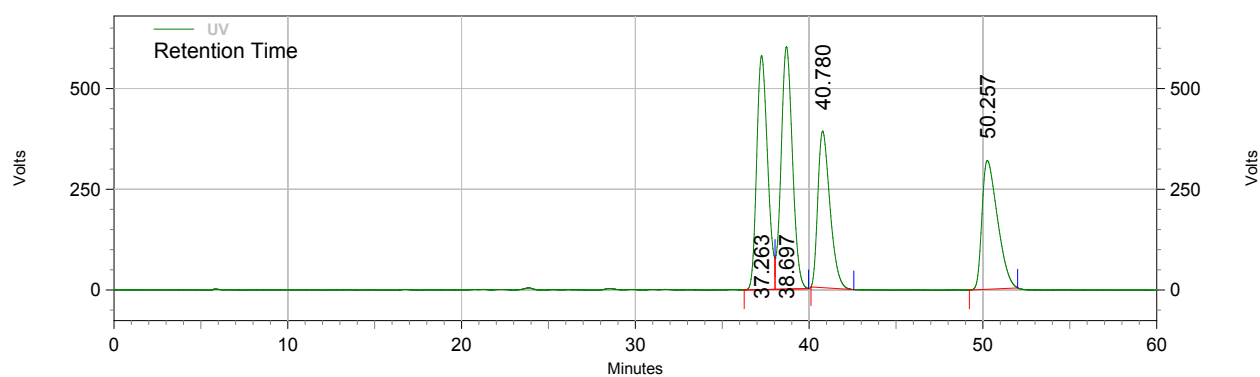

## UV Results

| Retention Time | Area      | Area % | Height  | Height % |
|----------------|-----------|--------|---------|----------|
| 37.263         | 101429900 | 27.78  | 2325141 | 30.72    |
| 38.697         | 109077192 | 29.88  | 2409635 | 31.84    |
| 40.780         | 75191423  | 20.60  | 1555653 | 20.55    |
| 50.257         | 79372910  | 21.74  | 1278614 | 16.89    |
| Totals         | 365071425 | 100.00 | 7569043 | 100.00   |

Table 2: Entry 5

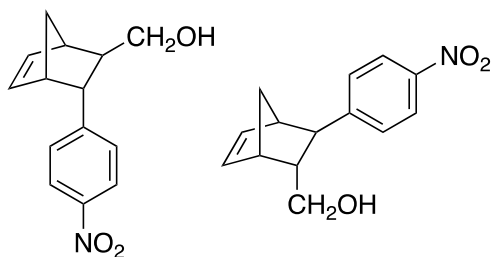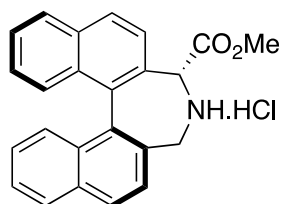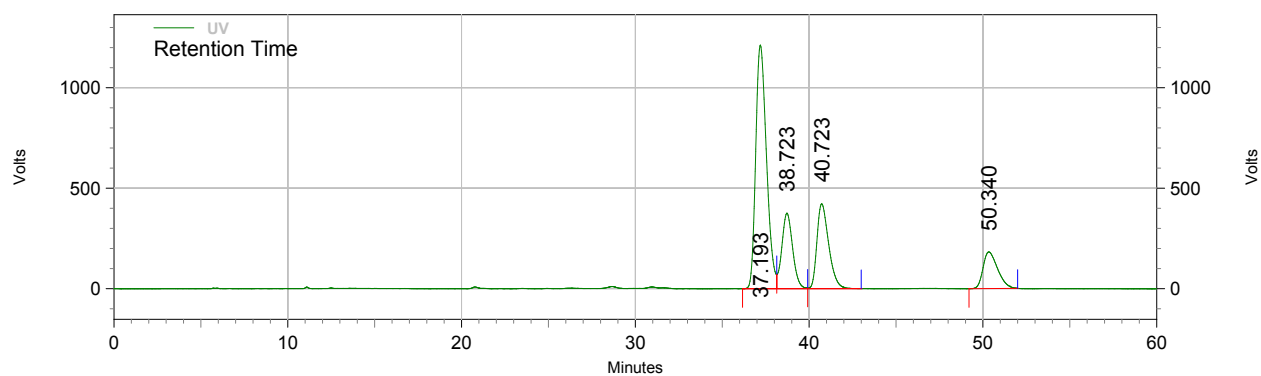

UV Results

| Retention Time | Area      | Area % | Height  | Height % |
|----------------|-----------|--------|---------|----------|
| 37.193         | 208648627 | 52.80  | 4848600 | 55.28    |
| 38.723         | 64947736  | 16.43  | 1503547 | 17.14    |
| 40.723         | 79165321  | 20.03  | 1688706 | 19.25    |
| 50.340         | 42443003  | 10.74  | 729707  | 8.32     |
| Totals         | 395204687 | 100.00 | 8770560 | 100.00   |

## Racemic trace

### 3-(2-Nitrophenyl)bicyclo[2.2.1]hept-5-en-2-yl)methanol

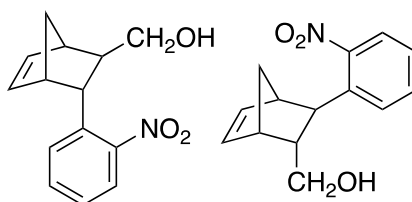

Enantiomeric excesses were determined using Chiralcel® AD-H column (hexane/iPrOH=95:5,  $\lambda=254$  nm), 0.5 mL; *endo* isomer ( $t_R$  37 min, 39 min) *exo* isomer ( $t_R$  41 min, 50 min)).

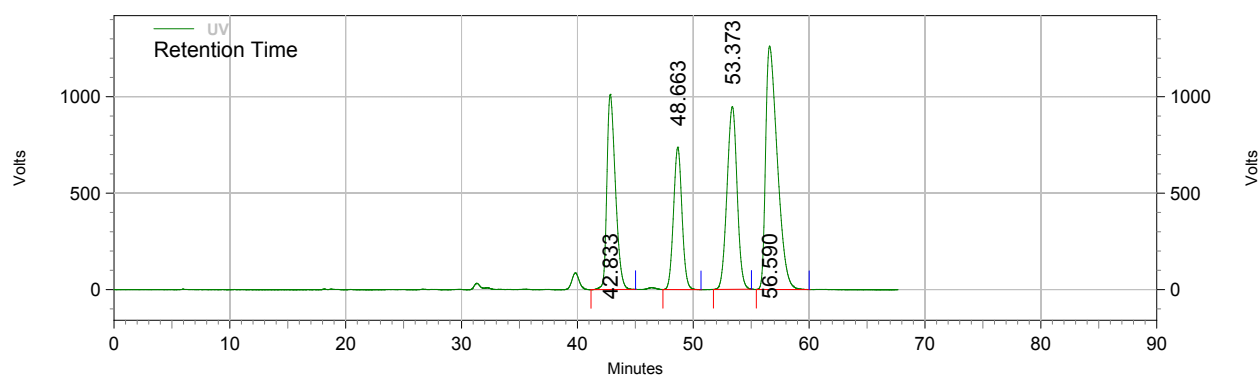

## UV Results

| Retention Time | Area      | Area % | Height   | Height % |
|----------------|-----------|--------|----------|----------|
| 42.833         | 206808907 | 21.99  | 4048777  | 25.56    |
| 48.663         | 150125042 | 15.96  | 2952648  | 18.64    |
| 53.373         | 229614645 | 24.41  | 3792924  | 23.94    |
| 56.590         | 354062576 | 37.64  | 5049003  | 31.87    |
| Totals         | 940611170 | 100.00 | 15843352 | 100.00   |



**Table 2: Entry 6**

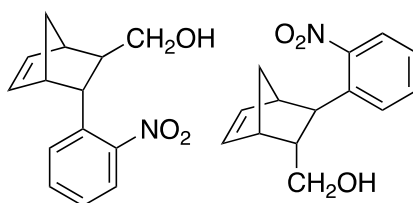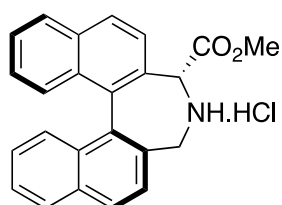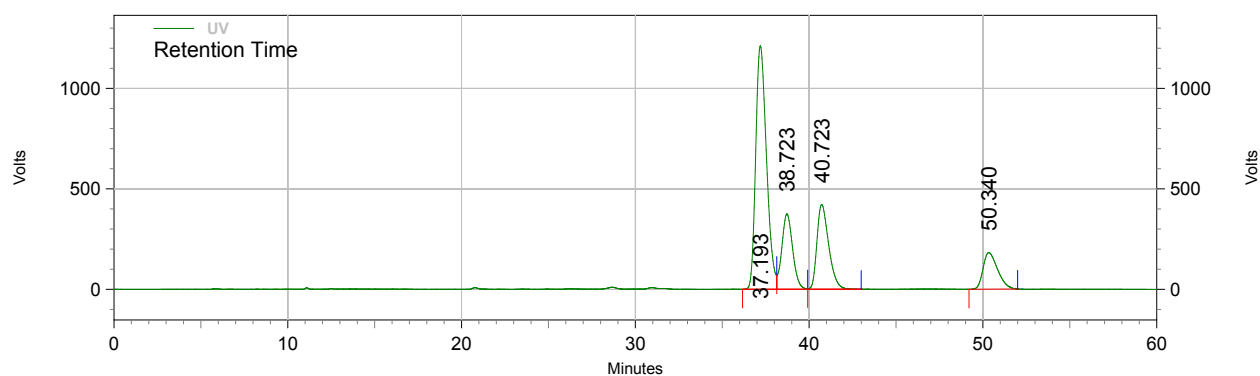

**UV Results**

| Retention Time | Area      | Area % | Height  | Height % |
|----------------|-----------|--------|---------|----------|
| 37.193         | 208648627 | 52.80  | 4848600 | 55.28    |
| 38.723         | 64947736  | 16.43  | 1503547 | 17.14    |
| 40.723         | 79165321  | 20.03  | 1688706 | 19.25    |
| 50.340         | 42443003  | 10.74  | 729707  | 8.32     |

|        |           |        |         |        |
|--------|-----------|--------|---------|--------|
| Totals | 395204687 | 100.00 | 8770560 | 100.00 |
|--------|-----------|--------|---------|--------|

## Extras

### DMSO

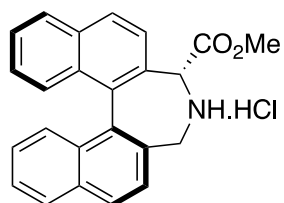

Data File: C:\EZChrom Elite\Enterprise\Projects\Fran\diels alder\fk119a 80.20 70 min ojnew col 222nm new OJ.dat

Method: C:\EZChrom Elite\Enterprise\Projects\Fran\diels alder\80.20 1ml 222nm 60 min.met

Acquired: 12/08/2015 00:13:56

Printed: 12/08/2015 10:28:22

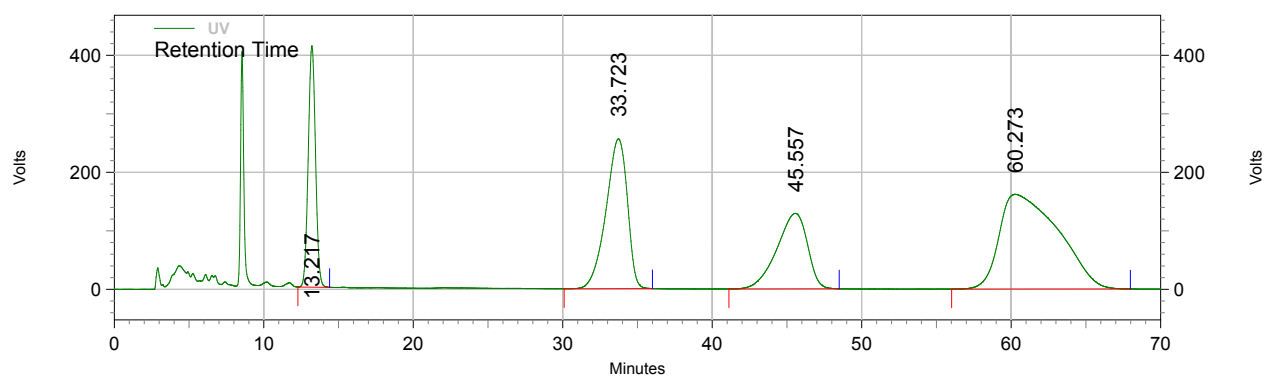

### UV Results

| Retention Time | Area      | Area % | Height  | Height % |
|----------------|-----------|--------|---------|----------|
| 13.217         | 55890096  | 13.68  | 1651198 | 43.01    |
| 33.723         | 101626015 | 24.87  | 1024026 | 26.67    |
| 45.557         | 73475052  | 17.98  | 516098  | 13.44    |
| 60.273         | 177699782 | 43.48  | 647663  | 16.87    |

| Totals | Area      | Area % | Height  | Height % |
|--------|-----------|--------|---------|----------|
|        | 408690945 | 100.00 | 3838985 | 100.00   |

## Area % Report

MeOH

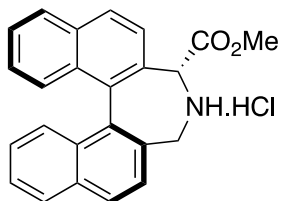

Data File: C:\EZChrom Elite\Enterprise\Projects\Fran\diels alder\fk120a 80.20 70 min ojnew col 222nm new OJ.dat

Method: C:\EZChrom Elite\Enterprise\Projects\Fran\diels alder\80.20 1ml 222nm 60 min.met

Acquired: 11/08/2015 23:02:42

Printed: 12/08/2015 10:30:47

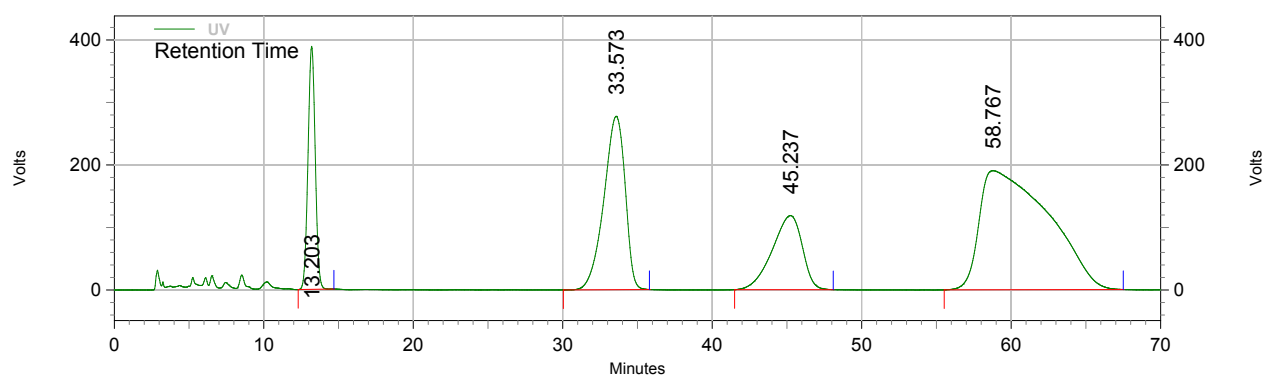

## UV Results

| Retention Time | Area      | Area % | Height  | Height % |
|----------------|-----------|--------|---------|----------|
| 13.203         | 52399515  | 11.06  | 1555104 | 39.86    |
| 33.573         | 109823275 | 23.18  | 1109560 | 28.44    |
| 45.237         | 66181909  | 13.97  | 474323  | 12.16    |
| 58.767         | 245313138 | 51.78  | 762016  | 19.53    |

|        |           |        |         |        |
|--------|-----------|--------|---------|--------|
| Totals | 473717837 | 100.00 | 3901003 | 100.00 |
|--------|-----------|--------|---------|--------|

## Area % Report

### DCM



Data File: C:\EZChrom Elite\Enterprise\Projects\Fran\diels alder\fk121a 80.20 70 min ojnew col 222nm new OJ.dat

Method: C:\EZChrom Elite\Enterprise\Projects\Fran\diels alder\80.20 1ml 222nm 60 min.met

Acquired: 12/08/2015 03:47:31

Printed: 12/08/2015 10:33:05

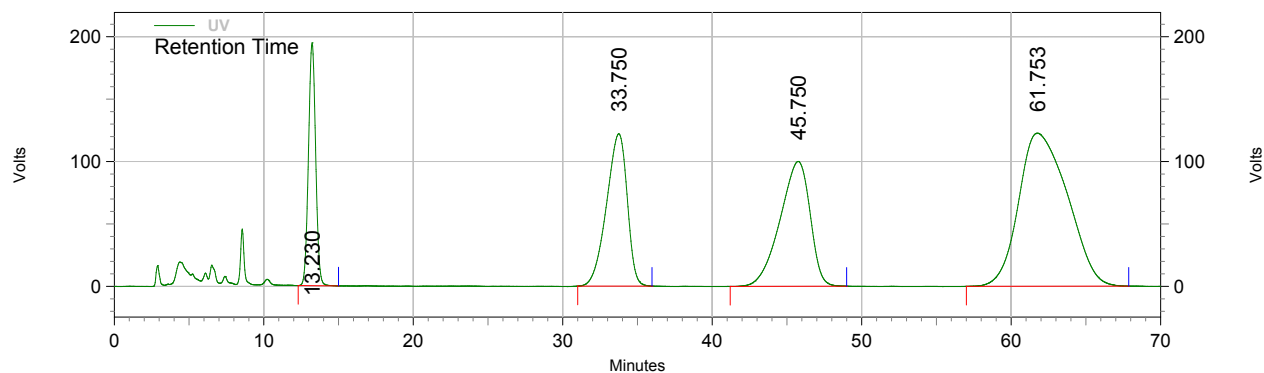

### UV Results

| Retention Time | Area      | Area % | Height | Height % |
|----------------|-----------|--------|--------|----------|
| 13.230         | 26024299  | 10.83  | 778147 | 36.07    |
| 33.750         | 46967516  | 19.55  | 488398 | 22.64    |
| 45.750         | 55930542  | 23.28  | 400235 | 18.55    |
| 61.753         | 111333006 | 46.34  | 490645 | 22.74    |

|        |           |        |         |        |
|--------|-----------|--------|---------|--------|
| Totals | 240255363 | 100.00 | 2157425 | 100.00 |
|--------|-----------|--------|---------|--------|

## Area % Report

MeOH:H<sub>2</sub>O



Data File: C:\EZChrom Elite\Enterprise\Projects\Fran\diels alder\fk90a 80.20 70 min ojnew col 222nm new OJ.dat

Method: C:\EZChrom Elite\Enterprise\Projects\Fran\diels alder\80.20 1ml 222nm 60 min.met

Acquired: 11/08/2015 20:40:19

Printed: 12/08/2015 09:50:32

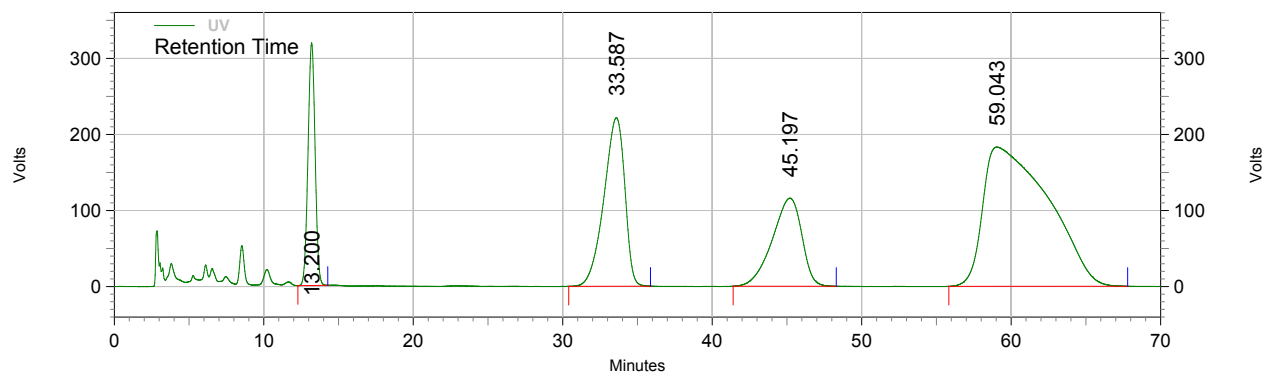

### UV Results

| Retention Time | Area      | Area % | Height  | Height % |
|----------------|-----------|--------|---------|----------|
| 13.200         | 42115716  | 10.15  | 1276100 | 38.00    |
| 33.587         | 86078004  | 20.75  | 886733  | 26.40    |
| 45.197         | 63615376  | 15.34  | 463155  | 13.79    |
| 59.043         | 223016583 | 53.76  | 732413  | 21.81    |

| Totals | Area      | Area % | Height  | Height % |
|--------|-----------|--------|---------|----------|
|        | 414825679 | 100.00 | 3358401 | 100.00   |

## Area % Report

EtOH:H<sub>2</sub>O



Data File: C:\EZChrom Elite\Enterprise\Projects\Fran\diels alder\fk130a 80.20 70 min ojnew col 222nm new OJ.dat

Method: C:\EZChrom Elite\Enterprise\Projects\Fran\diels alder\80.20 1ml 222nm 70 min.met

Acquired: 13/08/2015 12:31:21

Printed: 13/08/2015 13:50:39

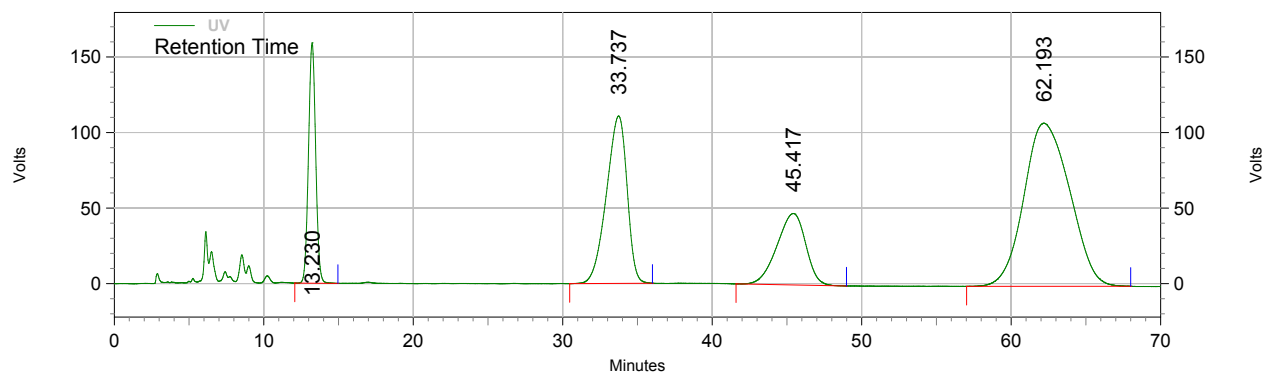

### UV Results

| Retention Time | Area     | Area % | Height | Height % |
|----------------|----------|--------|--------|----------|
| 13.230         | 21307907 | 11.75  | 636421 | 37.42    |
| 33.737         | 42518471 | 23.44  | 443333 | 26.06    |
| 45.417         | 25355990 | 13.98  | 189325 | 11.13    |
| 62.193         | 92178605 | 50.83  | 431894 | 25.39    |

|        |           |        |         |        |
|--------|-----------|--------|---------|--------|
| Totals | 181360973 | 100.00 | 1700973 | 100.00 |
|--------|-----------|--------|---------|--------|

## Area % Report

THF:H<sub>2</sub>O

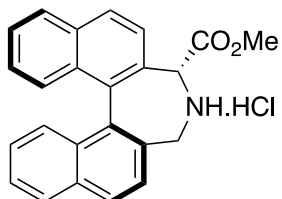

Data File: C:\EZChrom Elite\Enterprise\Projects\Fran\diels alder\fk132a 80.20 70 min ojnew col 222nm new OJ.dat

Method: C:\EZChrom Elite\Enterprise\Projects\Fran\diels alder\80.20 1ml 222nm 60 min.met

Acquired: 12/08/2015 13:17:43

Printed: 12/08/2015 15:51:40

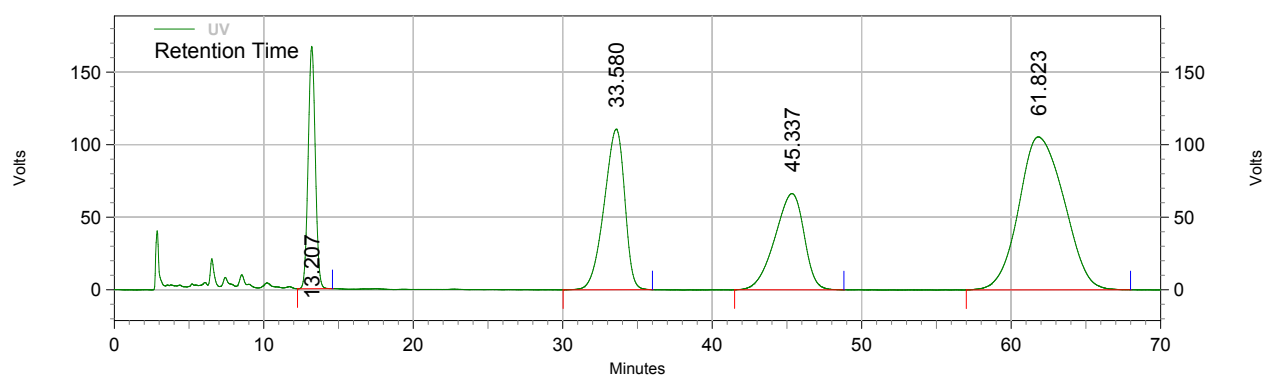

## UV Results

| Retention Time | Area     | Area % | Height | Height % |
|----------------|----------|--------|--------|----------|
| 13.207         | 22225410 | 11.73  | 668225 | 37.17    |
| 33.580         | 42284116 | 22.32  | 442747 | 24.63    |
| 45.337         | 36111913 | 19.07  | 265336 | 14.76    |
| 61.823         | 88787139 | 46.88  | 421628 | 23.45    |

| Totals | Area      | Area % | Height  | Height % |
|--------|-----------|--------|---------|----------|
|        | 189408578 | 100.00 | 1797936 | 100.00   |

## Area % Report

DMF:H<sub>2</sub>O



Data File: C:\EZChrom Elite\Enterprise\Projects\Fran\diels alder\fk133a 80.20 70 min ojnew col 222nm new OJ.dat

Method: C:\EZChrom Elite\Enterprise\Projects\Fran\diels alder\80.20 1ml 222nm 60 min.met

Acquired: 12/08/2015 14:28:56

Printed: 12/08/2015 15:53:59

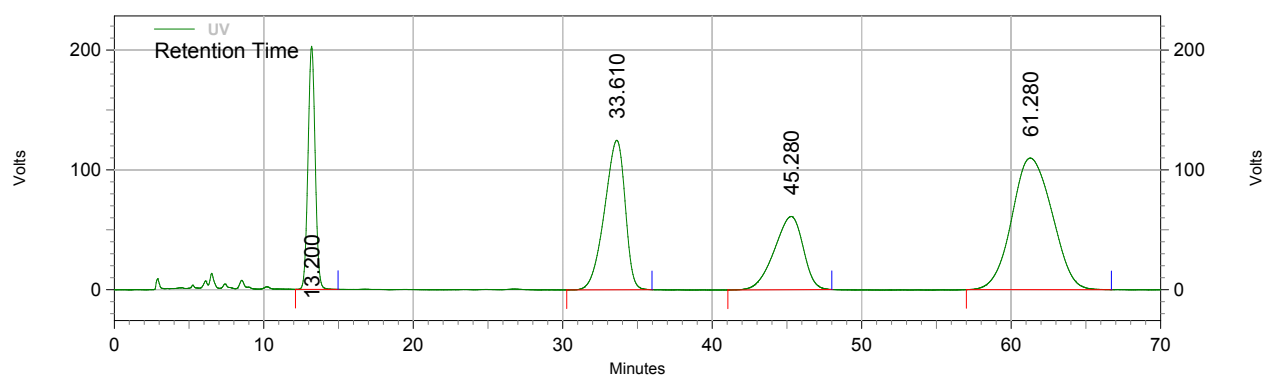

### UV Results

| Retention Time | Area     | Area % | Height | Height % |
|----------------|----------|--------|--------|----------|
| 13.200         | 27068837 | 14.26  | 811312 | 40.69    |
| 33.610         | 47814006 | 25.18  | 499001 | 25.02    |
| 45.280         | 32831882 | 17.29  | 244522 | 12.26    |
| 61.280         | 82159769 | 43.27  | 439294 | 22.03    |

|        |           |        |         |        |
|--------|-----------|--------|---------|--------|
| Totals | 189874494 | 100.00 | 1994129 | 100.00 |
|--------|-----------|--------|---------|--------|



## Area % Report

CH<sub>2</sub>NO<sub>2</sub>:H<sub>2</sub>O



Data File: C:\EZChrom Elite\Enterprise\Projects\Fran\diels alder\fk128a 80.20 70 min ojnew col 222nm new OJ.dat

Method: C:\EZChrom Elite\Enterprise\Projects\Fran\diels alder\80.20 1ml 222nm 60 min.met

Acquired: 12/08/2015 16:05:19

Printed: 12/08/2015 17:35:11

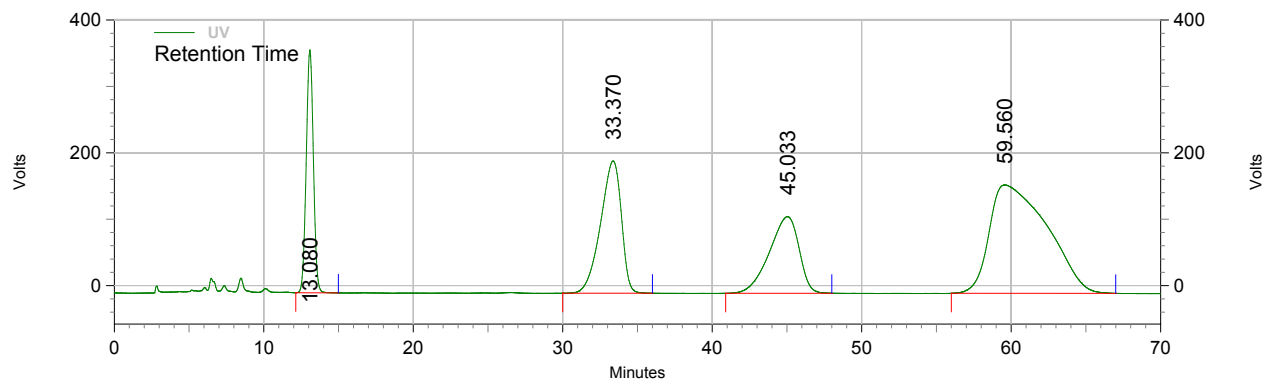

## UV Results

| Retention Time | Area      | Area % | Height  | Height % |
|----------------|-----------|--------|---------|----------|
| 13.080         | 48745952  | 13.35  | 1463413 | 43.36    |
| 33.370         | 77109017  | 21.12  | 796852  | 23.61    |
| 45.033         | 63875285  | 17.50  | 461735  | 13.68    |
| 59.560         | 175361503 | 48.03  | 652775  | 19.34    |

| Totals | Area      | Area % | Height  | Height % |
|--------|-----------|--------|---------|----------|
|        | 365091757 | 100.00 | 3374775 | 100.00   |

## Computational Supplementary Information

Cartesian coordinates for all 16 transition structures calculated at B3LYP/6-31G\*

### z-endo-si-a

---

|    |   |   |           |           |           |
|----|---|---|-----------|-----------|-----------|
| 1  | 6 | 0 | -2.489319 | -0.519059 | 0.621655  |
| 2  | 6 | 0 | -1.559452 | -0.681484 | 1.645625  |
| 3  | 6 | 0 | -0.017063 | 0.413801  | -0.578955 |
| 4  | 6 | 0 | -0.536043 | 0.399879  | 1.897124  |
| 5  | 1 | 0 | 0.738119  | 0.919854  | -1.188198 |
| 6  | 1 | 0 | -1.006209 | 1.387405  | 1.951693  |
| 7  | 1 | 0 | -0.005911 | 0.220752  | 2.834818  |
| 8  | 7 | 0 | 0.484814  | 0.436553  | 0.813862  |
| 9  | 6 | 0 | -1.307332 | 1.205111  | -0.723901 |
| 10 | 6 | 0 | -2.491191 | 0.770410  | -0.132765 |
| 11 | 6 | 0 | -1.266683 | 2.413552  | -1.461716 |
| 12 | 1 | 0 | -0.339244 | 2.711566  | -1.945212 |
| 13 | 6 | 0 | -3.657090 | 1.609255  | -0.199621 |
| 14 | 6 | 0 | -3.601173 | 2.826054  | -0.959805 |
| 15 | 6 | 0 | -2.389394 | 3.191860  | -1.598253 |
| 16 | 6 | 0 | -4.752411 | 3.655462  | -1.038700 |
| 17 | 6 | 0 | -1.534118 | -1.863552 | 2.425248  |
| 18 | 6 | 0 | -3.370610 | -1.605882 | 0.292338  |
| 19 | 6 | 0 | -2.426377 | -2.878416 | 2.181348  |
| 20 | 6 | 0 | -3.347275 | -2.789390 | 1.104543  |
| 21 | 1 | 0 | -0.810472 | -1.955172 | 3.231341  |
| 22 | 6 | 0 | -4.225887 | -3.863110 | 0.797401  |
| 23 | 6 | 0 | 1.782277  | 0.470467  | 1.108052  |
| 24 | 1 | 0 | 1.990377  | 0.479119  | 2.176129  |
| 25 | 6 | 0 | -0.117773 | -1.010774 | -1.178554 |
| 26 | 8 | 0 | -0.739149 | -1.238715 | -2.187536 |
| 27 | 8 | 0 | 0.625126  | -1.900573 | -0.506499 |
| 28 | 6 | 0 | 0.601110  | -3.247068 | -1.034495 |
| 29 | 1 | 0 | -0.414769 | -3.644670 | -0.988331 |
| 30 | 1 | 0 | 0.948444  | -3.254099 | -2.069794 |
| 31 | 1 | 0 | 1.271461  | -3.819329 | -0.394346 |
| 32 | 6 | 0 | 2.875233  | 0.470936  | 0.243327  |
| 33 | 6 | 0 | 3.128030  | 3.164011  | 0.344850  |
| 34 | 6 | 0 | 4.227517  | 0.290250  | 0.734581  |
| 35 | 1 | 0 | 2.706214  | 0.399502  | -0.823473 |
| 36 | 6 | 0 | 4.387087  | 2.719729  | -0.325967 |
| 37 | 6 | 0 | 3.346615  | 3.220598  | 1.718997  |
| 38 | 1 | 0 | 2.261859  | 3.562909  | -0.171800 |
| 39 | 6 | 0 | 5.060453  | 1.954868  | 0.811153  |
| 40 | 1 | 0 | 4.258489  | -0.008863 | 1.781506  |
| 41 | 1 | 0 | 4.996610  | 3.615512  | -0.532057 |
| 42 | 1 | 0 | 4.268515  | 2.187371  | -1.269423 |
| 43 | 6 | 0 | 4.550662  | 2.568867  | 2.001017  |
| 44 | 1 | 0 | 6.117643  | 1.712524  | 0.748208  |
| 45 | 1 | 0 | 4.975755  | 2.439942  | 2.991509  |
| 46 | 1 | 0 | 2.672091  | 3.653419  | 2.449211  |

|    |   |   |           |           |           |
|----|---|---|-----------|-----------|-----------|
| 47 | 6 | 0 | 5.182676  | -0.551559 | -0.069572 |
| 48 | 6 | 0 | 6.129613  | -1.326691 | 0.617615  |
| 49 | 6 | 0 | 5.181029  | -0.585460 | -1.472419 |
| 50 | 6 | 0 | 7.042925  | -2.121290 | -0.074024 |
| 51 | 1 | 0 | 6.146440  | -1.314067 | 1.705292  |
| 52 | 6 | 0 | 6.095865  | -1.377503 | -2.165109 |
| 53 | 1 | 0 | 4.460388  | -0.004285 | -2.041317 |
| 54 | 6 | 0 | 7.029805  | -2.148003 | -1.469213 |
| 55 | 1 | 0 | 7.761837  | -2.719840 | 0.477699  |
| 56 | 1 | 0 | 6.076045  | -1.395068 | -3.250910 |
| 57 | 1 | 0 | 7.740269  | -2.765041 | -2.011049 |
| 58 | 6 | 0 | -5.070418 | -3.794531 | -0.286017 |
| 59 | 6 | 0 | -4.235832 | -1.583346 | -0.836430 |
| 60 | 6 | 0 | -5.061736 | -2.648878 | -1.116629 |
| 61 | 1 | 0 | -4.208843 | -4.746760 | 1.430225  |
| 62 | 1 | 0 | -5.734429 | -4.622782 | -0.515412 |
| 63 | 1 | 0 | -5.708823 | -2.612825 | -1.988172 |
| 64 | 1 | 0 | -4.230318 | -0.720627 | -1.492101 |
| 65 | 6 | 0 | -4.863131 | 1.311533  | 0.495795  |
| 66 | 6 | 0 | -5.907729 | 3.322860  | -0.371855 |
| 67 | 6 | 0 | -5.955423 | 2.145128  | 0.411691  |
| 68 | 1 | 0 | -4.918056 | 0.418106  | 1.106311  |
| 69 | 1 | 0 | -2.421161 | -3.774766 | 2.796014  |
| 70 | 1 | 0 | -6.863031 | 1.898400  | 0.954913  |
| 71 | 1 | 0 | -6.780844 | 3.965611  | -0.434856 |
| 72 | 1 | 0 | -4.697653 | 4.565793  | -1.630080 |
| 73 | 1 | 0 | -2.356938 | 4.107059  | -2.183261 |

-----

**z-endo-si-b**

---

|    |   |   |           |           |           |
|----|---|---|-----------|-----------|-----------|
| 1  | 6 | 0 | 2.442254  | -0.553497 | -0.714201 |
| 2  | 6 | 0 | 1.513092  | -0.728257 | -1.736758 |
| 3  | 6 | 0 | 0.001651  | 0.541539  | 0.420952  |
| 4  | 6 | 0 | 0.533706  | 0.380700  | -2.043716 |
| 5  | 1 | 0 | -0.736899 | 1.115778  | 0.991404  |
| 6  | 1 | 0 | 1.039892  | 1.347156  | -2.133100 |
| 7  | 1 | 0 | 0.004155  | 0.184112  | -2.978021 |
| 8  | 7 | 0 | -0.490241 | 0.494417  | -0.970899 |
| 9  | 6 | 0 | 1.324905  | 1.281425  | 0.535049  |
| 10 | 6 | 0 | 2.493921  | 0.771180  | -0.025206 |
| 11 | 6 | 0 | 1.331198  | 2.525338  | 1.213731  |
| 12 | 1 | 0 | 0.412329  | 2.888390  | 1.668057  |
| 13 | 6 | 0 | 3.693568  | 1.563153  | 0.011943  |
| 14 | 6 | 0 | 3.684802  | 2.815191  | 0.714294  |
| 15 | 6 | 0 | 2.484821  | 3.261514  | 1.323386  |
| 16 | 6 | 0 | 4.869954  | 3.597770  | 0.763919  |
| 17 | 6 | 0 | 1.433839  | -1.949739 | -2.447585 |
| 18 | 6 | 0 | 3.269484  | -1.660709 | -0.318164 |
| 19 | 6 | 0 | 2.268697  | -2.993657 | -2.134625 |
| 20 | 6 | 0 | 3.186500  | -2.888361 | -1.057330 |
| 21 | 1 | 0 | 0.708528  | -2.053622 | -3.250371 |

|    |   |   |           |           |           |
|----|---|---|-----------|-----------|-----------|
| 22 | 6 | 0 | 4.004544  | -3.987071 | -0.678793 |
| 23 | 6 | 0 | -1.790176 | 0.443617  | -1.260673 |
| 24 | 1 | 0 | -1.998493 | 0.394678  | -2.327897 |
| 25 | 6 | 0 | -0.030229 | -0.884099 | 1.031829  |
| 26 | 8 | 0 | -0.678203 | -1.796831 | 0.575547  |
| 27 | 8 | 0 | 0.673515  | -0.919478 | 2.165961  |
| 28 | 6 | 0 | 0.682245  | -2.189566 | 2.858250  |
| 29 | 1 | 0 | 1.150756  | -2.950736 | 2.231256  |
| 30 | 1 | 0 | 1.266651  | -2.019160 | 3.761336  |
| 31 | 1 | 0 | -0.337754 | -2.493388 | 3.103803  |
| 32 | 6 | 0 | -2.876133 | 0.429978  | -0.389944 |
| 33 | 6 | 0 | -4.218657 | 0.249722  | -0.879780 |
| 34 | 6 | 0 | -3.184477 | 3.220293  | -0.458441 |
| 35 | 1 | 0 | -2.702372 | 0.370123  | 0.676553  |
| 36 | 6 | 0 | -5.072211 | 1.947796  | -0.975154 |
| 37 | 1 | 0 | -4.250519 | 0.057533  | -1.953923 |
| 38 | 6 | 0 | -3.999893 | 2.803406  | -1.639920 |
| 39 | 6 | 0 | -3.962250 | 3.122634  | 0.682849  |
| 40 | 1 | 0 | -2.202949 | 3.677077  | -0.522604 |
| 41 | 6 | 0 | -5.143247 | 2.429707  | 0.362623  |
| 42 | 1 | 0 | -5.986133 | 1.695763  | -1.507264 |
| 43 | 1 | 0 | -4.497759 | 3.699753  | -2.045736 |
| 44 | 1 | 0 | -3.446086 | 2.344813  | -2.460409 |
| 45 | 1 | 0 | -5.940315 | 2.198133  | 1.059914  |
| 46 | 1 | 0 | -3.690543 | 3.481149  | 1.669316  |
| 47 | 6 | 0 | -5.173655 | -0.645274 | -0.147750 |
| 48 | 6 | 0 | -6.077711 | -1.415512 | -0.893385 |
| 49 | 6 | 0 | -5.202043 | -0.743532 | 1.251695  |
| 50 | 6 | 0 | -6.982130 | -2.269258 | -0.260682 |
| 51 | 1 | 0 | -6.068363 | -1.354546 | -1.979576 |
| 52 | 6 | 0 | -6.105377 | -1.594341 | 1.884732  |
| 53 | 1 | 0 | -4.517020 | -0.156562 | 1.858226  |
| 54 | 6 | 0 | -6.998716 | -2.360823 | 1.130627  |
| 55 | 1 | 0 | -7.670271 | -2.861784 | -0.856291 |
| 56 | 1 | 0 | -6.110956 | -1.662582 | 2.968774  |
| 57 | 1 | 0 | -7.701227 | -3.023852 | 1.626617  |
| 58 | 6 | 0 | 4.137595  | -1.614132 | 0.808791  |
| 59 | 6 | 0 | 4.849913  | -3.898416 | 0.402438  |
| 60 | 6 | 0 | 4.905221  | -2.703013 | 1.158101  |
| 61 | 1 | 0 | 2.217020  | -3.924953 | -2.692205 |
| 62 | 1 | 0 | 3.939830  | -4.905942 | -1.255750 |
| 63 | 1 | 0 | 5.467570  | -4.745677 | 0.685536  |
| 64 | 1 | 0 | 5.558716  | -2.645050 | 2.023929  |
| 65 | 1 | 0 | 4.187107  | -0.708988 | 1.402914  |
| 66 | 6 | 0 | 4.890082  | 1.182049  | -0.658904 |
| 67 | 6 | 0 | 6.014421  | 3.185224  | 0.123369  |
| 68 | 6 | 0 | 6.016842  | 1.971180  | -0.604129 |
| 69 | 1 | 0 | 2.486184  | 4.205975  | 1.860967  |
| 70 | 1 | 0 | 4.850470  | 4.537189  | 1.310374  |
| 71 | 1 | 0 | 6.913614  | 3.792925  | 0.163192  |
| 72 | 1 | 0 | 6.916316  | 1.661165  | -1.128093 |

|    |   |   |          |          |           |
|----|---|---|----------|----------|-----------|
| 73 | 1 | 0 | 4.909605 | 0.259741 | -1.227333 |
|----|---|---|----------|----------|-----------|

**z-endo-re-a**

---

|    |   |   |           |           |           |
|----|---|---|-----------|-----------|-----------|
| 1  | 6 | 0 | 2.566595  | -0.365218 | -0.487147 |
| 2  | 6 | 0 | 1.699855  | -1.011039 | -1.365491 |
| 3  | 6 | 0 | -0.056062 | 0.395607  | 0.487453  |
| 4  | 6 | 0 | 0.488920  | -0.277302 | -1.890183 |
| 5  | 1 | 0 | -0.901309 | 0.904413  | 0.959321  |
| 6  | 1 | 0 | 0.760658  | 0.711079  | -2.275807 |
| 7  | 1 | 0 | 0.016673  | -0.841171 | -2.697255 |
| 8  | 7 | 0 | -0.538042 | -0.086936 | -0.825947 |
| 9  | 6 | 0 | 1.049511  | 1.429324  | 0.323258  |
| 10 | 6 | 0 | 2.304021  | 1.069700  | -0.163358 |
| 11 | 6 | 0 | 0.754880  | 2.774958  | 0.650874  |
| 12 | 1 | 0 | -0.224982 | 3.025096  | 1.049389  |
| 13 | 6 | 0 | 3.279741  | 2.095866  | -0.411643 |
| 14 | 6 | 0 | 2.971138  | 3.453122  | -0.059477 |
| 15 | 6 | 0 | 1.699402  | 3.757948  | 0.487919  |
| 16 | 6 | 0 | 3.934220  | 4.472152  | -0.291296 |
| 17 | 6 | 0 | 1.919380  | -2.358067 | -1.744560 |
| 18 | 6 | 0 | 3.640000  | -1.108218 | 0.115628  |
| 19 | 6 | 0 | 2.988886  | -3.059045 | -1.244594 |
| 20 | 6 | 0 | 3.859139  | -2.467633 | -0.291302 |
| 21 | 1 | 0 | 1.241665  | -2.828846 | -2.452576 |
| 22 | 6 | 0 | 4.926976  | -3.205086 | 0.287669  |
| 23 | 6 | 0 | -1.830443 | -0.242143 | -1.110158 |
| 24 | 1 | 0 | -2.025556 | -0.468100 | -2.156986 |
| 25 | 6 | 0 | 0.334599  | -0.724799 | 1.476973  |
| 26 | 8 | 0 | 0.941411  | -0.494711 | 2.493421  |
| 27 | 8 | 0 | -0.134360 | -1.938025 | 1.126037  |
| 28 | 6 | 0 | 0.250256  | -3.007443 | 2.023557  |
| 29 | 1 | 0 | -0.165409 | -2.836634 | 3.019059  |
| 30 | 1 | 0 | -0.154156 | -3.918747 | 1.582574  |
| 31 | 1 | 0 | 1.338082  | -3.064624 | 2.089398  |
| 32 | 6 | 0 | -2.932147 | -0.116492 | -0.266661 |
| 33 | 6 | 0 | -4.276480 | 0.023999  | -0.786994 |
| 34 | 6 | 0 | -3.197406 | -2.821350 | -0.124322 |
| 35 | 1 | 0 | -2.772306 | 0.039106  | 0.793381  |
| 36 | 6 | 0 | -5.126813 | -1.654821 | -0.704883 |
| 37 | 1 | 0 | -4.301444 | 0.210818  | -1.859183 |
| 38 | 6 | 0 | -4.452783 | -2.305377 | 0.499210  |
| 39 | 6 | 0 | -3.412467 | -2.999830 | -1.486636 |
| 40 | 1 | 0 | -2.323943 | -3.145917 | 0.426534  |
| 41 | 6 | 0 | -4.613758 | -2.369786 | -1.831726 |
| 42 | 1 | 0 | -6.181169 | -1.396487 | -0.667396 |
| 43 | 1 | 0 | -5.067396 | -3.171873 | 0.796036  |
| 44 | 1 | 0 | -4.328102 | -1.682462 | 1.384477  |
| 45 | 6 | 0 | -5.236944 | 0.937879  | -0.076729 |
| 46 | 6 | 0 | -6.173770 | 1.648284  | -0.843540 |

|    |   |   |           |           |           |
|----|---|---|-----------|-----------|-----------|
| 47 | 6 | 0 | -5.251323 | 1.100727  | 1.317372  |
| 48 | 6 | 0 | -7.093221 | 2.504046  | -0.238566 |
| 49 | 1 | 0 | -6.177463 | 1.536291  | -1.925584 |
| 50 | 6 | 0 | -6.172426 | 1.953861  | 1.923269  |
| 51 | 1 | 0 | -4.539738 | 0.571931  | 1.945780  |
| 52 | 6 | 0 | -7.096406 | 2.658406  | 1.148372  |
| 53 | 1 | 0 | -7.803843 | 3.050747  | -0.851375 |
| 54 | 1 | 0 | -6.165629 | 2.070995  | 3.003028  |
| 55 | 1 | 0 | -7.811395 | 3.323734  | 1.622895  |
| 56 | 1 | 0 | -5.034953 | -2.328608 | -2.831458 |
| 57 | 1 | 0 | -2.736777 | -3.496279 | -2.174016 |
| 58 | 1 | 0 | 1.474433  | 4.786021  | 0.758470  |
| 59 | 1 | 0 | 3.170007  | -4.084333 | -1.556714 |
| 60 | 6 | 0 | 5.143951  | 4.179483  | -0.875118 |
| 61 | 6 | 0 | 4.532431  | 1.836599  | -1.036723 |
| 62 | 1 | 0 | 4.773527  | 0.826628  | -1.346676 |
| 63 | 6 | 0 | 5.436979  | 2.849735  | -1.261300 |
| 64 | 1 | 0 | 3.689833  | 5.492305  | -0.006827 |
| 65 | 1 | 0 | 5.871400  | 4.966214  | -1.051990 |
| 66 | 1 | 0 | 6.384513  | 2.627301  | -1.743446 |
| 67 | 6 | 0 | 4.471612  | -0.570982 | 1.136947  |
| 68 | 1 | 0 | 4.290738  | 0.436668  | 1.491735  |
| 69 | 6 | 0 | 5.728943  | -2.643204 | 1.253646  |
| 70 | 6 | 0 | 5.487130  | -1.318857 | 1.689756  |
| 71 | 1 | 0 | 6.105435  | -0.890228 | 2.473018  |
| 72 | 1 | 0 | 5.091891  | -4.227844 | -0.041668 |
| 73 | 1 | 0 | 6.539894  | -3.216792 | 1.692846  |

**z-endo-re-b**

---

|    |   |   |           |           |           |
|----|---|---|-----------|-----------|-----------|
| 1  | 6 | 0 | 2.489945  | -0.433869 | -0.553341 |
| 2  | 6 | 0 | 1.589913  | -1.015711 | -1.443101 |
| 3  | 6 | 0 | -0.077811 | 0.565693  | 0.355465  |
| 4  | 6 | 0 | 0.454552  | -0.185690 | -1.995737 |
| 5  | 1 | 0 | -0.890927 | 1.157514  | 0.789798  |
| 6  | 1 | 0 | 0.812536  | 0.778082  | -2.371750 |
| 7  | 1 | 0 | -0.043978 | -0.706852 | -2.815531 |
| 8  | 7 | 0 | -0.569403 | 0.074188  | -0.949096 |
| 9  | 6 | 0 | 1.115213  | 1.495835  | 0.196192  |
| 10 | 6 | 0 | 2.345243  | 1.023600  | -0.256442 |
| 11 | 6 | 0 | 0.930700  | 2.867879  | 0.496394  |
| 12 | 1 | 0 | -0.033796 | 3.208326  | 0.864564  |
| 13 | 6 | 0 | 3.409583  | 1.959145  | -0.499203 |
| 14 | 6 | 0 | 3.210836  | 3.343686  | -0.175243 |
| 15 | 6 | 0 | 1.958453  | 3.764534  | 0.339062  |
| 16 | 6 | 0 | 4.261764  | 4.272971  | -0.402490 |
| 17 | 6 | 0 | 1.694694  | -2.383730 | -1.792267 |
| 18 | 6 | 0 | 3.480409  | -1.257969 | 0.085239  |
| 19 | 6 | 0 | 2.681750  | -3.169541 | -1.251054 |
| 20 | 6 | 0 | 3.581169  | -2.640055 | -0.289253 |
| 21 | 1 | 0 | 0.993093  | -2.805614 | -2.507690 |

|    |   |   |           |           |           |
|----|---|---|-----------|-----------|-----------|
| 22 | 6 | 0 | 4.564359  | -3.460008 | 0.327635  |
| 23 | 6 | 0 | -1.863473 | -0.140827 | -1.197931 |
| 24 | 1 | 0 | -2.072635 | -0.398564 | -2.234477 |
| 25 | 6 | 0 | 0.124567  | -0.615468 | 1.333080  |
| 26 | 8 | 0 | -0.387987 | -1.706302 | 1.195873  |
| 27 | 8 | 0 | 0.849378  | -0.237618 | 2.385159  |
| 28 | 6 | 0 | 1.072673  | -1.244336 | 3.399011  |
| 29 | 1 | 0 | 1.649989  | -2.070387 | 2.978993  |
| 30 | 1 | 0 | 1.635131  | -0.740094 | 4.183341  |
| 31 | 1 | 0 | 0.119093  | -1.615937 | 3.780518  |
| 32 | 6 | 0 | -2.944963 | -0.032197 | -0.332411 |
| 33 | 6 | 0 | -4.309966 | 0.001222  | -0.814557 |
| 34 | 6 | 0 | -3.035034 | -2.787045 | -0.117387 |
| 35 | 1 | 0 | -2.763690 | 0.148133  | 0.719979  |
| 36 | 6 | 0 | -5.044076 | -1.728251 | -0.657921 |
| 37 | 1 | 0 | -4.378651 | 0.152892  | -1.890433 |
| 38 | 6 | 0 | -4.290488 | -2.310767 | 0.535154  |
| 39 | 6 | 0 | -3.284586 | -2.999268 | -1.468501 |
| 40 | 1 | 0 | -2.121550 | -3.029598 | 0.411337  |
| 41 | 6 | 0 | -4.528548 | -2.440040 | -1.785483 |
| 42 | 1 | 0 | -6.110908 | -1.535430 | -0.589435 |
| 43 | 1 | 0 | -4.850464 | -3.196137 | 0.880565  |
| 44 | 1 | 0 | -4.158851 | -1.659483 | 1.398700  |
| 45 | 6 | 0 | -5.309750 | 0.869300  | -0.101825 |
| 46 | 6 | 0 | -6.309017 | 1.499478  | -0.859584 |
| 47 | 6 | 0 | -5.300176 | 1.064924  | 1.288077  |
| 48 | 6 | 0 | -7.266009 | 2.310119  | -0.250561 |
| 49 | 1 | 0 | -6.332596 | 1.360126  | -1.938172 |
| 50 | 6 | 0 | -6.258585 | 1.872719  | 1.898273  |
| 51 | 1 | 0 | -4.541494 | 0.595469  | 1.908410  |
| 52 | 6 | 0 | -7.244617 | 2.498196  | 1.132012  |
| 53 | 1 | 0 | -8.025349 | 2.795238  | -0.856793 |
| 54 | 1 | 0 | -6.233247 | 2.015957  | 2.974664  |
| 55 | 1 | 0 | -7.988960 | 3.128094  | 1.609809  |
| 56 | 1 | 0 | -4.984213 | -2.444127 | -2.771043 |
| 57 | 1 | 0 | -2.606412 | -3.474271 | -2.168450 |
| 58 | 1 | 0 | 1.815209  | 4.813027  | 0.585947  |
| 59 | 1 | 0 | 2.772509  | -4.214321 | -1.536235 |
| 60 | 6 | 0 | 5.453755  | 3.868121  | -0.955136 |
| 61 | 6 | 0 | 4.647876  | 1.583237  | -1.092720 |
| 62 | 1 | 0 | 4.806964  | 0.551198  | -1.382081 |
| 63 | 6 | 0 | 5.640111  | 2.511611  | -1.313542 |
| 64 | 1 | 0 | 4.099293  | 5.315284  | -0.140655 |
| 65 | 1 | 0 | 6.248823  | 4.587063  | -1.129519 |
| 66 | 1 | 0 | 6.574537  | 2.201113  | -1.772012 |
| 67 | 6 | 0 | 4.343179  | -0.776592 | 1.109809  |
| 68 | 1 | 0 | 4.258701  | 0.254821  | 1.431753  |
| 69 | 6 | 0 | 5.398102  | -2.954247 | 1.297587  |
| 70 | 6 | 0 | 5.275121  | -1.602503 | 1.698491  |
| 71 | 1 | 0 | 5.922490  | -1.212972 | 2.478983  |
| 72 | 1 | 0 | 4.638564  | -4.500879 | 0.023304  |

|    |   |   |          |           |          |
|----|---|---|----------|-----------|----------|
| 73 | 1 | 0 | 6.144279 | -3.590566 | 1.764287 |
|----|---|---|----------|-----------|----------|

---

**e-endo-si-a**

|    |   |   |           |           |           |
|----|---|---|-----------|-----------|-----------|
| 1  | 6 | 0 | -2.338404 | -0.182443 | 0.589404  |
| 2  | 6 | 0 | -1.128760 | -0.527194 | 1.186877  |
| 3  | 6 | 0 | -0.413018 | 0.054698  | -1.553932 |
| 4  | 6 | 0 | 0.116572  | 0.283683  | 0.909924  |
| 5  | 1 | 0 | 0.114521  | 0.290395  | -2.484762 |
| 6  | 1 | 0 | -0.059213 | 1.354813  | 1.060923  |
| 7  | 1 | 0 | 0.910658  | -0.026658 | 1.588227  |
| 8  | 7 | 0 | 0.608754  | 0.100955  | -0.480798 |
| 9  | 6 | 0 | -1.476343 | 1.117987  | -1.343873 |
| 10 | 6 | 0 | -2.378889 | 1.026124  | -0.286971 |
| 11 | 6 | 0 | -1.492034 | 2.230981  | -2.218962 |
| 12 | 1 | 0 | -0.792466 | 2.266085  | -3.050407 |
| 13 | 6 | 0 | -3.276379 | 2.120466  | -0.035123 |
| 14 | 6 | 0 | -3.289691 | 3.235187  | -0.939768 |
| 15 | 6 | 0 | -2.393202 | 3.250827  | -2.038161 |
| 16 | 6 | 0 | -4.181144 | 4.316566  | -0.703945 |
| 17 | 6 | 0 | -1.041784 | -1.643189 | 2.056692  |
| 18 | 6 | 0 | -3.484742 | -1.029971 | 0.781226  |
| 19 | 6 | 0 | -2.146656 | -2.414166 | 2.320350  |
| 20 | 6 | 0 | -3.384459 | -2.144877 | 1.679650  |
| 21 | 1 | 0 | -0.092283 | -1.871585 | 2.535340  |
| 22 | 6 | 0 | -4.516848 | -2.976885 | 1.889720  |
| 23 | 6 | 0 | 1.902424  | 0.029090  | -0.789015 |
| 24 | 1 | 0 | 2.096141  | -0.049511 | -1.856727 |
| 25 | 6 | 0 | -0.997459 | -1.355852 | -1.793201 |
| 26 | 8 | 0 | -2.035623 | -1.539774 | -2.377264 |
| 27 | 8 | 0 | -0.167733 | -2.335994 | -1.379128 |
| 28 | 6 | 0 | -0.661866 | -3.675690 | -1.618929 |
| 29 | 1 | 0 | -1.606357 | -3.825009 | -1.092504 |
| 30 | 1 | 0 | -0.813777 | -3.838495 | -2.688100 |
| 31 | 1 | 0 | 0.105760  | -4.344278 | -1.229026 |
| 32 | 6 | 0 | 3.008631  | 0.066265  | 0.057010  |
| 33 | 6 | 0 | 3.140772  | -2.617140 | -0.057294 |
| 34 | 6 | 0 | 4.358840  | 0.200568  | -0.452044 |
| 35 | 1 | 0 | 2.857314  | 0.158478  | 1.125009  |
| 36 | 6 | 0 | 4.417324  | -2.236892 | 0.621291  |
| 37 | 6 | 0 | 3.365974  | -2.685958 | -1.429616 |
| 38 | 1 | 0 | 2.243948  | -2.955327 | 0.449167  |
| 39 | 6 | 0 | 5.132850  | -1.505197 | -0.512012 |
| 40 | 1 | 0 | 4.390699  | 0.479704  | -1.504050 |
| 41 | 1 | 0 | 4.982504  | -3.160802 | 0.829307  |
| 42 | 1 | 0 | 4.320078  | -1.699655 | 1.564428  |
| 43 | 6 | 0 | 4.602241  | -2.094264 | -1.704274 |
| 44 | 1 | 0 | 6.197928  | -1.303264 | -0.441517 |
| 45 | 1 | 0 | 5.037716  | -1.982879 | -2.692435 |
| 46 | 1 | 0 | 2.667269  | -3.070090 | -2.163352 |
| 47 | 6 | 0 | 5.350031  | 1.017713  | 0.331259  |



|    |   |   |           |           |           |
|----|---|---|-----------|-----------|-----------|
| 48 | 6 | 0 | 6.304762  | 1.765818  | -0.374737 |
| 49 | 6 | 0 | 5.374696  | 1.053856  | 1.734012  |
| 50 | 6 | 0 | 7.250762  | 2.537571  | 0.298606  |
| 51 | 1 | 0 | 6.301452  | 1.750896  | -1.462465 |
| 52 | 6 | 0 | 6.321949  | 1.823076  | 2.408186  |
| 53 | 1 | 0 | 4.650367  | 0.491278  | 2.316934  |
| 54 | 6 | 0 | 7.262998  | 2.567607  | 1.693665  |
| 55 | 1 | 0 | 7.974912  | 3.116183  | -0.267282 |
| 56 | 1 | 0 | 6.322256  | 1.843558  | 3.494103  |
| 57 | 1 | 0 | 7.998471  | 3.167389  | 2.221282  |
| 58 | 6 | 0 | -5.007717 | 4.322346  | 0.394649  |
| 59 | 6 | 0 | -4.129030 | 2.174376  | 1.103698  |
| 60 | 6 | 0 | -4.969038 | 3.244976  | 1.311646  |
| 61 | 1 | 0 | -4.187906 | 5.146667  | -1.405539 |
| 62 | 1 | 0 | -2.414069 | 4.093348  | -2.724047 |
| 63 | 1 | 0 | -5.681837 | 5.155873  | 0.568435  |
| 64 | 1 | 0 | -5.607029 | 3.265025  | 2.190477  |
| 65 | 1 | 0 | -4.110513 | 1.362572  | 1.821293  |
| 66 | 6 | 0 | -4.708263 | -0.842224 | 0.080805  |
| 67 | 6 | 0 | -5.694013 | -2.746933 | 1.216499  |
| 68 | 6 | 0 | -5.781669 | -1.678297 | 0.293377  |
| 69 | 1 | 0 | -4.788500 | -0.038314 | -0.640917 |
| 70 | 1 | 0 | -2.081856 | -3.253598 | 3.007831  |
| 71 | 1 | 0 | -4.430699 | -3.807648 | 2.585475  |
| 72 | 1 | 0 | -6.552749 | -3.391469 | 1.379764  |
| 73 | 1 | 0 | -6.703684 | -1.519860 | -0.258277 |

---

**e-endo-si-b**

---

|    |   |   |           |           |           |
|----|---|---|-----------|-----------|-----------|
| 1  | 6 | 0 | 2.197624  | -0.173203 | -0.686678 |
| 2  | 6 | 0 | 0.938014  | -0.339882 | -1.256686 |
| 3  | 6 | 0 | 0.393109  | 0.360900  | 1.511983  |
| 4  | 6 | 0 | -0.166848 | 0.640327  | -0.931173 |
| 5  | 1 | 0 | -0.073359 | 0.702310  | 2.443615  |
| 6  | 1 | 0 | 0.171641  | 1.676003  | -1.036849 |
| 7  | 1 | 0 | -1.011169 | 0.496582  | -1.602880 |
| 8  | 7 | 0 | -0.646188 | 0.464651  | 0.461964  |
| 9  | 6 | 0 | 1.577485  | 1.270082  | 1.237243  |
| 10 | 6 | 0 | 2.434126  | 1.031416  | 0.165141  |
| 11 | 6 | 0 | 1.768712  | 2.390039  | 2.083132  |
| 12 | 1 | 0 | 1.098508  | 2.543746  | 2.925141  |
| 13 | 6 | 0 | 3.469232  | 1.983871  | -0.131941 |
| 14 | 6 | 0 | 3.657799  | 3.105985  | 0.743542  |
| 15 | 6 | 0 | 2.796885  | 3.271391  | 1.857931  |
| 16 | 6 | 0 | 4.684837  | 4.047173  | 0.462701  |
| 17 | 6 | 0 | 0.665281  | -1.441450 | -2.104692 |
| 18 | 6 | 0 | 3.199332  | -1.186454 | -0.884193 |
| 19 | 6 | 0 | 1.632813  | -2.379632 | -2.366936 |
| 20 | 6 | 0 | 2.908648  | -2.292945 | -1.751191 |
| 21 | 1 | 0 | -0.316308 | -1.528064 | -2.564580 |
| 22 | 6 | 0 | 3.894805  | -3.294966 | -1.958497 |

|    |   |   |           |           |           |
|----|---|---|-----------|-----------|-----------|
| 23 | 6 | 0 | -1.925702 | 0.262996  | 0.788449  |
| 24 | 1 | 0 | -2.090489 | 0.162556  | 1.858996  |
| 25 | 6 | 0 | 0.728187  | -1.129665 | 1.770317  |
| 26 | 8 | 0 | -0.017486 | -2.044477 | 1.486814  |
| 27 | 8 | 0 | 1.874954  | -1.252790 | 2.434565  |
| 28 | 6 | 0 | 2.263158  | -2.599647 | 2.791449  |
| 29 | 1 | 0 | 1.493550  | -3.062240 | 3.413265  |
| 30 | 1 | 0 | 2.414580  | -3.192772 | 1.887500  |
| 31 | 1 | 0 | 3.195537  | -2.491398 | 3.343299  |
| 32 | 6 | 0 | -3.045622 | 0.211494  | -0.033101 |
| 33 | 6 | 0 | -2.940985 | -2.532830 | 0.154164  |
| 34 | 6 | 0 | -4.390770 | 0.225280  | 0.499368  |
| 35 | 1 | 0 | -2.925123 | 0.291940  | -1.106150 |
| 36 | 6 | 0 | -4.235671 | -2.249720 | -0.535697 |
| 37 | 6 | 0 | -3.158084 | -2.573604 | 1.525782  |
| 38 | 1 | 0 | -2.012990 | -2.805187 | -0.334574 |
| 39 | 6 | 0 | -5.015709 | -1.560935 | 0.581525  |
| 40 | 1 | 0 | -4.431292 | 0.501494  | 1.551588  |
| 41 | 1 | 0 | -4.733586 | -3.212561 | -0.739438 |
| 42 | 1 | 0 | -4.167284 | -1.718590 | -1.485047 |
| 43 | 6 | 0 | -4.439304 | -2.071754 | 1.785062  |
| 44 | 1 | 0 | -6.093113 | -1.446414 | 0.505595  |
| 45 | 1 | 0 | -4.884381 | -1.969967 | 2.770225  |
| 46 | 1 | 0 | -2.424020 | -2.880362 | 2.260047  |
| 47 | 6 | 0 | -5.470215 | 0.934878  | -0.268553 |
| 48 | 6 | 0 | -6.468191 | 1.611826  | 0.449404  |
| 49 | 6 | 0 | -5.535629 | 0.937437  | -1.670674 |
| 50 | 6 | 0 | -7.496056 | 2.282895  | -0.211802 |
| 51 | 1 | 0 | -6.434622 | 1.620659  | 1.536667  |
| 52 | 6 | 0 | -6.564330 | 1.605767  | -2.332519 |
| 53 | 1 | 0 | -4.781723 | 0.424152  | -2.261514 |
| 54 | 6 | 0 | -7.547995 | 2.280879  | -1.606233 |
| 55 | 1 | 0 | -8.253253 | 2.808056  | 0.362945  |
| 56 | 1 | 0 | -6.596171 | 1.601260  | -3.418189 |
| 57 | 1 | 0 | -8.347516 | 2.801727  | -2.124490 |
| 58 | 6 | 0 | 5.479407  | 3.912492  | -0.651115 |
| 59 | 6 | 0 | 4.295229  | 1.892167  | -1.287801 |
| 60 | 6 | 0 | 5.271396  | 2.829972  | -1.538887 |
| 61 | 1 | 0 | 4.821756  | 4.884798  | 1.141648  |
| 62 | 1 | 0 | 2.948008  | 4.120207  | 2.519360  |
| 63 | 1 | 0 | 6.258046  | 4.640207  | -0.859777 |
| 64 | 1 | 0 | 5.885685  | 2.741215  | -2.430257 |
| 65 | 1 | 0 | 4.145675  | 1.075284  | -1.983975 |
| 66 | 6 | 0 | 4.457135  | -1.169076 | -0.218632 |
| 67 | 6 | 0 | 5.109668  | -3.232934 | -1.316534 |
| 68 | 6 | 0 | 5.384920  | -2.165152 | -0.429411 |
| 69 | 1 | 0 | 4.681435  | -0.361917 | 0.468885  |
| 70 | 1 | 0 | 1.426740  | -3.212604 | -3.033925 |
| 71 | 1 | 0 | 3.665824  | -4.119470 | -2.628798 |
| 72 | 1 | 0 | 5.855122  | -4.005686 | -1.479767 |
| 73 | 1 | 0 | 6.337736  | -2.131884 | 0.091158  |

---

e-endo-re-a

---

|    |   |   |           |           |           |
|----|---|---|-----------|-----------|-----------|
| 1  | 6 | 0 | 2.323051  | -0.637917 | -0.442580 |
| 2  | 6 | 0 | 1.094584  | -1.113482 | -0.893322 |
| 3  | 6 | 0 | 0.429847  | 0.291329  | 1.535256  |
| 4  | 6 | 0 | -0.125853 | -0.221276 | -0.884573 |
| 5  | 1 | 0 | -0.075495 | 0.805683  | 2.359762  |
| 6  | 1 | 0 | 0.072036  | 0.729908  | -1.395353 |
| 7  | 1 | 0 | -0.942337 | -0.723481 | -1.404474 |
| 8  | 7 | 0 | -0.600596 | 0.092331  | 0.487421  |
| 9  | 6 | 0 | 1.534007  | 1.200933  | 1.028209  |
| 10 | 6 | 0 | 2.409989  | 0.774990  | 0.032443  |
| 11 | 6 | 0 | 1.604912  | 2.519256  | 1.541803  |
| 12 | 1 | 0 | 0.932343  | 2.814791  | 2.343867  |
| 13 | 6 | 0 | 3.331836  | 1.718245  | -0.539710 |
| 14 | 6 | 0 | 3.397982  | 3.047367  | -0.001079 |
| 15 | 6 | 0 | 2.530604  | 3.411616  | 1.060130  |
| 16 | 6 | 0 | 4.313804  | 3.981849  | -0.555600 |
| 17 | 6 | 0 | 0.961907  | -2.441036 | -1.372361 |
| 18 | 6 | 0 | 3.444908  | -1.535538 | -0.376782 |
| 19 | 6 | 0 | 2.042588  | -3.287059 | -1.396454 |
| 20 | 6 | 0 | 3.299815  | -2.868853 | -0.887485 |
| 21 | 1 | 0 | -0.004867 | -2.781991 | -1.733747 |
| 22 | 6 | 0 | 4.407293  | -3.757789 | -0.844537 |
| 23 | 6 | 0 | -1.884813 | 0.308335  | 0.760218  |
| 24 | 1 | 0 | -2.087053 | 0.511775  | 1.809995  |
| 25 | 6 | 0 | 0.930444  | -1.027661 | 2.165350  |
| 26 | 8 | 0 | 1.973963  | -1.108215 | 2.765149  |
| 27 | 8 | 0 | 0.014531  | -2.002341 | 2.061646  |
| 28 | 6 | 0 | 0.373926  | -3.253106 | 2.692931  |
| 29 | 1 | 0 | 0.546701  | -3.101351 | 3.760638  |
| 30 | 1 | 0 | -0.475401 | -3.914774 | 2.526217  |
| 31 | 1 | 0 | 1.277587  | -3.657088 | 2.232181  |
| 32 | 6 | 0 | -2.974229 | 0.285826  | -0.108607 |
| 33 | 6 | 0 | -4.335421 | 0.286553  | 0.390674  |
| 34 | 6 | 0 | -2.989612 | 2.983200  | -0.374965 |
| 35 | 1 | 0 | -2.810437 | 0.099854  | -1.162569 |
| 36 | 6 | 0 | -5.013874 | 2.018597  | 0.249647  |
| 37 | 1 | 0 | -4.389260 | 0.127148  | 1.466802  |
| 38 | 6 | 0 | -4.289067 | 2.561808  | -0.979512 |
| 39 | 6 | 0 | -3.185172 | 3.238096  | 0.979602  |
| 40 | 1 | 0 | -2.099276 | 3.232828  | -0.941667 |
| 41 | 6 | 0 | -4.437045 | 2.735662  | 1.347542  |
| 42 | 1 | 0 | -6.089051 | 1.865391  | 0.220420  |
| 43 | 1 | 0 | -4.822012 | 3.470203  | -1.306799 |
| 44 | 1 | 0 | -4.226152 | 1.898024  | -1.841421 |
| 45 | 1 | 0 | -2.466944 | 3.704190  | 1.644731  |
| 46 | 1 | 0 | -4.859635 | 2.776891  | 2.346602  |

|    |   |   |           |           |           |
|----|---|---|-----------|-----------|-----------|
| 47 | 6 | 0 | -5.367718 | -0.557898 | -0.308026 |
| 48 | 6 | 0 | -6.388643 | -1.134752 | 0.463267  |
| 49 | 6 | 0 | -5.367464 | -0.781987 | -1.693305 |
| 50 | 6 | 0 | -7.376867 | -1.920193 | -0.128341 |
| 51 | 1 | 0 | -6.405003 | -0.973280 | 1.538954  |
| 52 | 6 | 0 | -6.357086 | -1.565111 | -2.286314 |
| 53 | 1 | 0 | -4.590907 | -0.358438 | -2.324480 |
| 54 | 6 | 0 | -7.365094 | -2.136532 | -1.506964 |
| 55 | 1 | 0 | -8.152873 | -2.364025 | 0.488318  |
| 56 | 1 | 0 | -6.337793 | -1.732087 | -3.359355 |
| 57 | 1 | 0 | -8.133534 | -2.747289 | -1.971213 |
| 58 | 6 | 0 | 5.603113  | -3.366691 | -0.289114 |
| 59 | 6 | 0 | 4.686362  | -1.177974 | 0.218134  |
| 60 | 6 | 0 | 5.735038  | -2.069375 | 0.259822  |
| 61 | 1 | 0 | 6.671247  | -1.776392 | 0.725925  |
| 62 | 1 | 0 | 1.941451  | -4.297393 | -1.784045 |
| 63 | 1 | 0 | 4.286264  | -4.759747 | -1.248288 |
| 64 | 1 | 0 | 6.442288  | -4.055314 | -0.255741 |
| 65 | 1 | 0 | 4.800572  | -0.194866 | 0.658671  |
| 66 | 6 | 0 | 4.159696  | 1.407553  | -1.655523 |
| 67 | 6 | 0 | 5.114350  | 3.638256  | -1.619365 |
| 68 | 6 | 0 | 5.024578  | 2.341634  | -2.179684 |
| 69 | 1 | 0 | 2.597147  | 4.413932  | 1.474888  |
| 70 | 1 | 0 | 4.362319  | 4.979515  | -0.126858 |
| 71 | 1 | 0 | 5.808340  | 4.360903  | -2.038440 |
| 72 | 1 | 0 | 5.643509  | 2.081960  | -3.033656 |
| 73 | 1 | 0 | 4.102387  | 0.421411  | -2.101133 |

---

**e-endo-re-b**

---

|    |   |   |           |           |           |
|----|---|---|-----------|-----------|-----------|
| 1  | 6 | 0 | -2.151472 | 0.661228  | -0.484571 |
| 2  | 6 | 0 | -0.872417 | 0.876799  | -0.990722 |
| 3  | 6 | 0 | -0.455839 | -0.902720 | 1.272343  |
| 4  | 6 | 0 | 0.090504  | -0.283885 | -1.114362 |
| 5  | 1 | 0 | -0.047886 | -1.640521 | 1.972765  |
| 6  | 1 | 0 | -0.378974 | -1.147188 | -1.596704 |
| 7  | 1 | 0 | 0.955076  | 0.007821  | -1.707795 |
| 8  | 7 | 0 | 0.573785  | -0.716348 | 0.220315  |
| 9  | 6 | 0 | -1.747616 | -1.473262 | 0.718436  |
| 10 | 6 | 0 | -2.551834 | -0.737610 | -0.149291 |
| 11 | 6 | 0 | -2.100410 | -2.795606 | 1.085907  |
| 12 | 1 | 0 | -1.470684 | -3.340094 | 1.785398  |
| 13 | 6 | 0 | -3.698352 | -1.366668 | -0.746789 |
| 14 | 6 | 0 | -4.048062 | -2.702319 | -0.353589 |
| 15 | 6 | 0 | -3.234318 | -3.385670 | 0.585291  |
| 16 | 6 | 0 | -5.185737 | -3.326908 | -0.932517 |
| 17 | 6 | 0 | -0.441784 | 2.176882  | -1.351533 |
| 18 | 6 | 0 | -3.012850 | 1.787639  | -0.244949 |
| 19 | 6 | 0 | -1.277905 | 3.255044  | -1.201577 |
| 20 | 6 | 0 | -2.567610 | 3.096534  | -0.630741 |
| 21 | 1 | 0 | 0.557530  | 2.314679  | -1.755913 |

|    |   |   |           |           |           |
|----|---|---|-----------|-----------|-----------|
| 22 | 6 | 0 | -3.415128 | 4.215427  | -0.408600 |
| 23 | 6 | 0 | 1.859445  | -0.752084 | 0.565756  |
| 24 | 1 | 0 | 2.024703  | -0.965128 | 1.619004  |
| 25 | 6 | 0 | -0.566028 | 0.399024  | 2.110682  |
| 26 | 8 | 0 | 0.342131  | 1.192719  | 2.213448  |
| 27 | 8 | 0 | -1.721405 | 0.449197  | 2.771692  |
| 28 | 6 | 0 | -1.894291 | 1.584764  | 3.651956  |
| 29 | 1 | 0 | -1.890941 | 2.508729  | 3.070403  |
| 30 | 1 | 0 | -2.861149 | 1.431845  | 4.128991  |
| 31 | 1 | 0 | -1.092153 | 1.612744  | 4.392516  |
| 32 | 6 | 0 | 2.989649  | -0.547147 | -0.224969 |
| 33 | 6 | 0 | 4.294554  | -0.346364 | 0.371817  |
| 34 | 6 | 0 | 3.441250  | -3.192503 | -0.514165 |
| 35 | 1 | 0 | 2.872008  | -0.340729 | -1.281477 |
| 36 | 6 | 0 | 5.253799  | -1.949666 | 0.248440  |
| 37 | 1 | 0 | 4.248639  | -0.210613 | 1.451125  |
| 38 | 6 | 0 | 4.696520  | -2.567841 | -1.030499 |
| 39 | 6 | 0 | 3.594441  | -3.448615 | 0.845551  |
| 40 | 1 | 0 | 2.635891  | -3.561384 | -1.139795 |
| 41 | 6 | 0 | 4.730300  | -2.769590 | 1.298158  |
| 42 | 1 | 0 | 6.289969  | -1.625888 | 0.288768  |
| 43 | 1 | 0 | 5.379859  | -3.378223 | -1.335054 |
| 44 | 1 | 0 | 4.586475  | -1.901695 | -1.885740 |
| 45 | 1 | 0 | 2.918196  | -4.033273 | 1.459166  |
| 46 | 1 | 0 | 5.092048  | -2.766498 | 2.321592  |
| 47 | 6 | 0 | 5.223816  | 0.668595  | -0.237974 |
| 48 | 6 | 0 | 6.063709  | 1.400071  | 0.615937  |
| 49 | 6 | 0 | 5.302487  | 0.906712  | -1.618797 |
| 50 | 6 | 0 | 6.951104  | 2.348263  | 0.108708  |
| 51 | 1 | 0 | 6.014908  | 1.232136  | 1.689516  |
| 52 | 6 | 0 | 6.191963  | 1.852280  | -2.127268 |
| 53 | 1 | 0 | 4.665306  | 0.365473  | -2.313045 |
| 54 | 6 | 0 | 7.019625  | 2.576122  | -1.266303 |
| 55 | 1 | 0 | 7.585449  | 2.909478  | 0.788477  |
| 56 | 1 | 0 | 6.235630  | 2.026136  | -3.198553 |
| 57 | 1 | 0 | 7.710168  | 3.313196  | -1.665017 |
| 58 | 6 | 0 | -4.640473 | 4.063545  | 0.197257  |
| 59 | 6 | 0 | -4.274992 | 1.673004  | 0.402539  |
| 60 | 6 | 0 | -5.065511 | 2.780399  | 0.616538  |
| 61 | 1 | 0 | -6.024446 | 2.668714  | 1.114532  |
| 62 | 1 | 0 | -0.951101 | 4.249136  | -1.494652 |
| 63 | 1 | 0 | -3.069685 | 5.198425  | -0.718168 |
| 64 | 1 | 0 | -5.278781 | 4.925981  | 0.365385  |
| 65 | 1 | 0 | -4.612193 | 0.699192  | 0.737774  |
| 66 | 6 | 0 | -4.485089 | -0.739459 | -1.754102 |
| 67 | 6 | 0 | -5.936048 | -2.680226 | -1.886023 |
| 68 | 6 | 0 | -5.571384 | -1.379170 | -2.307325 |
| 69 | 1 | 0 | -3.508510 | -4.393315 | 0.885933  |
| 70 | 1 | 0 | -5.444344 | -4.333537 | -0.614269 |
| 71 | 1 | 0 | -6.800615 | -3.168185 | -2.326319 |
| 72 | 1 | 0 | -6.152938 | -0.882060 | -3.078324 |

73 1 0 -4.217849 0.253626 -2.095742

---

**e-exo-si-a**

---

|    |   |   |           |           |           |
|----|---|---|-----------|-----------|-----------|
| 1  | 6 | 0 | 2.352698  | -0.233326 | -0.537144 |
| 2  | 6 | 0 | 1.136058  | -0.621415 | -1.092229 |
| 3  | 6 | 0 | 0.445105  | 0.246060  | 1.580099  |
| 4  | 6 | 0 | -0.098133 | 0.229768  | -0.892764 |
| 5  | 1 | 0 | -0.077355 | 0.589336  | 2.479710  |
| 6  | 1 | 0 | 0.089329  | 1.278962  | -1.147197 |
| 7  | 1 | 0 | -0.901780 | -0.136390 | -1.531334 |
| 8  | 7 | 0 | -0.580743 | 0.180239  | 0.510825  |
| 9  | 6 | 0 | 1.515211  | 1.271464  | 1.251871  |
| 10 | 6 | 0 | 2.411385  | 1.060027  | 0.207244  |
| 11 | 6 | 0 | 1.545033  | 2.471594  | 2.002897  |
| 12 | 1 | 0 | 0.850167  | 2.602482  | 2.828644  |
| 13 | 6 | 0 | 3.317952  | 2.112083  | -0.163254 |
| 14 | 6 | 0 | 3.344412  | 3.317520  | 0.616091  |
| 15 | 6 | 0 | 2.453145  | 3.458644  | 1.709771  |
| 16 | 6 | 0 | 4.244008  | 4.359102  | 0.262060  |
| 17 | 6 | 0 | 1.029333  | -1.824666 | -1.834638 |
| 18 | 6 | 0 | 3.485538  | -1.113508 | -0.637247 |
| 19 | 6 | 0 | 2.121083  | -2.638059 | -2.011803 |
| 20 | 6 | 0 | 3.364598  | -2.320201 | -1.405342 |
| 21 | 1 | 0 | 0.074944  | -2.088387 | -2.284468 |
| 22 | 6 | 0 | 4.482167  | -3.189830 | -1.520810 |
| 23 | 6 | 0 | 1.014849  | -1.135104 | 1.975296  |
| 24 | 8 | 0 | 2.063677  | -1.268449 | 2.553937  |
| 25 | 8 | 0 | 0.154725  | -2.139579 | 1.706880  |
| 26 | 6 | 0 | 0.617730  | -3.447780 | 2.119338  |
| 27 | 1 | 0 | -0.187350 | -4.136952 | 1.864162  |
| 28 | 1 | 0 | 1.532215  | -3.705330 | 1.581453  |
| 29 | 1 | 0 | 0.812612  | -3.460139 | 3.193610  |
| 30 | 6 | 0 | -2.983895 | 0.099910  | -0.003877 |
| 31 | 6 | 0 | -4.318422 | 0.143564  | 0.534511  |
| 32 | 6 | 0 | -3.024252 | -2.684400 | -0.060060 |
| 33 | 1 | 0 | -2.851718 | 0.212332  | -1.072447 |
| 34 | 6 | 0 | -5.013548 | -1.640954 | 0.575071  |
| 35 | 1 | 0 | -4.332280 | 0.275487  | 1.618039  |
| 36 | 6 | 0 | -3.837823 | -2.413019 | 1.163618  |
| 37 | 6 | 0 | -3.846488 | -2.613025 | -1.171969 |
| 38 | 1 | 0 | -1.991645 | -3.014188 | -0.044983 |
| 39 | 6 | 0 | -5.080526 | -2.061604 | -0.782589 |
| 40 | 1 | 0 | -5.928269 | -1.501340 | 1.145581  |
| 41 | 1 | 0 | -4.230316 | -3.374110 | 1.535653  |
| 42 | 1 | 0 | -3.302724 | -1.943594 | 1.989847  |
| 43 | 6 | 0 | -1.871414 | 0.104360  | 0.832388  |
| 44 | 1 | 0 | -2.051591 | 0.067220  | 1.905045  |
| 45 | 1 | 0 | -3.572215 | -2.888941 | -2.183983 |
| 46 | 1 | 0 | -5.919596 | -1.878407 | -1.444345 |

|    |   |   |           |           |           |
|----|---|---|-----------|-----------|-----------|
| 47 | 6 | 0 | -5.374369 | 0.979468  | -0.122069 |
| 48 | 6 | 0 | -6.329700 | 1.610703  | 0.688091  |
| 49 | 6 | 0 | -5.448866 | 1.158383  | -1.512201 |
| 50 | 6 | 0 | -7.329541 | 2.406778  | 0.128264  |
| 51 | 1 | 0 | -6.286344 | 1.485135  | 1.767912  |
| 52 | 6 | 0 | -6.447255 | 1.952401  | -2.072501 |
| 53 | 1 | 0 | -4.727083 | 0.678854  | -2.168511 |
| 54 | 6 | 0 | -7.391191 | 2.579700  | -1.254171 |
| 55 | 1 | 0 | -8.056623 | 2.891305  | 0.773191  |
| 56 | 1 | 0 | -6.487892 | 2.084722  | -3.149812 |
| 57 | 1 | 0 | -8.167800 | 3.198431  | -1.693646 |
| 58 | 6 | 0 | 4.167033  | 2.034509  | -1.303350 |
| 59 | 6 | 0 | 5.066527  | 4.238674  | -0.832950 |
| 60 | 6 | 0 | 5.015738  | 3.068638  | -1.627818 |
| 61 | 1 | 0 | 2.484215  | 4.369747  | 2.301097  |
| 62 | 1 | 0 | 4.137961  | 1.149683  | -1.928337 |
| 63 | 1 | 0 | 5.651093  | 2.987723  | -2.505070 |
| 64 | 1 | 0 | 5.747171  | 5.042430  | -1.097714 |
| 65 | 1 | 0 | 4.260881  | 5.259953  | 0.869913  |
| 66 | 6 | 0 | 5.664240  | -2.906125 | -0.877376 |
| 67 | 6 | 0 | 4.713962  | -0.868470 | 0.036252  |
| 68 | 6 | 0 | 5.772418  | -1.741415 | -0.081246 |
| 69 | 1 | 0 | 2.041217  | -3.547121 | -2.602326 |
| 70 | 1 | 0 | 4.380589  | -4.091508 | -2.119404 |
| 71 | 1 | 0 | 6.511428  | -3.579757 | -0.966869 |
| 72 | 1 | 0 | 6.698421  | -1.537575 | 0.448384  |
| 73 | 1 | 0 | 4.809515  | 0.009812  | 0.663163  |

---

**e-exo-si-b**

---

|    |   |   |           |           |           |
|----|---|---|-----------|-----------|-----------|
| 1  | 6 | 0 | 2.177444  | -0.244709 | -0.629210 |
| 2  | 6 | 0 | 0.908830  | -0.403694 | -1.181160 |
| 3  | 6 | 0 | 0.428033  | 0.688975  | 1.482739  |
| 4  | 6 | 0 | -0.132591 | 0.674522  | -0.977565 |
| 5  | 1 | 0 | -0.017455 | 1.191348  | 2.349856  |
| 6  | 1 | 0 | 0.268880  | 1.668236  | -1.198385 |
| 7  | 1 | 0 | -0.989371 | 0.510367  | -1.628644 |
| 8  | 7 | 0 | -0.610191 | 0.682929  | 0.425483  |
| 9  | 6 | 0 | 1.659673  | 1.479864  | 1.083613  |
| 10 | 6 | 0 | 2.494019  | 1.044265  | 0.056258  |
| 11 | 6 | 0 | 1.926683  | 2.689224  | 1.771069  |
| 12 | 1 | 0 | 1.271233  | 2.997458  | 2.581715  |
| 13 | 6 | 0 | 3.585936  | 1.879696  | -0.363403 |
| 14 | 6 | 0 | 3.851226  | 3.094828  | 0.353678  |
| 15 | 6 | 0 | 3.008423  | 3.463910  | 1.432412  |
| 16 | 6 | 0 | 4.935188  | 3.921603  | -0.047869 |
| 17 | 6 | 0 | 0.567112  | -1.584774 | -1.885239 |
| 18 | 6 | 0 | 3.113202  | -1.335313 | -0.689278 |
| 19 | 6 | 0 | 1.474241  | -2.607087 | -2.020071 |
| 20 | 6 | 0 | 2.753166  | -2.523175 | -1.410086 |

|    |   |   |           |           |           |
|----|---|---|-----------|-----------|-----------|
| 21 | 1 | 0 | -0.418326 | -1.665697 | -2.337455 |
| 22 | 6 | 0 | 3.674320  | -3.603075 | -1.480721 |
| 23 | 6 | 0 | 0.682159  | -0.761793 | 1.968897  |
| 24 | 8 | 0 | -0.131422 | -1.656585 | 1.856958  |
| 25 | 8 | 0 | 1.840004  | -0.857623 | 2.615679  |
| 26 | 6 | 0 | 2.147274  | -2.150984 | 3.187075  |
| 27 | 1 | 0 | 3.101287  | -2.018891 | 3.694933  |
| 28 | 1 | 0 | 1.367184  | -2.446168 | 3.892093  |
| 29 | 1 | 0 | 2.230985  | -2.896173 | 2.393630  |
| 30 | 6 | 0 | -3.007934 | 0.312163  | -0.014770 |
| 31 | 6 | 0 | -4.324031 | 0.255185  | 0.567038  |
| 32 | 6 | 0 | -2.772268 | -2.533608 | 0.202783  |
| 33 | 1 | 0 | -2.918733 | 0.332654  | -1.093764 |
| 34 | 6 | 0 | -4.829752 | -1.583612 | 0.784457  |
| 35 | 1 | 0 | -4.322052 | 0.474966  | 1.636038  |
| 36 | 6 | 0 | -3.578680 | -2.190522 | 1.409970  |
| 37 | 6 | 0 | -3.612626 | -2.618896 | -0.893338 |
| 38 | 1 | 0 | -1.716182 | -2.773557 | 0.236317  |
| 39 | 6 | 0 | -4.880259 | -2.128034 | -0.528258 |
| 40 | 1 | 0 | -5.745045 | -1.476354 | 1.361180  |
| 41 | 1 | 0 | -3.880023 | -3.133480 | 1.896544  |
| 42 | 1 | 0 | -3.054053 | -1.601093 | 2.161782  |
| 43 | 6 | 0 | -1.882518 | 0.474653  | 0.780370  |
| 44 | 1 | 0 | -2.032329 | 0.474809  | 1.857495  |
| 45 | 1 | 0 | -3.335238 | -2.967484 | -1.881820 |
| 46 | 1 | 0 | -5.741703 | -2.073064 | -1.184580 |
| 47 | 6 | 0 | -5.481941 | 0.916771  | -0.115616 |
| 48 | 6 | 0 | -6.465699 | 1.530602  | 0.673649  |
| 49 | 6 | 0 | -5.622561 | 0.953338  | -1.511758 |
| 50 | 6 | 0 | -7.556431 | 2.173349  | 0.087000  |
| 51 | 1 | 0 | -6.372875 | 1.513639  | 1.757491  |
| 52 | 6 | 0 | -6.711822 | 1.593372  | -2.098876 |
| 53 | 1 | 0 | -4.881631 | 0.480292  | -2.151380 |
| 54 | 6 | 0 | -7.682594 | 2.206540  | -1.301412 |
| 55 | 1 | 0 | -8.304120 | 2.647827  | 0.715688  |
| 56 | 1 | 0 | -6.803183 | 1.616173  | -3.180989 |
| 57 | 1 | 0 | -8.530312 | 2.705220  | -1.761672 |
| 58 | 6 | 0 | 4.397778  | 1.580976  | -1.494280 |
| 59 | 6 | 0 | 5.713094  | 3.587765  | -1.131189 |
| 60 | 6 | 0 | 5.430634  | 2.411687  | -1.866192 |
| 61 | 1 | 0 | 3.216462  | 4.382865  | 1.973651  |
| 62 | 1 | 0 | 4.193661  | 0.689924  | -2.076361 |
| 63 | 1 | 0 | 6.032682  | 2.164769  | -2.735893 |
| 64 | 1 | 0 | 6.535592  | 4.229280  | -1.433435 |
| 65 | 1 | 0 | 5.129374  | 4.832346  | 0.512627  |
| 66 | 6 | 0 | 4.890938  | -3.535402 | -0.842669 |
| 67 | 6 | 0 | 4.370274  | -1.311114 | -0.022552 |
| 68 | 6 | 0 | 5.233442  | -2.381917 | -0.097601 |
| 69 | 1 | 0 | 1.217220  | -3.502578 | -2.579949 |
| 70 | 1 | 0 | 3.393807  | -4.490481 | -2.042351 |
| 71 | 1 | 0 | 5.586279  | -4.367687 | -0.900004 |



|    |   |   |          |           |          |
|----|---|---|----------|-----------|----------|
| 72 | 1 | 0 | 6.186962 | -2.341806 | 0.421216 |
| 73 | 1 | 0 | 4.645394 | -0.437966 | 0.557574 |

---

**e-exo-re-a**

---

|    |   |   |           |           |           |
|----|---|---|-----------|-----------|-----------|
| 1  | 6 | 0 | 2.333624  | -0.599136 | -0.463990 |
| 2  | 6 | 0 | 1.097078  | -1.022730 | -0.943904 |
| 3  | 6 | 0 | 0.463525  | 0.200213  | 1.591712  |
| 4  | 6 | 0 | -0.112402 | -0.119469 | -0.856083 |
| 5  | 1 | 0 | -0.030926 | 0.660863  | 2.453748  |
| 6  | 1 | 0 | 0.093543  | 0.868227  | -1.287820 |
| 7  | 1 | 0 | -0.936766 | -0.567909 | -1.411075 |
| 8  | 7 | 0 | -0.575456 | 0.083633  | 0.540150  |
| 9  | 6 | 0 | 1.572435  | 1.134660  | 1.142538  |
| 10 | 6 | 0 | 2.440242  | 0.773038  | 0.115051  |
| 11 | 6 | 0 | 1.656570  | 2.412604  | 1.748140  |
| 12 | 1 | 0 | 0.989209  | 2.656613  | 2.571469  |
| 13 | 6 | 0 | 3.370526  | 1.745718  | -0.390850 |
| 14 | 6 | 0 | 3.450595  | 3.032430  | 0.240926  |
| 15 | 6 | 0 | 2.588685  | 3.328710  | 1.327314  |
| 16 | 6 | 0 | 4.375088  | 3.994951  | -0.247385 |
| 17 | 6 | 0 | 0.945340  | -2.307315 | -1.523652 |
| 18 | 6 | 0 | 3.443608  | -1.513532 | -0.472705 |
| 19 | 6 | 0 | 2.014646  | -3.162799 | -1.618178 |
| 20 | 6 | 0 | 3.278900  | -2.801743 | -1.083607 |
| 21 | 1 | 0 | -0.027116 | -2.606606 | -1.906140 |
| 22 | 6 | 0 | 4.374269  | -3.706109 | -1.113372 |
| 23 | 6 | 0 | 0.958290  | -1.163462 | 2.123840  |
| 24 | 8 | 0 | 2.002880  | -1.293264 | 2.713126  |
| 25 | 8 | 0 | 0.037885  | -2.123870 | 1.950108  |
| 26 | 6 | 0 | 0.395455  | -3.420796 | 2.481217  |
| 27 | 1 | 0 | 0.575368  | -3.352701 | 3.556311  |
| 28 | 1 | 0 | -0.457598 | -4.064489 | 2.269215  |
| 29 | 1 | 0 | 1.294673  | -3.791047 | 1.984724  |
| 30 | 6 | 0 | -2.958742 | 0.294486  | -0.008578 |
| 31 | 6 | 0 | -2.958011 | 3.120520  | -0.148940 |
| 32 | 6 | 0 | -4.302659 | 0.302394  | 0.507705  |
| 33 | 1 | 0 | -2.811369 | 0.174694  | -1.074563 |
| 34 | 6 | 0 | -3.795152 | 2.877007  | 1.064718  |
| 35 | 6 | 0 | -3.753490 | 3.012192  | -1.275815 |
| 36 | 1 | 0 | -1.932824 | 3.473560  | -0.125307 |
| 37 | 6 | 0 | -4.964030 | 2.097269  | 0.474073  |
| 38 | 1 | 0 | -4.336546 | 0.205185  | 1.594505  |
| 39 | 1 | 0 | -4.187866 | 3.847567  | 1.411029  |
| 40 | 1 | 0 | -3.280468 | 2.421556  | 1.912092  |
| 41 | 6 | 0 | -4.997576 | 2.474399  | -0.897119 |
| 42 | 1 | 0 | -5.892352 | 1.986181  | 1.028583  |
| 43 | 6 | 0 | -1.859629 | 0.265513  | 0.844855  |
| 44 | 1 | 0 | -2.046676 | 0.379478  | 1.911129  |
| 45 | 1 | 0 | -3.456356 | 3.260515  | -2.288384 |

|    |   |   |           |           |           |
|----|---|---|-----------|-----------|-----------|
| 46 | 1 | 0 | -5.822715 | 2.274650  | -1.571440 |
| 47 | 6 | 0 | -5.367688 | -0.531574 | -0.138334 |
| 48 | 6 | 0 | -6.347046 | -1.117211 | 0.677254  |
| 49 | 6 | 0 | -5.426848 | -0.752140 | -1.523145 |
| 50 | 6 | 0 | -7.355923 | -1.909267 | 0.127852  |
| 51 | 1 | 0 | -6.315866 | -0.958817 | 1.753151  |
| 52 | 6 | 0 | -6.434713 | -1.541392 | -2.073125 |
| 53 | 1 | 0 | -4.685940 | -0.308146 | -2.183155 |
| 54 | 6 | 0 | -7.402853 | -2.123191 | -1.249395 |
| 55 | 1 | 0 | -8.102018 | -2.358042 | 0.776929  |
| 56 | 1 | 0 | -6.464164 | -1.705297 | -3.146465 |
| 57 | 1 | 0 | -8.186999 | -2.738153 | -1.680707 |
| 58 | 6 | 0 | 5.171213  | 3.720075  | -1.334126 |
| 59 | 6 | 0 | 4.193838  | 1.507418  | -1.527604 |
| 60 | 6 | 0 | 5.067816  | 2.467672  | -1.985209 |
| 61 | 1 | 0 | 2.665416  | 4.298432  | 1.811901  |
| 62 | 1 | 0 | 4.434279  | 4.958846  | 0.251580  |
| 63 | 1 | 0 | 5.872243  | 4.463749  | -1.701522 |
| 64 | 1 | 0 | 5.683447  | 2.263182  | -2.856381 |
| 65 | 1 | 0 | 4.125979  | 0.556374  | -2.042538 |
| 66 | 6 | 0 | 5.576753  | -3.375115 | -0.533877 |
| 67 | 6 | 0 | 4.691635  | -1.219447 | 0.143029  |
| 68 | 6 | 0 | 5.728030  | -2.125511 | 0.112288  |
| 69 | 1 | 0 | 1.898854  | -4.138536 | -2.082701 |
| 70 | 1 | 0 | 4.238451  | -4.672219 | -1.592736 |
| 71 | 1 | 0 | 6.406492  | -4.075504 | -0.556658 |
| 72 | 1 | 0 | 6.669451  | -1.881793 | 0.595927  |
| 73 | 1 | 0 | 4.820828  | -0.274745 | 0.657253  |

---

**e-exo-re-b**

---

|    |   |   |           |           |           |
|----|---|---|-----------|-----------|-----------|
| 1  | 6 | 0 | -2.166137 | 0.600447  | -0.529424 |
| 2  | 6 | 0 | -0.882378 | 0.760118  | -1.044816 |
| 3  | 6 | 0 | -0.488295 | -0.763839 | 1.401558  |
| 4  | 6 | 0 | 0.079554  | -0.407605 | -1.032995 |
| 5  | 1 | 0 | -0.087309 | -1.419994 | 2.182817  |
| 6  | 1 | 0 | -0.388467 | -1.317514 | -1.422254 |
| 7  | 1 | 0 | 0.949572  | -0.185010 | -1.647905 |
| 8  | 7 | 0 | 0.550150  | -0.694336 | 0.344380  |
| 9  | 6 | 0 | -1.775028 | -1.392064 | 0.900554  |
| 10 | 6 | 0 | -2.571020 | -0.754395 | -0.048533 |
| 11 | 6 | 0 | -2.130891 | -2.668006 | 1.404003  |
| 12 | 1 | 0 | -1.507745 | -3.133848 | 2.163612  |
| 13 | 6 | 0 | -3.713092 | -1.444293 | -0.584203 |
| 14 | 6 | 0 | -4.065693 | -2.731104 | -0.054260 |
| 15 | 6 | 0 | -3.259577 | -3.309956 | 0.958511  |
| 16 | 6 | 0 | -5.199298 | -3.414128 | -0.571949 |
| 17 | 6 | 0 | -0.447200 | 2.014270  | -1.538326 |
| 18 | 6 | 0 | -3.027087 | 1.746720  | -0.416976 |
| 19 | 6 | 0 | -1.282330 | 3.103316  | -1.508954 |
| 20 | 6 | 0 | -2.576209 | 3.007461  | -0.933915 |

|    |   |   |           |           |           |
|----|---|---|-----------|-----------|-----------|
| 21 | 1 | 0 | 0.555532  | 2.107655  | -1.946991 |
| 22 | 6 | 0 | -3.422556 | 4.144903  | -0.835657 |
| 23 | 6 | 0 | -0.606588 | 0.622083  | 2.089939  |
| 24 | 8 | 0 | 0.299183  | 1.424715  | 2.109652  |
| 25 | 8 | 0 | -1.766919 | 0.742559  | 2.733260  |
| 26 | 6 | 0 | -1.948541 | 1.970004  | 3.477823  |
| 27 | 1 | 0 | -1.927688 | 2.823135  | 2.796951  |
| 28 | 1 | 0 | -2.925117 | 1.875749  | 3.950211  |
| 29 | 1 | 0 | -1.160264 | 2.076676  | 4.226181  |
| 30 | 6 | 0 | 2.971405  | -0.549215 | -0.086201 |
| 31 | 6 | 0 | 3.380199  | -3.311592 | -0.296975 |
| 32 | 6 | 0 | 4.270015  | -0.378188 | 0.511559  |
| 33 | 1 | 0 | 2.870567  | -0.397659 | -1.153581 |
| 34 | 6 | 0 | 4.105880  | -3.008258 | 0.973892  |
| 35 | 6 | 0 | 4.222101  | -3.064658 | -1.367160 |
| 36 | 1 | 0 | 2.412332  | -3.797712 | -0.349705 |
| 37 | 6 | 0 | 5.189342  | -2.057271 | 0.478885  |
| 38 | 1 | 0 | 4.226380  | -0.309519 | 1.599890  |
| 39 | 1 | 0 | 4.606188  | -3.930773 | 1.312505  |
| 40 | 1 | 0 | 3.488582  | -2.657112 | 1.802203  |
| 41 | 6 | 0 | 5.357455  | -2.380438 | -0.895804 |
| 42 | 1 | 0 | 6.056566  | -1.834938 | 1.095385  |
| 43 | 6 | 0 | 1.834183  | -0.693909 | 0.704309  |
| 44 | 1 | 0 | 1.984206  | -0.809484 | 1.775129  |
| 45 | 1 | 0 | 4.021794  | -3.314696 | -2.402839 |
| 46 | 1 | 0 | 6.186870  | -2.048873 | -1.510115 |
| 47 | 6 | 0 | 5.233474  | 0.623290  | -0.050539 |
| 48 | 6 | 0 | 6.049370  | 1.339012  | 0.837658  |
| 49 | 6 | 0 | 5.353140  | 0.877703  | -1.425604 |
| 50 | 6 | 0 | 6.956151  | 2.290304  | 0.368634  |
| 51 | 1 | 0 | 5.967569  | 1.158206  | 1.907229  |
| 52 | 6 | 0 | 6.259700  | 1.825653  | -1.895398 |
| 53 | 1 | 0 | 4.739483  | 0.335793  | -2.140932 |
| 54 | 6 | 0 | 7.064410  | 2.535956  | -0.999738 |
| 55 | 1 | 0 | 7.574498  | 2.838144  | 1.073529  |
| 56 | 1 | 0 | 6.337393  | 2.012958  | -2.962538 |
| 57 | 1 | 0 | 7.769455  | 3.274799  | -1.368741 |
| 58 | 6 | 0 | -5.943997 | -2.871647 | -1.592426 |
| 59 | 6 | 0 | -4.493638 | -0.927051 | -1.656607 |
| 60 | 6 | 0 | -5.577026 | -1.621600 | -2.145619 |
| 61 | 1 | 0 | -3.535938 | -4.280271 | 1.362353  |
| 62 | 1 | 0 | -5.459972 | -4.381675 | -0.150786 |
| 63 | 1 | 0 | -6.806008 | -3.403636 | -1.984031 |
| 64 | 1 | 0 | -6.154394 | -1.208114 | -2.967457 |
| 65 | 1 | 0 | -4.224086 | 0.025177  | -2.098073 |
| 66 | 6 | 0 | -4.652407 | 4.058914  | -0.226016 |
| 67 | 6 | 0 | -4.294235 | 1.702072  | 0.229462  |
| 68 | 6 | 0 | -5.083576 | 2.827025  | 0.321213  |
| 69 | 1 | 0 | -0.951446 | 4.060670  | -1.902533 |
| 70 | 1 | 0 | -3.072649 | 5.089825  | -1.243237 |
| 71 | 1 | 0 | -5.289782 | 4.935225  | -0.152845 |

|    |   |   |           |          |          |
|----|---|---|-----------|----------|----------|
| 72 | 1 | 0 | -6.046304 | 2.769450 | 0.821095 |
| 73 | 1 | 0 | -4.636459 | 0.769315 | 0.662111 |

---

**z-exo-si-a**

---

|    |   |   |           |           |           |
|----|---|---|-----------|-----------|-----------|
| 1  | 6 | 0 | -2.511552 | -0.579222 | 0.608365  |
| 2  | 6 | 0 | -1.593021 | -0.833658 | 1.623639  |
| 3  | 6 | 0 | -0.028843 | 0.458840  | -0.477775 |
| 4  | 6 | 0 | -0.573150 | 0.221125  | 1.982342  |
| 5  | 1 | 0 | 0.734788  | 1.021112  | -1.025050 |
| 6  | 1 | 0 | -1.045145 | 1.199412  | 2.121008  |
| 7  | 1 | 0 | -0.051882 | -0.041768 | 2.905069  |
| 8  | 7 | 0 | 0.456888  | 0.353725  | 0.915670  |
| 9  | 6 | 0 | -1.318301 | 1.260771  | -0.561912 |
| 10 | 6 | 0 | -2.507756 | 0.774347  | -0.024779 |
| 11 | 6 | 0 | -1.270292 | 2.533016  | -1.182661 |
| 12 | 1 | 0 | -0.337567 | 2.874156  | -1.625598 |
| 13 | 6 | 0 | -3.673532 | 1.615961  | -0.026290 |
| 14 | 6 | 0 | -3.610394 | 2.897863  | -0.669855 |
| 15 | 6 | 0 | -2.391813 | 3.321468  | -1.257567 |
| 16 | 6 | 0 | -4.761651 | 3.730883  | -0.684181 |
| 17 | 6 | 0 | -1.571815 | -2.083530 | 2.289318  |
| 18 | 6 | 0 | -3.385430 | -1.632582 | 0.168690  |
| 19 | 6 | 0 | -2.455317 | -3.074638 | 1.939130  |
| 20 | 6 | 0 | -3.363962 | -2.888165 | 0.864469  |
| 21 | 1 | 0 | -0.857372 | -2.248245 | 3.091952  |
| 22 | 6 | 0 | -4.232532 | -3.931911 | 0.445651  |
| 23 | 6 | 0 | 1.753298  | 0.368808  | 1.222527  |
| 24 | 1 | 0 | 1.950861  | 0.319728  | 2.291976  |
| 25 | 6 | 0 | -0.120993 | -0.900979 | -1.212306 |
| 26 | 8 | 0 | -0.719101 | -1.027515 | -2.252791 |
| 27 | 8 | 0 | 0.602889  | -1.855840 | -0.612284 |
| 28 | 6 | 0 | 0.590841  | -3.143765 | -1.270620 |
| 29 | 1 | 0 | 0.971133  | -3.050908 | -2.290193 |
| 30 | 1 | 0 | 1.238627  | -3.780415 | -0.669241 |
| 31 | 1 | 0 | -0.426986 | -3.537999 | -1.296783 |
| 32 | 6 | 0 | 2.849044  | 0.406400  | 0.364210  |
| 33 | 6 | 0 | 4.193464  | 0.300121  | 0.869745  |
| 34 | 6 | 0 | 3.018838  | 3.218264  | 0.399540  |
| 35 | 1 | 0 | 2.690673  | 0.342925  | -0.704719 |
| 36 | 6 | 0 | 4.956279  | 2.041560  | 0.961483  |
| 37 | 1 | 0 | 4.223202  | 0.118562  | 1.945933  |
| 38 | 6 | 0 | 3.831558  | 2.850196  | 1.598728  |
| 39 | 6 | 0 | 3.818231  | 3.143821  | -0.728144 |
| 40 | 1 | 0 | 2.014830  | 3.626443  | 0.441778  |
| 41 | 6 | 0 | 5.025672  | 2.511698  | -0.380668 |
| 42 | 1 | 0 | 5.872942  | 1.842079  | 1.510943  |
| 43 | 1 | 0 | 4.278346  | 3.772415  | 2.006138  |
| 44 | 1 | 0 | 3.284686  | 2.372289  | 2.412869  |

|    |   |   |           |           |           |
|----|---|---|-----------|-----------|-----------|
| 45 | 1 | 0 | 5.844691  | 2.312110  | -1.062338 |
| 46 | 1 | 0 | 3.546246  | 3.478025  | -1.723020 |
| 47 | 6 | 0 | 5.202686  | -0.549323 | 0.156022  |
| 48 | 6 | 0 | 6.145249  | -1.254828 | 0.918071  |
| 49 | 6 | 0 | 5.245162  | -0.667307 | -1.241803 |
| 50 | 6 | 0 | 7.102090  | -2.063666 | 0.303524  |
| 51 | 1 | 0 | 6.126499  | -1.177199 | 2.003131  |
| 52 | 6 | 0 | 6.200762  | -1.473614 | -1.856736 |
| 53 | 1 | 0 | 4.531836  | -0.130024 | -1.861645 |
| 54 | 6 | 0 | 7.132761  | -2.175031 | -1.086203 |
| 55 | 1 | 0 | 7.820506  | -2.605125 | 0.911869  |
| 56 | 1 | 0 | 6.217582  | -1.556858 | -2.939620 |
| 57 | 1 | 0 | 7.876431  | -2.802448 | -1.568294 |
| 58 | 6 | 0 | -4.240528 | -1.505315 | -0.960871 |
| 59 | 6 | 0 | -5.066328 | -3.763728 | -0.635178 |
| 60 | 6 | 0 | -5.057429 | -2.542871 | -1.350795 |
| 61 | 1 | 0 | -2.452565 | -4.025180 | 2.466138  |
| 62 | 1 | 0 | -4.216811 | -4.872181 | 0.990854  |
| 63 | 1 | 0 | -5.722633 | -4.569579 | -0.950459 |
| 64 | 1 | 0 | -5.696844 | -2.425947 | -2.220899 |
| 65 | 1 | 0 | -4.234276 | -0.582776 | -1.529134 |
| 66 | 6 | 0 | -4.887010 | 1.254734  | 0.624833  |
| 67 | 6 | 0 | -5.924262 | 3.337367  | -0.064878 |
| 68 | 6 | 0 | -5.979599 | 2.092002  | 0.605389  |
| 69 | 1 | 0 | -2.353599 | 4.287780  | -1.753286 |
| 70 | 1 | 0 | -4.701416 | 4.692643  | -1.187025 |
| 71 | 1 | 0 | -6.797353 | 3.983101  | -0.077896 |
| 72 | 1 | 0 | -6.893118 | 1.795622  | 1.112680  |
| 73 | 1 | 0 | -4.947373 | 0.308361  | 1.149035  |

---

**z-exo-si-b**

---

|    |   |   |           |           |           |
|----|---|---|-----------|-----------|-----------|
| 1  | 6 | 0 | 2.442309  | -0.553488 | -0.714094 |
| 2  | 6 | 0 | 1.513136  | -0.728330 | -1.736628 |
| 3  | 6 | 0 | 0.001565  | 0.541373  | 0.421019  |
| 4  | 6 | 0 | 0.533678  | 0.380552  | -2.043629 |
| 5  | 1 | 0 | -0.737047 | 1.115509  | 0.991493  |
| 6  | 1 | 0 | 1.039831  | 1.347022  | -2.133056 |
| 7  | 1 | 0 | 0.004155  | 0.183904  | -2.977936 |
| 8  | 7 | 0 | -0.490296 | 0.494323  | -0.970844 |
| 9  | 6 | 0 | 1.324764  | 1.281339  | 0.535153  |
| 10 | 6 | 0 | 2.493844  | 0.771179  | -0.025061 |
| 11 | 6 | 0 | 1.330912  | 2.525316  | 1.213719  |
| 12 | 1 | 0 | 0.411989  | 2.888317  | 1.667978  |
| 13 | 6 | 0 | 3.693414  | 1.563275  | 0.012081  |
| 14 | 6 | 0 | 3.684502  | 2.815360  | 0.714348  |
| 15 | 6 | 0 | 2.484454  | 3.261619  | 1.323351  |
| 16 | 6 | 0 | 4.869577  | 3.598055  | 0.763976  |
| 17 | 6 | 0 | 1.433987  | -1.949814 | -2.447470 |

|    |   |   |           |           |           |
|----|---|---|-----------|-----------|-----------|
| 18 | 6 | 0 | 3.269681  | -1.660620 | -0.318118 |
| 19 | 6 | 0 | 2.268969  | -2.993646 | -2.134564 |
| 20 | 6 | 0 | 3.186808  | -2.888265 | -1.057308 |
| 21 | 1 | 0 | 0.708673  | -2.053752 | -3.250247 |
| 22 | 6 | 0 | 4.004992  | -3.986893 | -0.678830 |
| 23 | 6 | 0 | -1.790220 | 0.443559  | -1.260667 |
| 24 | 1 | 0 | -1.998498 | 0.394618  | -2.327899 |
| 25 | 6 | 0 | -0.030393 | -0.884302 | 1.031780  |
| 26 | 8 | 0 | -0.678893 | -1.796759 | 0.575681  |
| 27 | 8 | 0 | 0.673832  | -0.920059 | 2.165593  |
| 28 | 6 | 0 | 0.682112  | -2.190137 | 2.857912  |
| 29 | 1 | 0 | 1.150708  | -2.951394 | 2.231082  |
| 30 | 1 | 0 | 1.266257  | -2.019821 | 3.761183  |
| 31 | 1 | 0 | -0.338019 | -2.493787 | 3.103115  |
| 32 | 6 | 0 | -2.876218 | 0.429991  | -0.389983 |
| 33 | 6 | 0 | -4.218727 | 0.249720  | -0.879846 |
| 34 | 6 | 0 | -3.184421 | 3.220211  | -0.458738 |
| 35 | 1 | 0 | -2.702513 | 0.370093  | 0.676521  |
| 36 | 6 | 0 | -5.072275 | 1.947841  | -0.975322 |
| 37 | 1 | 0 | -4.250592 | 0.057480  | -1.953979 |
| 38 | 6 | 0 | -3.999896 | 2.803312  | -1.640173 |
| 39 | 6 | 0 | -3.962199 | 3.122731  | 0.682564  |
| 40 | 1 | 0 | -2.202861 | 3.676920  | -0.522952 |
| 41 | 6 | 0 | -5.143263 | 2.429883  | 0.362407  |
| 42 | 1 | 0 | -5.986211 | 1.695795  | -1.507401 |
| 43 | 1 | 0 | -4.497696 | 3.699677  | -2.046031 |
| 44 | 1 | 0 | -3.446154 | 2.344621  | -2.460651 |
| 45 | 1 | 0 | -5.940375 | 2.198491  | 1.059707  |
| 46 | 1 | 0 | -3.690457 | 3.481317  | 1.668996  |
| 47 | 6 | 0 | -5.173677 | -0.645263 | -0.147739 |
| 48 | 6 | 0 | -6.077036 | -1.416359 | -0.893327 |
| 49 | 6 | 0 | -5.202608 | -0.742746 | 1.251750  |
| 50 | 6 | 0 | -6.981302 | -2.270192 | -0.260517 |
| 51 | 1 | 0 | -6.067266 | -1.355990 | -1.979546 |
| 52 | 6 | 0 | -6.105789 | -1.593636 | 1.884889  |
| 53 | 1 | 0 | -4.518128 | -0.155078 | 1.858228  |
| 54 | 6 | 0 | -6.998433 | -2.360981 | 1.130834  |
| 55 | 1 | 0 | -7.668907 | -2.863385 | -0.856081 |
| 56 | 1 | 0 | -6.111808 | -1.661255 | 2.968967  |
| 57 | 1 | 0 | -7.700838 | -3.024064 | 1.626899  |
| 58 | 6 | 0 | 4.137833  | -1.613974 | 0.808802  |
| 59 | 6 | 0 | 4.850400  | -3.898166 | 0.402363  |
| 60 | 6 | 0 | 4.905603  | -2.702774 | 1.158051  |
| 61 | 1 | 0 | 2.217378  | -3.924934 | -2.692166 |
| 62 | 1 | 0 | 3.940357  | -4.905757 | -1.255806 |
| 63 | 1 | 0 | 5.468167  | -4.745362 | 0.685414  |
| 64 | 1 | 0 | 5.559124  | -2.644756 | 2.023856  |
| 65 | 1 | 0 | 4.187252  | -0.708847 | 1.402957  |
| 66 | 6 | 0 | 4.889998  | 1.182249  | -0.658690 |
| 67 | 6 | 0 | 6.014115  | 3.185577  | 0.123511  |
| 68 | 6 | 0 | 6.016682  | 1.971487  | -0.603909 |

|    |   |   |          |          |           |
|----|---|---|----------|----------|-----------|
| 69 | 1 | 0 | 2.485702 | 4.206131 | 1.860844  |
| 70 | 1 | 0 | 4.849976 | 4.537509 | 1.310368  |
| 71 | 1 | 0 | 6.913249 | 3.793364 | 0.163338  |
| 72 | 1 | 0 | 6.916210 | 1.661518 | -1.127807 |
| 73 | 1 | 0 | 4.909640 | 0.259910 | -1.227062 |

---

**z-exo-re-a**

---

|    |   |   |           |           |           |
|----|---|---|-----------|-----------|-----------|
| 1  | 6 | 0 | 2.592000  | -0.320101 | -0.543194 |
| 2  | 6 | 0 | 1.733370  | -0.899838 | -1.473961 |
| 3  | 6 | 0 | -0.041030 | 0.331864  | 0.484287  |
| 4  | 6 | 0 | 0.516562  | -0.136882 | -1.938874 |
| 5  | 1 | 0 | -0.890472 | 0.792248  | 0.995920  |
| 6  | 1 | 0 | 0.779654  | 0.882161  | -2.241865 |
| 7  | 1 | 0 | 0.050882  | -0.636936 | -2.790781 |
| 8  | 7 | 0 | -0.514746 | -0.043838 | -0.865874 |
| 9  | 6 | 0 | 1.055600  | 1.386053  | 0.409836  |
| 10 | 6 | 0 | 2.314153  | 1.080436  | -0.102540 |
| 11 | 6 | 0 | 0.747187  | 2.696933  | 0.847325  |
| 12 | 1 | 0 | -0.235403 | 2.903442  | 1.263693  |
| 13 | 6 | 0 | 3.279212  | 2.133718  | -0.264769 |
| 14 | 6 | 0 | 1.681804  | 3.699419  | 0.767904  |
| 15 | 6 | 0 | 1.967843  | -2.208040 | -1.963698 |
| 16 | 6 | 0 | 3.673177  | -1.098748 | -0.002786 |
| 17 | 6 | 0 | 3.045216  | -2.936108 | -1.522548 |
| 18 | 6 | 0 | 3.908405  | -2.416466 | -0.522228 |
| 19 | 1 | 0 | 1.295807  | -2.625807 | -2.709339 |
| 20 | 6 | 0 | 4.985124  | -3.187084 | -0.006396 |
| 21 | 6 | 0 | -1.805850 | -0.182435 | -1.169176 |
| 22 | 1 | 0 | -1.986348 | -0.341836 | -2.230881 |
| 23 | 6 | 0 | 0.357558  | -0.862636 | 1.379839  |
| 24 | 8 | 0 | 0.941235  | -0.705593 | 2.423711  |
| 25 | 8 | 0 | -0.074386 | -2.051411 | 0.918253  |
| 26 | 6 | 0 | 0.323832  | -3.184101 | 1.727009  |
| 27 | 1 | 0 | -0.095864 | -3.101123 | 2.732025  |
| 28 | 1 | 0 | -0.065610 | -4.062597 | 1.212375  |
| 29 | 1 | 0 | 1.412366  | -3.230130 | 1.792054  |
| 30 | 6 | 0 | -2.917306 | -0.103047 | -0.334982 |
| 31 | 6 | 0 | -3.148807 | -2.900530 | -0.166209 |
| 32 | 6 | 0 | -4.246210 | -0.002060 | -0.876205 |
| 33 | 1 | 0 | -2.778209 | 0.030909  | 0.730901  |
| 34 | 6 | 0 | -3.952336 | -2.622178 | -1.394428 |
| 35 | 6 | 0 | -3.947855 | -2.714833 | 0.947186  |
| 36 | 1 | 0 | -2.142988 | -3.301204 | -0.169458 |
| 37 | 6 | 0 | -5.071234 | -1.754823 | -0.832591 |
| 38 | 1 | 0 | -4.257825 | 0.071009  | -1.964929 |
| 39 | 1 | 0 | -4.406914 | -3.569111 | -1.730325 |
| 40 | 1 | 0 | -3.397726 | -2.219098 | -2.243294 |
| 41 | 6 | 0 | -5.147301 | -2.098231 | 0.542398  |

|    |   |   |           |           |           |
|----|---|---|-----------|-----------|-----------|
| 42 | 1 | 0 | -5.976924 | -1.569773 | -1.403884 |
| 43 | 1 | 0 | -5.962491 | -1.824222 | 1.202625  |
| 44 | 1 | 0 | -3.678932 | -2.956949 | 1.968996  |
| 45 | 6 | 0 | -5.249179 | 0.923859  | -0.261667 |
| 46 | 6 | 0 | -6.168186 | 1.569682  | -1.102256 |
| 47 | 6 | 0 | -5.310927 | 1.173411  | 1.118485  |
| 48 | 6 | 0 | -7.120082 | 2.447240  | -0.582213 |
| 49 | 1 | 0 | -6.133851 | 1.390367  | -2.174766 |
| 50 | 6 | 0 | -6.262158 | 2.048056  | 1.638954  |
| 51 | 1 | 0 | -4.617732 | 0.684047  | 1.797893  |
| 52 | 6 | 0 | -7.170113 | 2.688554  | 0.790437  |
| 53 | 1 | 0 | -7.819256 | 2.941192  | -1.250409 |
| 54 | 1 | 0 | -6.294440 | 2.232678  | 2.708836  |
| 55 | 1 | 0 | -7.909964 | 3.370226  | 1.199129  |
| 56 | 6 | 0 | 2.956635  | 3.453929  | 0.198289  |
| 57 | 6 | 0 | 4.533930  | 1.940280  | -0.909314 |
| 58 | 6 | 0 | 3.909112  | 4.498448  | 0.052370  |
| 59 | 6 | 0 | 5.121494  | 4.267777  | -0.553359 |
| 60 | 6 | 0 | 5.427822  | 2.977873  | -1.048812 |
| 61 | 1 | 0 | 1.446299  | 4.699298  | 1.122207  |
| 62 | 1 | 0 | 3.654218  | 5.488964  | 0.420139  |
| 63 | 1 | 0 | 5.840598  | 5.074001  | -0.664252 |
| 64 | 1 | 0 | 6.376997  | 2.806144  | -1.548156 |
| 65 | 1 | 0 | 4.784554  | 0.962326  | -1.302976 |
| 66 | 6 | 0 | 4.498133  | -0.639447 | 1.061235  |
| 67 | 6 | 0 | 5.780607  | -2.698768 | 1.003932  |
| 68 | 6 | 0 | 5.522783  | -1.418872 | 1.549870  |
| 69 | 1 | 0 | 3.238025  | -3.929662 | -1.918943 |
| 70 | 1 | 0 | 5.162256  | -4.176483 | -0.420399 |
| 71 | 1 | 0 | 6.598663  | -3.297307 | 1.393899  |
| 72 | 1 | 0 | 6.136108  | -1.050208 | 2.366857  |
| 73 | 1 | 0 | 4.305032  | 0.332487  | 1.499598  |

---

**z-exo-re-b**

---

|    |   |   |           |           |           |
|----|---|---|-----------|-----------|-----------|
| 1  | 6 | 0 | 2.523454  | -0.366152 | -0.632343 |
| 2  | 6 | 0 | 1.630354  | -0.871353 | -1.574193 |
| 3  | 6 | 0 | -0.058251 | 0.475565  | 0.385210  |
| 4  | 6 | 0 | 0.474995  | -0.013287 | -2.033572 |
| 5  | 1 | 0 | -0.876821 | 0.997320  | 0.891321  |
| 6  | 1 | 0 | 0.810816  | 0.990744  | -2.312238 |
| 7  | 1 | 0 | -0.018374 | -0.459986 | -2.899181 |
| 8  | 7 | 0 | -0.549144 | 0.121797  | -0.962215 |
| 9  | 6 | 0 | 1.114479  | 1.443195  | 0.323235  |
| 10 | 6 | 0 | 2.350434  | 1.048378  | -0.183609 |
| 11 | 6 | 0 | 0.903884  | 2.771100  | 0.769369  |
| 12 | 1 | 0 | -0.064666 | 3.049775  | 1.176809  |
| 13 | 6 | 0 | 3.393480  | 2.026645  | -0.330569 |
| 14 | 6 | 0 | 1.912039  | 3.700782  | 0.703993  |
| 15 | 6 | 0 | 1.760630  | -2.193399 | -2.063551 |



|    |   |   |           |           |           |
|----|---|---|-----------|-----------|-----------|
| 16 | 6 | 0 | 3.532906  | -1.231277 | -0.084840 |
| 17 | 6 | 0 | 2.765978  | -3.010465 | -1.609028 |
| 18 | 6 | 0 | 3.658730  | -2.565213 | -0.599667 |
| 19 | 1 | 0 | 1.062860  | -2.554171 | -2.815127 |
| 20 | 6 | 0 | 4.658980  | -3.425500 | -0.071604 |
| 21 | 6 | 0 | -1.841427 | -0.075874 | -1.233047 |
| 22 | 1 | 0 | -2.037476 | -0.257717 | -2.288225 |
| 23 | 6 | 0 | 0.182942  | -0.805243 | 1.219337  |
| 24 | 8 | 0 | -0.258312 | -1.898590 | 0.938399  |
| 25 | 8 | 0 | 0.858753  | -0.513062 | 2.331200  |
| 26 | 6 | 0 | 1.116610  | -1.617520 | 3.227447  |
| 27 | 1 | 0 | 1.736447  | -2.364737 | 2.727970  |
| 28 | 1 | 0 | 1.644515  | -1.181452 | 4.074266  |
| 29 | 1 | 0 | 0.176651  | -2.072677 | 3.547832  |
| 30 | 6 | 0 | -2.935663 | -0.024383 | -0.378590 |
| 31 | 6 | 0 | -3.006351 | -2.871736 | -0.151185 |
| 32 | 6 | 0 | -4.277262 | -0.016786 | -0.894417 |
| 33 | 1 | 0 | -2.781538 | 0.132429  | 0.682120  |
| 34 | 6 | 0 | -3.845931 | -2.645768 | -1.365705 |
| 35 | 6 | 0 | -3.786067 | -2.689964 | 0.975347  |
| 36 | 1 | 0 | -1.977556 | -3.208497 | -0.157987 |
| 37 | 6 | 0 | -4.998002 | -1.827268 | -0.797493 |
| 38 | 1 | 0 | -4.315398 | 0.025277  | -1.984018 |
| 39 | 1 | 0 | -4.259724 | -3.617369 | -1.683660 |
| 40 | 1 | 0 | -3.324540 | -2.229393 | -2.229251 |
| 41 | 6 | 0 | -5.022874 | -2.139370 | 0.585446  |
| 42 | 1 | 0 | -5.924666 | -1.702121 | -1.351057 |
| 43 | 1 | 0 | -5.835451 | -1.888915 | 1.258474  |
| 44 | 1 | 0 | -3.477419 | -2.892886 | 1.994148  |
| 45 | 6 | 0 | -5.326453 | 0.855740  | -0.281794 |
| 46 | 6 | 0 | -6.299448 | 1.423484  | -1.118202 |
| 47 | 6 | 0 | -5.378469 | 1.134011  | 1.093392  |
| 48 | 6 | 0 | -7.293735 | 2.253386  | -0.599469 |
| 49 | 1 | 0 | -6.273869 | 1.220618  | -2.186732 |
| 50 | 6 | 0 | -6.371913 | 1.960914  | 1.612734  |
| 51 | 1 | 0 | -4.643972 | 0.703344  | 1.769110  |
| 52 | 6 | 0 | -7.333045 | 2.524268  | 0.768027  |
| 53 | 1 | 0 | -8.034409 | 2.687411  | -1.264603 |
| 54 | 1 | 0 | -6.396262 | 2.168490  | 2.678645  |
| 55 | 1 | 0 | -8.105973 | 3.168959  | 1.175571  |
| 56 | 6 | 0 | 3.169132  | 3.363861  | 0.141267  |
| 57 | 6 | 0 | 4.634137  | 1.742855  | -0.968811 |
| 58 | 6 | 0 | 4.199140  | 4.334051  | 0.009483  |
| 59 | 6 | 0 | 5.394571  | 4.016176  | -0.590644 |
| 60 | 6 | 0 | 5.605337  | 2.710444  | -1.094485 |
| 61 | 1 | 0 | 1.749222  | 4.713729  | 1.062121  |
| 62 | 1 | 0 | 4.017498  | 5.338654  | 0.382519  |
| 63 | 1 | 0 | 6.173397  | 4.766319  | -0.691360 |
| 64 | 1 | 0 | 6.541889  | 2.470948  | -1.589738 |
| 65 | 1 | 0 | 4.811894  | 0.751551  | -1.368995 |
| 66 | 6 | 0 | 4.389672  | -0.841327 | 0.982931  |

|    |   |   |          |           |           |
|----|---|---|----------|-----------|-----------|
| 67 | 6 | 0 | 5.485417 | -3.006727 | 0.944958  |
| 68 | 6 | 0 | 5.338318 | -1.705881 | 1.482826  |
| 69 | 1 | 0 | 2.875639 | -4.018412 | -2.000346 |
| 70 | 1 | 0 | 4.751599 | -4.428024 | -0.481318 |
| 71 | 1 | 0 | 6.244360 | -3.673538 | 1.343573  |
| 72 | 1 | 0 | 5.980326 | -1.386785 | 2.298950  |
| 73 | 1 | 0 | 4.287117 | 0.149565  | 1.410007  |

---
